# Supplementary material for: Mfn2 ubiquitination by PINK1/parkin gates the p97-dependent release of ER from mitochondria to drive mitophagy
Source: eLife. 2018 Apr 20;7:e32866. doi: 10.7554/eLife.32866 (PMC5927771; doi:10.7554/eLife.32866)
Supplement: Figure 1—source data 1. [file elife-32866-fig1-data1.xlsx]

## Sheet: 1B to 1D
Numerical source data for Figure 1B to D
U2OS:GFP-parkin + untreated (block 8)					conversion factor: 0.5 um = 0.32
TEM image file	mito	location	length OMM	length ER-OMM	REAL L(OMM)	REAL L(ER-OMM)	% apposition
block 8 image 1	1	left	1.719	0.107	2.68594	0.167187	6.22455
	2	middle	1.846	0.817	2.88438	1.27656	44.2579
	3	right	4.531	2.097	7.07969	3.27656	46.2812
block 8 image 2	4	1	4.85	0.371	7.57812	0.579688	7.64948
	5	2	1.839	0.771	2.87344	1.20469	41.925
	6	3	3.758	1.401	5.87188	2.18906	37.2805
	7	4	5.784	2.073	9.0375	3.23906	35.8402
block 8 image 3	8	1	1.483	0.345	2.31719	0.539062	23.2637
	9	2	2.792	0.869	4.3625	1.35781	31.1246
	10	3	0.88	0.269	1.375	0.420313	30.5682
	11	4	1.192	0.785	1.8625	1.22656	65.8557
	12	5	1.223	0.812	1.91094	1.26875	66.3941
	13	6	1.432	0.671	2.2375	1.04844	46.8575
block 8 image 4	14	only	4.957	1.883	7.74531	2.94219	37.9867
block 8 image 5	15	left	3.522	0.642	5.50312	1.00313	18.2283
	16	right	5.772	1.149	9.01875	1.79531	19.9064
block 8 image 6	17	left	3.122	0.889	4.87812	1.38906	28.4753
	18	right	6.701	2.007	10.4703	3.13594	29.9508
block 8 image 7	19	1	6.275	0.365	9.80469	0.570312	5.81673
	20	2	1.891	0.432	2.95469	0.675	22.8451
	21	3	2.039	0.846	3.18594	1.32187	41.4909
block 8 image 8	22	top	2.729	0	4.26406	0	0
	23	middle	7.122	1.302	11.1281	2.03438	18.2814
	24	bottom	1.388	0.633	2.16875	0.989062	45.6052
block 8 image 9	25	1	2.701	0.512	4.22031	0.8	18.9559
	26	2	1.561	0.961	2.43906	1.50156	61.5631
	27	3	2.986	0.325	4.66563	0.507812	10.8841
	28	4	1.811	0.164	2.82969	0.25625	9.05577
block 8 image 10	29	1	3.079	0	4.81094	0	0
	30	2	10.181	2.93	15.9078	4.57812	28.7791
	31	3	1.589	0.246	2.48281	0.384375	15.4814
block 8 image 11	32	left	3.543	0.755	5.53594	1.17969	21.3096
	33	right	9.536	1.419	14.9	2.21719	14.8805
block 8 image 12	34	1	4.419	2.857	6.90469	4.46406	64.6526
	35	2	6.422	2.795	10.0344	4.36719	43.5223
	36	3	1.953	0.652	3.05156	1.01875	33.3845
	37	4	3.856	1.128	6.025	1.7625	29.2531
	38	5	1.594	0.194	2.49063	0.303125	12.1706
block 8 image 13	39	1	4.737	1.63	7.40156	2.54688	34.41
	40	2	2.953	1.919	4.61406	2.99844	64.9848
	41	3	2.243	0.586	3.50469	0.915625	26.1257
	42	4	0.586	0.193	0.915625	0.301563	32.9352
	43	5	3.431	1.534	5.36094	2.39688	44.71
block 8 image 14	44	top	3.273	1.386	5.11406	2.16562	42.3465
	45	bottom	2.842	1.242	4.44062	1.94063	43.7016
block 8 image 15	46	left	1.836	0.494	2.86875	0.771875	26.9063
	47	right	5.662	1.395	8.84688	2.17969	24.6379
block 8 image 16	48	1	8.608	1.659	13.45	2.59219	19.2728
	49	2	3.111	1.327	4.86094	2.07344	42.6551
	50	3	4.736	1.404	7.4	2.19375	29.6453
	51	4	2.787	0.394	4.35469	0.615625	14.1371
block 8 image 17	52	1	13.75	8.006	21.4844	12.5094	58.2255
	53	2	1.766	1.219	2.75937	1.90469	69.026
	54	3	1.39	0.346	2.17188	0.540625	24.8921
	55	4	2.014	1.303	3.14687	2.03594	64.6971
	56	5	4.615	2.858	7.21094	4.46563	61.9285
	57	6	2.179	1.264	3.40469	1.975	58.0083
	58	7	2.256	1.584	3.525	2.475	70.2128
	59	8	6.149	3.284	9.60781	5.13125	53.4071
	60	9	3.965	1.345	6.19531	2.10156	33.9218
	61	10	6.011	3.352	9.39219	5.2375	55.7644
	62	11	5.001	2.648	7.81406	4.1375	52.9494
	63	12	1.513	0.398	2.36406	0.621875	26.3054
	64	13	2.055	0.77	3.21094	1.20312	37.4696
block 8 image 18	65	1	2.152	0.725	3.3625	1.13281	33.6896
	66	2	2.396	0.762	3.74375	1.19063	31.803
	67	3	3.016	1.148	4.7125	1.79375	38.0637
	68	4	2.362	2.043	3.69063	3.19219	86.4945
	69	5	2.626	0.845	4.10312	1.32031	32.1782
	70	6	1.975	1.055	3.08594	1.64844	53.4177
	71	7	1.931	0.894	3.01719	1.39687	46.2973
	72	8	2.172	1.151	3.39375	1.79844	52.9926
	73	9	1.733	1.189	2.70781	1.85781	68.6093
	74	10	4.828	1.933	7.54375	3.02031	40.0373
	75	11	2.702	1.073	4.22187	1.67656	39.7113
	76	12	2.232	0.142	3.4875	0.221875	6.36201
	77	13	2.531	0.582	3.95469	0.909375	22.9949
block 8 image 19	78	1	1.714	0.524	2.67813	0.81875	30.5718
	79	2	1.889	0.139	2.95156	0.217188	7.35839
	80	3	2.527	0.894	3.94844	1.39687	35.3779
	81	4	3.226	0.54	5.04063	0.84375	16.739
	82	5	3.077	0.434	4.80781	0.678125	14.1046
	83	6	5.774	1.232	9.02187	1.925	21.337
	84	7	3.446	1.227	5.38438	1.91719	35.6065
	85	8	2.943	1.137	4.59844	1.77656	38.634
	86	9	3.007	1.348	4.69844	2.10625	44.8287
		XBAR	3.41635	1.17478	5.33805	1.83559	35.1917
		SIGMA	2.22432	1.06873	3.4755	1.66989	18.5542
U2OS:GFP-parkin + 4h CCCP (block 6)
TEM image file	mito	location	length OMM	length ER-OMM	REAL L(OMM)	REAL L(ER-OMM)	% apposition
block 6 image 1	1	1	2.067	0.173	3.22969	0.270312	8.36962
	2	2	1.325	0.862	2.07031	1.34688	65.0566
	3	3	1.399	0.567	2.18594	0.885937	40.5289
	4	4	1.174	0	1.83437	0	0
	5	5	2.123	0.15	3.31719	0.234375	7.06547
	6	6	1.163	0.319	1.81719	0.498438	27.4291
	7	7	2.179	0.214	3.40469	0.334375	9.82102
block 6 image 2	8	1	1.645	0	2.57031	0	0
	9	2	1.112	0	1.7375	0	0
	10	3	1.261	0.217	1.97031	0.339062	17.2086
	11	4	2.01	0	3.14062	0	0
	12	5	3	0.974	4.6875	1.52187	32.4667
block 6 image 3	13	1	2.036	0.193	3.18125	0.301563	9.47937
	14	2	1.484	0	2.31875	0	0
	15	3	2.321	0.501	3.62656	0.782813	21.5855
	16	4	2.536	0	3.9625	0	0
	17	5	2.54	0	3.96875	0	0
	18	6	1.142	0	1.78437	0	0
	19	7	3.717	0	5.80781	0	0
	20	8	2.548	0	3.98125	0	0
	21	9	2.777	0	4.33906	0	0
	22	10	1.4	0	2.1875	0	0
	23	11	1.51	0	2.35938	0	0
	24	12	1.717	0.126	2.68281	0.196875	7.33838
	25	13	1.258	0	1.96562	0	0
	26	14	2.065	0	3.22656	0	0
block 6 image 4	27	1	3.876	0	6.05625	0	0
	28	2	1.865	0.366	2.91406	0.571875	19.6247
	29	3	3.512	0.238	5.4875	0.371875	6.77677
	30	4	2.44	0	3.8125	0	0
	31	5	1.49	0	2.32812	0	0
	32	6	3.509	0.209	5.48281	0.326562	5.95611
block 6 image 5	33	1	3.61	0	5.64062	0	0
	34	2	3.061	0	4.78281	0	0
	35	3	2.075	0	3.24219	0	0
	36	4	1.615	0.399	2.52344	0.623438	24.7059
	37	5	3.389	0	5.29531	0	0
	38	6	2.394	0	3.74063	0	0
	39	7	1.672	0.168	2.6125	0.2625	10.0478
block 6 image 6	40	1	4.407	0	6.88594	0	0
	41	2	2.424	0.254	3.7875	0.396875	10.4785
	42	3	2.354	0	3.67813	0	0
	43	4	1.445	0	2.25781	0	0
	44	5	1.88	0	2.9375	0	0
	45	6	2.993	0	4.67656	0	0
	46	7	5.635	0	8.80469	0	0
	47	8	3.436	0	5.36875	0	0
	48	9	4.277	0	6.68281	0	0
	49	10	1.445	0	2.25781	0	0
	50	11	1.328	0	2.075	0	0
block 6 image 7	51	1	3.123	0	4.87969	0	0
	52	2	1.586	0	2.47812	0	0
	53	3	1.844	0	2.88125	0	0
	54	4	3.146	0.424	4.91562	0.6625	13.4774
	55	5	2.455	0.247	3.83594	0.385937	10.0611
	56	6	2.329	0	3.63906	0	0
block 6 image 8	57	1	4.475	0.32	6.99219	0.5	7.15084
	58	2	1.467	0	2.29219	0	0
	59	3	2.958	0.179	4.62188	0.279687	6.05139
	60	4	2.515	0.427	3.92969	0.667187	16.9781
	61	5	1.945	0	3.03906	0	0
	62	6	3.129	0	4.88906	0	0
	63	7	1.703	0	2.66094	0	0
	64	8	1.632	0	2.55	0	0
	65	9	4.167	0.725	6.51094	1.13281	17.3986
	66	10	1.949	0	3.04531	0	0
	67	11	2.12	0	3.3125	0	0
	68	12	1.722	1.147	2.69062	1.79219	66.6086
block 6 image 9	69	1	1.787	0.808	2.79219	1.2625	45.2154
	70	2	1.809	0.48	2.82656	0.75	26.534
	71	3	1.877	0.076	2.93281	0.11875	4.04901
	72	4	3.031	1.51	4.73594	2.35938	49.8185
	73	5	2.498	0.458	3.90313	0.715625	18.3347
	74	6	4.725	0.713	7.38281	1.11406	15.0899
	75	7	1.38	0	2.15625	0	0
	76	8	1.684	0.287	2.63125	0.448437	17.0428
	77	9	1.687	0	2.63594	0	0
	78	10	2.278	0.202	3.55938	0.315625	8.86743
	79	11	1.307	0.268	2.04219	0.41875	20.505
	80	12	1.878	0	2.93437	0	0
block 6 image 10	81	left	2.931	0.157	4.57969	0.245312	5.35653
	82	right	1.869	0	2.92031	0	0
block 6 image 11	83	1	3.791	0.331	5.92344	0.517188	8.73121
	84	2	2.065	0.77	3.22656	1.20312	37.2881
	85	3	3.607	0.083	5.63594	0.129688	2.30108
	86	4	2.648	0	4.1375	0	0
	87	5	3.068	0.139	4.79375	0.217188	4.53064
	88	6	1.929	0	3.01406	0	0
	89	7	1.116	0	1.74375	0	0
	90	8	1.937	0	3.02656	0	0
	91	9	2.794	0.177	4.36562	0.276562	6.335
	92	10	1.767	0	2.76094	0	0
block 6 image 12	93	1	3.815	0	5.96094	0	0
	94	2	1.136	0	1.775	0	0
	95	3	1.585	0	2.47656	0	0
	96	4	1.7	0.272	2.65625	0.425	16
	97	5	1.736	0.346	2.7125	0.540625	19.9309
	98	6	2.168	0.461	3.3875	0.720313	21.2638
	99	7	1.609	0.154	2.51406	0.240625	9.57116
	100	8	2.532	0.338	3.95625	0.528125	13.3491
	101	9	2.063	0.336	3.22344	0.525	16.287
	102	10	2.162	0	3.37812	0	0
	103	11	2.265	0.107	3.53906	0.167187	4.72406
	104	12	2.209	0	3.45156	0	0
	105	13	2.251	0	3.51719	0	0
	106	14	1.567	0	2.44844	0	0
	107	15	1.268	0	1.98125	0	0
	108	16	1.613	0.248	2.52031	0.3875	15.3751
	109	17	2.067	0	3.22969	0	0
	110	18	1.545	0	2.41406	0	0
	111	19	2.148	0.32	3.35625	0.5	14.8976
	112	20	1.365	0	2.13281	0	0
block 6 image 13	113	top	1.71	0	2.67188	0	0
	114	bottom	2.23	0	3.48438	0	0
block 6 image 14	115	1	2.588	0	4.04375	0	0
	116	2	2.862	0	4.47187	0	0
	117	3	0.83	0	1.29688	0	0
	118	4	1.113	0	1.73906	0	0
block 6 image 15	119	1	3.048	1.439	4.7625	2.24844	47.2113
	120	2	5.455	0.381	8.52344	0.595313	6.98442
	121	3	1.823	0.285	2.84844	0.445312	15.6336
	122	4	1.838	0.27	2.87188	0.421875	14.6899
	123	5	3.23	0.722	5.04688	1.12813	22.3529
	124	6	1.998	0.595	3.12188	0.929688	29.7798
	125	7	1.949	0.504	3.04531	0.7875	25.8594
	126	8	1.693	0.158	2.64531	0.246875	9.33255
	127	9	1.536	0	2.4	0	0
	128	10	1.608	0	2.5125	0	0
block 6 image 16	129	1	4.56	0.138	7.125	0.215625	3.02632
	130	2	2.369	0.234	3.70156	0.365625	9.87759
	131	3	2.525	0	3.94531	0	0
	132	4	3.324	0	5.19375	0	0
	133	5	3.108	0.582	4.85625	0.909375	18.7259
	134	6	3.933	0.832	6.14531	1.3	21.1543
	135	7	2.805	0.983	4.38281	1.53594	35.0446
	136	8	2.857	0.258	4.46406	0.403125	9.03045
	137	9	3.465	0	5.41406	0	0
	138	10	2.671	0	4.17344	0	0
	139	11	2.609	0	4.07656	0	0
	140	12	2.403	0	3.75469	0	0
	141	13	3.085	0.657	4.82031	1.02656	21.2966
	142	14	1.982	0.712	3.09687	1.1125	35.9233
	143	15	1.964	0.171	3.06875	0.267188	8.70672
	144	16	3.163	0.336	4.94219	0.525	10.6228
block 6 image 17	145	1	1.772	0.547	2.76875	0.854688	30.8691
	146	2	2.818	0.693	4.40313	1.08281	24.5919
	147	3	3.112	0.572	4.8625	0.89375	18.3805
	148	4	2.565	0	4.00781	0	0
	149	5	2.774	0.26	4.33437	0.40625	9.37275
	150	6	3.122	0.164	4.87812	0.25625	5.25304
	151	7	2.431	0.272	3.79844	0.425	11.1888
	152	8	2.166	0	3.38437	0	0
		XBAR	2.35044	0.198717	3.67256	0.310495	8.60508
		SIGMA	0.90186	0.295264	1.40916	0.461349	13.0411
U2OS:GFP + untreated (block 4)
TEM image file	mito	location	length OMM	length ER-OMM	REAL L(OMM)	REAL L(ER-OMM)	% apposition
block 4 image 1	1	only	16.031	2.028	25.0484	3.16875	12.6505
block 4 image 2	2	1	6.183	2.69	9.66094	4.20312	43.5064
	3	2	7.06	3.208	11.0312	5.0125	45.4391
	4	3	4.459	1.07	6.96719	1.67188	23.9964
block 4 image 3	5	left	2.969	1.891	4.63906	2.95469	63.6915
	6	right	6.118	2.629	9.55938	4.10781	42.9716
block 4 image 4	7	1	1.956	0.157	3.05625	0.245312	8.02658
	8	2	2.084	0.929	3.25625	1.45156	44.5777
	9	3	7.867	2.117	12.2922	3.30781	26.9099
	10	4	2.631	1.318	4.11094	2.05938	50.095
	11	5	4.403	2.4	6.87969	3.75	54.5083
	12	6	3.181	1.162	4.97031	1.81562	36.5294
	13	7	2.261	0.835	3.53281	1.30469	36.9306
block 4 image 5	14	1	7.132	0	11.1437	0	0
	15	2	3.186	0	4.97813	0	0
	16	3	5.595	0.141	8.74219	0.220312	2.52011
	17	4	2.251	0.443	3.51719	0.692187	19.6801
	18	5	2.782	0.592	4.34687	0.925	21.2797
block 4 image 6	19	1	5.094	1.127	7.95938	1.76094	22.1241
	20	2	2.279	0.481	3.56094	0.751563	21.1057
	21	3	2.486	0.91	3.88438	1.42188	36.605
	22	4	2.266	0.656	3.54062	1.025	28.9497
	23	5	1.773	0.485	2.77031	0.757812	27.3548
	24	6	4.513	0.522	7.05156	0.815625	11.5666
block 4 image 7	25	1	2.83	1.345	4.42188	2.10156	47.5265
	26	2	1.24	0.372	1.9375	0.58125	30
	27	3	5.116	1.678	7.99375	2.62187	32.7991
	28	4	2.096	0.35	3.275	0.546875	16.6985
	29	5	2.045	0.632	3.19531	0.9875	30.9046
	30	6	2.438	0.68	3.80938	1.0625	27.8917
	31	7	2.693	0.764	4.20781	1.19375	28.3698
block 4 image 8	32	1	2.833	1.2	4.42656	1.875	42.3579
	33	2	2.908	1.314	4.54375	2.05313	45.1857
	34	3	3.651	1.705	5.70469	2.66406	46.6995
	35	4	2.275	0.456	3.55469	0.7125	20.044
	36	5	7.132	3.45	11.1437	5.39062	48.3735
	37	6	3.128	1.071	4.8875	1.67344	34.2391
	38	7	4.497	1.384	7.02656	2.1625	30.7761
block 4 image 9	39	1	4.098	1.21	6.40313	1.89062	29.5266
	40	2	3.963	0.74	6.19219	1.15625	18.6727
	41	3	3.232	1.5	5.05	2.34375	46.4109
	42	4	2.007	0.434	3.13594	0.678125	21.6243
block 4 image 10	43	1	2.522	1.304	3.94062	2.0375	51.705
	44	2	2.995	0.932	4.67969	1.45625	31.1185
	45	3	3.201	0.618	5.00156	0.965625	19.3065
	46	4	4.962	2.165	7.75312	3.38281	43.6316
	47	5	2.358	0.817	3.68438	1.27656	34.648
	48	6	1.77	0.766	2.76562	1.19687	43.2768
	49	7	2.301	0.995	3.59531	1.55469	43.2421
	50	8	2.58	1.305	4.03125	2.03906	50.5814
	51	9	2.429	1.122	3.79531	1.75313	46.1918
	52	10	1.751	0.939	2.73594	1.46719	53.6265
	53	11	2.914	0.658	4.55313	1.02812	22.5806
	54	12	3.098	1.419	4.84063	2.21719	45.8037
block 4 image 11	55	1	3.644	1.809	5.69375	2.82656	49.6432
	56	2	1.97	0.364	3.07812	0.56875	18.4772
	57	3	2.593	0.649	4.05156	1.01406	25.0289
	58	4	2.951	0.765	4.61094	1.19531	25.9234
block 4 image 12	59	1	2.134	1.158	3.33437	1.80937	54.2643
	60	2	2.859	1.831	4.46719	2.86094	64.0434
	61	3	4.108	3.607	6.41875	5.63594	87.8043
	62	4	1.749	0.796	2.73281	1.24375	45.5117
	63	5	4.208	1.372	6.575	2.14375	32.6046
	64	6	1.98	1.085	3.09375	1.69531	54.798
	65	7	1.885	0.315	2.94531	0.492188	16.7109
block 4 image 13	66	1	2.155	1.427	3.36719	2.22969	66.2181
	67	2	2.088	0.168	3.2625	0.2625	8.04598
	68	3	2.668	0.888	4.16875	1.3875	33.2834
	69	4	5.148	0.436	8.04375	0.68125	8.46931
	70	5	6.501	1.465	10.1578	2.28906	22.535
	71	6	2.094	1.012	3.27187	1.58125	48.3286
block 4 image 14	72	1	3.813	1.763	5.95781	2.75469	46.2366
	73	2	3.92	1.211	6.125	1.89219	30.8929
	74	3	3.535	1.806	5.52344	2.82187	51.0891
	75	4	3.3	0.834	5.15625	1.30313	25.2727
	76	5	3.915	0.822	6.11719	1.28437	20.9962
block 4 image 15	77	1	4.041	2.717	6.31406	4.24531	67.2358
	78	2	3.032	0.929	4.7375	1.45156	30.6398
	79	3	2.261	1.476	3.53281	2.30625	65.2808
	80	4	2.281	1.496	3.56406	2.3375	65.5853
	81	5	6.179	2.082	9.65469	3.25312	33.6948
	82	6	2.226	0.616	3.47812	0.9625	27.673
		XBAR	3.4983	1.17091	5.4661	1.82955	35.2575
		SIGMA	2.03634	0.757682	3.18178	1.18388	17.1133
U2OS:GFP + 4h CCCP (block 2)
TEM image file	mito	location	length OMM	length ER-OMM	REAL L(OMM)	REAL L(ER-OMM)	% apposition
block 2 image 1	1	1	2.881	2.423	4.50156	3.78594	84.1027
	2	2	2.197	0.608	3.43281	0.95	27.6741
	3	3	2.184	0.253	3.4125	0.395313	11.5842
	4	4	2.792	0.766	4.3625	1.19687	27.4355
	5	5	1.474	0.631	2.30313	0.985938	42.8087
block 2 image 2	6	1	2.027	0.759	3.16719	1.18594	37.4445
	7	2	2.418	0.809	3.77813	1.26406	33.4574
	8	3	2.564	0.889	4.00625	1.38906	34.6724
	9	4	2.669	1.093	4.17031	1.70781	40.9517
	10	5	2.46	0.664	3.84375	1.0375	26.9919
	11	6	2.082	0	3.25312	0	0
block 2 image 3	12	1	3.932	0.864	6.14375	1.35	21.9736
	13	2	6.235	1.52	9.74219	2.375	24.3785
	14	3	4.382	0.691	6.84687	1.07969	15.7691
	15	4	2.294	0.293	3.58438	0.457812	12.7724
	16	5	3.354	1.876	5.24063	2.93125	55.9332
	17	6	2.661	0.891	4.15781	1.39219	33.4837
	18	7	3.255	0.386	5.08594	0.603125	11.8587
block 2 image 4	19	1	5.678	4.053	8.87187	6.33281	71.3808
	20	2	3.593	2.652	5.61406	4.14375	73.8102
	21	3	2.49	1.687	3.89063	2.63594	67.751
	22	4	1.925	0.644	3.00781	1.00625	33.4545
	23	5	5.742	0.827	8.97188	1.29219	14.4026
	24	6	2.838	0.865	4.43438	1.35156	30.4792
block 2 image 5	25	1	1.373	0.175	2.14531	0.273438	12.7458
	26	2	2.813	0.148	4.39531	0.23125	5.26129
	27	3	1.968	0.281	3.075	0.439063	14.2785
	28	4	1.654	0.693	2.58437	1.08281	41.8984
	29	5	2.934	0.791	4.58438	1.23594	26.9598
	30	6	2.289	0.688	3.57656	1.075	30.0568
	31	7	1.975	0.559	3.08594	0.873437	28.3038
block 2 image 6	32	1	3.579	1.951	5.59219	3.04844	54.5124
	33	2	1.438	1.011	2.24687	1.57969	70.306
	34	3	1.904	0.554	2.975	0.865625	29.0966
	35	4	1.96	0.702	3.0625	1.09687	35.8163
	36	5	2.28	0.951	3.5625	1.48594	41.7105
	37	6	3.317	0.62	5.18281	0.96875	18.6916
	38	7	3.304	1.297	5.1625	2.02656	39.2554
	39	8	3.567	2.33	5.57344	3.64062	65.321
block 2 image 7	40	1	2.269	0.394	3.54531	0.615625	17.3645
	41	2	3.534	0.941	5.52187	1.47031	26.6271
	42	3	1.662	0.601	2.59687	0.939062	36.1613
	43	4	3.478	0.898	5.43438	1.40312	25.8194
	44	5	1.77	0.263	2.76562	0.410938	14.8588
	45	6	2.144	0.356	3.35	0.55625	16.6045
	46	7	0.906	0.125	1.41563	0.195312	13.7969
	47	8	1.651	0.314	2.57969	0.490625	19.0188
	48	9	2.278	0.83	3.55938	1.29688	36.4355
	49	10	1.402	0.331	2.19062	0.517188	23.6091
	50	11	1.323	0.184	2.06719	0.2875	13.9078
	51	12	2.102	0.862	3.28437	1.34688	41.0086
	52	13	1.995	0.422	3.11719	0.659375	21.1529
	53	14	1.671	0.469	2.61094	0.732812	28.067
	54	15	2.715	0.452	4.24219	0.70625	16.6483
	55	16	1.702	1.147	2.65937	1.79219	67.3913
	56	17	1.482	0	2.31562	0	0
	57	18	0.972	0.2	1.51875	0.3125	20.5761
	58	19	1.534	0.676	2.39688	1.05625	44.0678
	59	20	1.225	0.524	1.91406	0.81875	42.7755
	60	21	1.215	0.667	1.89844	1.04219	54.8971
block 2 image 8	61	1	5.021	1.521	7.84531	2.37656	30.2928
	62	2	2.481	0.366	3.87656	0.571875	14.7521
	63	3	3.14	1.455	4.90625	2.27344	46.3376
	64	4	4.332	1.355	6.76875	2.11719	31.2789
	65	5	2.478	1.1247	3.87188	1.75734	45.3874
	66	6	2.324	0.82	3.63125	1.28125	35.284
	67	7	3.232	1.505	5.05	2.35156	46.5656
	68	8	1.414	0.433	2.20938	0.676562	30.6223
	69	9	1.36	0.571	2.125	0.892187	41.9853
	70	10	2.69	0.311	4.20312	0.485938	11.5613
	71	11	2.238	0.249	3.49688	0.389062	11.126
	72	12	2.695	0.532	4.21094	0.83125	19.7403
block 2 image 9	73	1	2.683	0.792	4.19219	1.2375	29.5192
	74	2	3.316	1.185	5.18125	1.85156	35.7358
	75	3	3.185	0.407	4.97656	0.635937	12.7786
	76	4	2.134	0.597	3.33437	0.932812	27.9756
	77	5	3.26	2.544	5.09375	3.975	78.0368
	78	6	2.237	1.643	3.49531	2.56719	73.4466
	79	7	1.67	0.556	2.60938	0.86875	33.2934
	80	8	3.729	1.388	5.82656	2.16875	37.2218
	81	9	1.396	0	2.18125	0	0
	82	10	2.937	0.526	4.58906	0.821875	17.9094
	83	11	1.589	0.583	2.48281	0.910937	36.6897
	84	12	1.961	0.53	3.06406	0.828125	27.027
	85	13	1.983	1.549	3.09844	2.42031	78.114
block 2 image 10	86	1	1.159	0.969	1.81094	1.51406	83.6066
	87	2	3.019	1.384	4.71719	2.1625	45.843
	88	3	2.998	0.515	4.68438	0.804688	17.1781
	89	4	2.498	1.63	3.90313	2.54688	65.2522
	90	5	2.461	1.43	3.84531	2.23438	58.1065
	91	6	2.812	0.811	4.39375	1.26719	28.8407
	92	7	5.74	1.862	8.96875	2.90938	32.439
block 2 image 11	93	1	2.886	0.414	4.50938	0.646875	14.3451
	94	2	2.62	1.1551	4.09375	1.80484	44.0878
	95	3	2.755	0.96	4.30469	1.5	34.8457
	96	4	1.635	0.761	2.55469	1.18906	46.5443
	97	5	2.999	0.603	4.68594	0.942187	20.1067
	98	6	3.443	1.461	5.37969	2.28281	42.4339
block 2 image 12	99	1	4.092	2.384	6.39375	3.725	58.26
	100	2	1.427	0.663	2.22969	1.03594	46.4611
	101	3	2.711	1.573	4.23594	2.45781	58.0229
	102	4	3.221	1.697	5.03281	2.65156	52.6855
block 2 image 13	103	1	4.434	0.826	6.92813	1.29063	18.6288
	104	2	2.631	1.325	4.11094	2.07031	50.3611
	105	3	5.496	1.67	8.5875	2.60938	30.3857
	106	4	4.566	1.524	7.13437	2.38125	33.3771
	107	5	7.267	0.986	11.3547	1.54062	13.5682
block 2 image 14	108	1	5.534	1.129	8.64687	1.76406	20.4012
	109	2	4.085	0.732	6.38281	1.14375	17.9192
	110	3	2.938	1.04	4.59063	1.625	35.3982
	111	4	5.592	1.693	8.7375	2.64531	30.2754
	112	5	2.584	0.925	4.0375	1.44531	35.7972
	113	6	1.607	0.163	2.51094	0.254688	10.1431
	114	7	2.148	0.18	3.35625	0.28125	8.37989
	115	8	1.693	0.276	2.64531	0.43125	16.3024
	116	9	1.433	0.552	2.23906	0.8625	38.5206
	117	10	3.649	0.642	5.70156	1.00313	17.5939
	118	11	2.307	0.316	3.60469	0.49375	13.6974
	119	12	4.267	1.054	6.66719	1.64688	24.7012
block 2 image 15	120	1	3.215	1.02	5.02344	1.59375	31.7263
	121	2	2.241	0.746	3.50156	1.16562	33.2887
	122	3	3.153	0	4.92656	0	0
	123	4	2.06	0.233	3.21875	0.364063	11.3107
	124	5	3.371	1.907	5.26719	2.97969	56.5708
	125	6	2.364	0.24	3.69375	0.375	10.1523
	126	7	2.175	0.272	3.39844	0.425	12.5057
	127	8	2.225	0	3.47656	0	0
	128	9	2.551	0.491	3.98594	0.767188	19.2474
	129	10	3.137	0.208	4.90156	0.325	6.63054
		XBAR	2.7302	0.872216	4.26594	1.36284	32.0015
		SIGMA	1.17178	0.643284	1.83091	1.00513	19.1323

## Sheet: 1E
Numerical source data for Figure 1E
U2OS:GFP-parkin untreated		U2OS:GFP-parkin CCCP				U2OS:GFP untreated			U2OS:GFP-parkin CCCP
TEM image file	% in contact		TEM image file	% in contact		TEM image file	% in contact		TEM image file	% in contact
block 8 image 1	100		block 6 image 1	85.7143		block 4 image 1	100		block 2 image 1	100
block 8 image 2	100		block 6 image 2	40		block 4 image 2	100		block 2 image 2	83.3333
block 8 image 3	100		block 6 image 3	21.4286		block 4 image 3	100		block 2 image 3	100
block 8 image 4	100		block 6 image 4	50		block 4 image 4	100		block 2 image 4	100
block 8 image 5	100		block 6 image 5	28.5714		block 4 image 5	60		block 2 image 5	100
block 8 image 6	100		block 6 image 6	9.09091		block 4 image 6	100		block 2 image 6	100
block 8 image 7	100		block 6 image 7	33.33		block 4 image 7	100		block 2 image 7	95.2381
block 8 image 8	66.67		block 6 image 8	41.6667		block 4 image 8	100		block 2 image 8	100
block 8 image 9	100		block 6 image 9	75		block 4 image 9	100		block 2 image 9	92.3077
block 8 image 10	66.67		block 6 image 10	50		block 4 image 10	100		block 2 image 10	100
block 8 image 11	100		block 6 image 11	50		block 4 image 11	100		block 2 image 11	100
block 8 image 12	100		block 6 image 12	45		block 4 image 12	100		block 2 image 12	100
block 8 image 13	100		block 6 image 13	0		block 4 image 13	100		block 2 image 13	100
block 8 image 14	100		block 6 image 14	0		block 4 image 14	100		block 2 image 14	100
block 8 image 15	100		block 6 image 15	80		block 4 image 15	100		block 2 image 15	80
block 8 image 16	100		block 6 image 16	62.5
block 8 image 17	100		block 6 image 17	75
block 8 image 18	100
block 8 image 19	100
XBAR	96.4916		XBAR	43.9589		XBAR	97.3333		XBAR	96.7253
SIGMA	10.509		SIGMA	26.6725		SIGMA	10.328		SIGMA	6.53981

## Sheet: 1I
Numerical source data for Figure 1I
block 1					conversion: 0.5 um = 0.45
image file	mito	location	P(mito)	L(ER-mito)	real P(mito)	% app
block 1 image 1	1	1	1.802	1.068	2.00222	59.2675		block 1	ctrl siRNA
	2	2	2.257	1.368	2.50778	60.6114		block 3	siPINK1
	3	3	2.772	1.352	3.08	48.7734		block 4	ctrl siRNA + MG132
	4	4	1.773	0.338	1.97	19.0637		block 5	ctrl siRNA + CCCP
	5	5	1.844	0.731	2.04889	39.6421		block 7	siPINK1 + CCCP
block 1 image 2	6	1	3.283	2.189	3.64778	66.6768		block 8	ctrl siRNA + MG132 + CCCP
	7	2	2.11	0.541	2.34444	25.6398
	8	3	2.7	1.321	3	48.9259
	9	4	4.475	2.053	4.97222	45.8771
	10	5	2.063	0.405	2.29222	19.6316
	11	6	1.952	0.768	2.16889	39.3443
	12	7	1.97	0.32	2.18889	16.2437
	13	8	2.88	1.906	3.2	66.1806
	14	9	1.896	1.291	2.10667	68.0907
	15	10	1.303	0.221	1.44778	16.9609
block 1 image 3	16	1	3.125	0.568	3.47222	18.176
	17	2	3.378	1.836	3.75333	54.3517
	18	3	5.721	1.575	6.35667	27.5302
	19	4	1.213	0.774	1.34778	63.8087
	20	5	3.045	1.13	3.38333	37.11
	21	6	3.23	0.533	3.58889	16.5015
block 1 image 4	22	1	11.921	6.792	13.2456	56.9751
	23	2	3.268	1.759	3.63111	53.825
	24	3	3.759	1.456	4.17667	38.7337
block 1 image 5	25	1	3.365	1.704	3.73889	50.6389
	26	2	3.188	1.181	3.54222	37.0452
	27	3	1.618	0.34	1.79778	21.0136
	28	4	1.53	0.569	1.7	37.1895
	29	5	3.921	1.253	4.35667	31.9561
	30	6	1.219	0.747	1.35444	61.2797
	31	7	1.772	1.191	1.96889	67.2122
	32	8	2.033	0.807	2.25889	39.695
	33	9	2.049	1.44	2.27667	70.2782
	34	10	3.111	2.211	3.45667	71.0704
	35	11	3.943	0.333	4.38111	8.44535
	36	12	2.008	0.371	2.23111	18.4761
block 1 image 6	37	1	2.176	0.366	2.41778	16.8199
	38	2	2.806	1.03	3.11778	36.7071
	39	3	2.502	0.8973	2.78	35.8633
	40	4	0.93	0.449	1.03333	48.2796
	41	5	2.473	0.569	2.74778	23.0085
	42	6	2.543	1.289	2.82556	50.6882
	43	7	2.148	1.114	2.38667	51.8622
	44	8	2.398	1.188	2.66444	49.5413
	45	9	1.939	0.731	2.15444	37.6998
	46	10	2.435	0	2.70556	0
	47	11	2.648	1.428	2.94222	53.9275
	48	12	2.847	1.361	3.16333	47.8047
	49	13	0.994	0.14	1.10444	14.0845
	50	14	2.08	0.455	2.31111	21.875
	51	15	1.219	0.21	1.35444	17.2272
block 1 image 7	52	1	2.591	1.094	2.87889	42.2231
	53	2	2.016	0.446	2.24	22.123
	54	3	6.511	1.492	7.23444	22.9151
	55	4	2.227	0.3	2.47444	13.471
	56	5	2.282	2.246	2.53556	98.4224
	57	6	3.136	1.321	3.48444	42.1237
	58	7	2.213	0.77	2.45889	34.7944
	59	8	1.894	0.923	2.10444	48.7328
	60	9	2.894	1.189	3.21556	41.085
block 1 image 8	61	1	2.561	0.609	2.84556	23.7798
	62	2	2.372	1.105	2.63556	46.5852
	63	3	1.953	0.615	2.17	31.49
	64	4	2.795	0.424	3.10556	15.1699
	65	5	1.965	0.922	2.18333	46.9211
block 1 image 9	66	1	1.68	0.69	1.86667	41.0714
	67	2	2.066	1.31	2.29556	63.4076
	68	3	2.773	0.839	3.08111	30.256
	69	4	2.235	0.193	2.48333	8.63535
	70	5	1.263	0.568	1.40333	44.9723
	71	6	3.465	1.514	3.85	43.6941
	72	7	3.23	0.917	3.58889	28.3901
block 1 image 10	73	1	3.098	1.343	3.44222	43.3505
	74	2	4.749	2.381	5.27667	50.1369
	75	3	6.301	2.185	7.00111	34.677
	76	4	5.778	0.796	6.42	13.7764
	77	5	3.159	0.294	3.51	9.30674
	78	6	1.766	0.389	1.96222	22.0272
	79	7	1.874	0.461	2.08222	24.5998
	80	8	2.801	0.741	3.11222	26.4548
	81	9	13.406	5.411	14.8956	40.3625
	82	10	4.492	1.524	4.99111	33.927
block 1 image 11	83	1	2.811	2.162	3.12333	76.9121
	84	2	1.573	0.509	1.74778	32.3586
	85	3	2.383	0.466	2.64778	19.5552
	86	4	4.142	3.511	4.60222	84.7658
	87	5	1.494	0.632	1.66	42.3025
	88	6	1.608	0.439	1.78667	27.301
	89	7	1.818	1.389	2.02	76.4026
	90	8	5.629	3.981	6.25444	70.723
	91	9	2.445	1.923	2.71667	78.6503
block 1 image 12	92	1	2.584	0.305	2.87111	11.8034
	93	2	4.019	0.532	4.46556	13.2371
	94	3	4.711	1.471	5.23444	31.2248
	95	4	2.375	0.875	2.63889	36.8421
	96	5	1.978	1.534	2.19778	77.5531
	97	6	1.057	0.403	1.17444	38.1268
	98	7	3.081	2.09	3.42333	67.8351
	99	8	1.118	0.809	1.24222	72.3614
	100	9	2.021	1.579	2.24556	78.1296
	101	10	0.97	0.379	1.07778	39.0722
	102	11	1.083	0.097	1.20333	8.9566
	103	12	0.931	0.18	1.03444	19.334
	104	13	1.68	0.522	1.86667	31.0714
	105	14	2.608	0.255	2.89778	9.77761
	106	15	4.018	0.297	4.46444	7.39174
block 1 image 13	107	1	3.016	0.462	3.35111	15.3183
	108	2	2.425	0.714	2.69444	29.4433
	109	3	1.281	0.416	1.42333	32.4746
	110	4	1.352	0	1.50222	0
block 1 image 14	111	1	2.257	1.576	2.50778	69.8272
	112	2	2.814	1.272	3.12667	45.2026
	113	3	2.264	0.254	2.51556	11.2191
	114	4	2.002	0.675	2.22444	33.7163
	115	5	3.075	0.546	3.41667	17.7561
	116	6	1.24	0.145	1.37778	11.6935
block 1 image 15	117	1	2.924	1.083	3.24889	37.0383
	118	2	2.458	2.26	2.73111	91.9447
	119	3	2.125	0.726	2.36111	34.1647
	120	4	1.728	1.063	1.92	61.5162
	121	5	2.622	0.935	2.91333	35.6598
	122	6	1.952	1.597	2.16889	81.8135
		XBAR	2.71191	1.07168	3.01323	39.1556
		SIGMA	1.69459	0.948704	1.88288	21.4363
block 3
image file	mito	location	P(mito)	L(ER-mito)	real P(mito)	% app
block 3 image 1	1	1	2.299	0	2.55444	0
	2	2	3.373	0.564	3.74778	16.721
	3	3	2.783	0.493	3.09222	17.7147
	4	4	1.495	0.777	1.66111	51.9732
	5	5	1.868	0.533	2.07556	28.5332
	6	6	2.429	0.284	2.69889	11.6921
	7	7	2.21	0.924	2.45556	41.81
	8	8	2.689	0.592	2.98778	22.0156
	9	9	10.261	3.136	11.4011	30.5623
	10	10	4.977	0.812	5.53	16.315
	11	11	2.557	1.22	2.84111	47.7122
	12	12	2.413	0.495	2.68111	20.5139
	13	13	2.539	0.788	2.82111	31.0358
block 3 image 2	14	1	2.514	1.428	2.79333	56.8019
	15	2	2.641	1.873	2.93444	70.9201
	16	3	1.899	0.414	2.11	21.8009
	17	4	1.55	0.178	1.72222	11.4839
	18	5	1.284	0.241	1.42667	18.7695
	19	6	5.981	1.366	6.64556	22.839
	20	7	3.635	1.622	4.03889	44.6217
	21	8	1.99	0.345	2.21111	17.3367
	22	9	6.34	2.103	7.04444	33.1703
	23	10	2.042	0.371	2.26889	18.1685
	24	11	2.368	0.787	2.63111	33.2348
	25	12	2.185	0.416	2.42778	19.0389
block 3 image 3	26	1	2.007	0	2.23	0
	27	2	2.329	0.876	2.58778	37.6127
	28	3	2.282	0.162	2.53556	7.09904
	29	4	2.224	0.606	2.47111	27.2482
	30	5	2.093	0	2.32556	0
	31	6	1.97	0.468	2.18889	23.7563
	32	7	2.885	0.531	3.20556	18.4055
	33	8	2.246	0.749	2.49556	33.3482
	34	9	1.264	0.641	1.40444	50.712
	35	10	2.558	0.15	2.84222	5.86396
	36	11	1.982	0.122	2.20222	6.1554
	37	12	1.304	0.25	1.44889	19.1718
	38	13	2.755	0.147	3.06111	5.33575
block 3 image 4	39	1	1.823	0	2.02556	0
	40	2	1.998	0	2.22	0
	41	3	2.614	0.546	2.90444	20.8875
	42	4	5.832	1.135	6.48	19.4616
	43	5	2.193	0.131	2.43667	5.97355
	44	6	2.209	1.051	2.45444	47.5781
	45	7	2.694	0.134	2.99333	4.97402
	46	8	2.066	0.207	2.29556	10.0194
	47	9	2.654	0	2.94889	0
	48	10	1.885	0.947	2.09444	50.2387
block 3 image 5	49	1	1.613	0.829	1.79222	51.3949
	50	2	9.672	1.403	10.7467	14.5058
	51	3	3.175	0.309	3.52778	9.73228
	52	4	1.767	0.46	1.96333	26.0328
	53	5	1.95	0.54	2.16667	27.6923
	54	6	5.117	0.619	5.68556	12.0969
	55	7	4.056	0.409	4.50667	10.0838
block 3 image 6	56	1	2.433	0.661	2.70333	27.1681
	57	2	3.597	1.123	3.99667	31.2205
	58	3	1.429	0.498	1.58778	34.8495
	59	4	1.924	0.449	2.13778	23.3368
	60	5	3.845	0.921	4.27222	23.9532
	61	6	2.604	0.199	2.89333	7.64209
	62	7	7.292	2.657	8.10222	36.4372
block 3 image 7	63	1	2.397	0.268	2.66333	11.1806
	64	2	6.236	1.1576	6.92889	18.5632
	65	3	1.714	0.565	1.90444	32.9638
	66	4	1.953	0.395	2.17	20.2253
	67	5	3.441	1.373	3.82333	39.9012
	68	6	1.388	0.506	1.54222	36.4553
	69	7	2.292	0.138	2.54667	6.02094
	70	8	2.188	0.311	2.43111	14.2139
	71	9	1.012	0.667	1.12444	65.9091
block 3 image 8	72	1	2.356	0.929	2.61778	39.4312
	73	2	2.174	0.237	2.41556	10.9016
	74	3	5.754	0.202	6.39333	3.5106
	75	4	1.363	0.411	1.51444	30.1541
	76	5	3.478	0.935	3.86444	26.8833
	77	6	1.646	1.18	1.82889	71.6889
	78	7	5.153	0.87	5.72556	16.8834
block 3 image 9	79	1	3.378	0.495	3.75333	14.6536
	80	2	3.895	1.668	4.32778	42.8241
	81	3	3.904	0.649	4.33778	16.624
	82	4	4.798	1.799	5.33111	37.4948
	83	5	3.035	0.954	3.37222	31.4333
	84	6	8.995	3.265	9.99444	36.2979
	85	7	7.076	2.822	7.86222	39.8813
	86	8	2.428	0.318	2.69778	13.0972
block 3 image 10	87	1	2.673	0.181	2.97	6.77142
	88	2	2.17	0	2.41111	0
	89	3	3.633	0.755	4.03667	20.7817
	90	4	3.458	0	3.84222	0
	91	5	2.431	0.181	2.70111	7.4455
	92	6	7.562	1.043	8.40222	13.7926
	93	7	1.55	0	1.72222	0
block 3 image 11	94	1	2.469	0.221	2.74333	8.95099
	95	2	1.975	0.613	2.19444	31.038
	96	3	1.881	0.321	2.09	17.0654
	97	4	1.818	0	2.02	0
	98	5	2.48	0	2.75556	0
block 3 image 12	99	1	1.551	0.594	1.72333	38.2979
	100	2	3.673	0.317	4.08111	8.63055
	101	3	3.034	0.758	3.37111	24.9835
	102	4	4.536	1.367	5.04	30.1367
	103	5	3.148	0	3.49778	0
	104	6	1.64	0	1.82222	0
block 3 image 13	105	1	4.221	1.759	4.69	41.6726
	106	2	2.025	0.127	2.25	6.2716
	107	3	4.387	0.84	4.87444	19.1475
	108	4	4.464	1.01	4.96	22.6254
	109	5	2.578	0.719	2.86444	27.8898
	110	6	3.472	1.388	3.85778	39.977
	111	7	4.938	1.16	5.48667	23.4913
	112	8	2.25	1.387	2.5	61.6444
block 3 image 14	113	1	6.053	2.351	6.72556	38.8402
	114	2	5.788	3.044	6.43111	52.5916
	115	3	4.828	3.549	5.36444	73.5087
block 3 image 15	116	1	5.125	1.794	5.69444	35.0049
	117	2	3.318	1.901	3.68667	57.2936
	118	3	4.415	2.782	4.90556	63.0125
block 3 image 16	119	1	3.152	1.33	3.50222	42.1954
	120	2	1.532	0.434	1.70222	28.329
	121	3	5.639	2.009	6.26556	35.6269
	122	4	16.197	2.489	17.9967	15.367
		XBAR	3.2687	0.821562	3.63189	24.6258
		SIGMA	2.11891	0.783301	2.35434	17.7555
block 4
image file	mito	location	P(mito)	L(ER-mito)	real P(mito)	% app
block 4 image 2	1	1	2.227	0	2.47444	0
	2	2	4.733	0.889	5.25889	18.783
block 4 image 3	3	1	5.248	1.126	5.83111	21.4558
	4	2	1.666	0.415	1.85111	24.91
	5	3	7.635	0.207	8.48333	2.7112
	6	4	2.602	0.451	2.89111	17.3328
	7	5	6.001	0.674	6.66778	11.2315
	8	6	2.012	0.43	2.23556	21.3718
block 4 image 4	9	1	3.001	0.613	3.33444	20.4265
	10	2	2.144	0.576	2.38222	26.8657
	11	3	5.318	1.123	5.90889	21.117
	12	4	5.213	1.245	5.79222	23.8826
	13	5	3.588	1.317	3.98667	36.7057
	14	6	2.319	1.025	2.57667	44.2001
	15	7	1.36	0.274	1.51111	20.1471
	16	8	2.025	0.655	2.25	32.3457
	17	9	1.274	0.569	1.41556	44.6625
block 4 image 5	18	1	2.241	0.678	2.49	30.2544
	19	2	1.14	0.281	1.26667	24.6491
	20	3	1.137	0.559	1.26333	49.1645
	21	4	4.465	0.83	4.96111	18.589
	22	5	2.858	1.211	3.17556	42.3723
	23	6	3.877	1.632	4.30778	42.0944
block 4 image 6	24	1	5.734	1.959	6.37111	34.1646
	25	2	1.481	0.209	1.64556	14.1121
	26	3	4.064	1.715	4.51556	42.1998
	27	4	1.404	0.165	1.56	11.7521
block 4 image 7	28	1	9.782	2.727	10.8689	27.8777
	29	2	2.016	0.839	2.24	41.6171
	30	3	2.164	0.391	2.40444	18.0684
	31	4	1.524	0.332	1.69333	21.7848
block 4 image 8	32	1	0.872	0.193	0.968889	22.133
	33	2	1.521	0.89	1.69	58.5141
	34	3	1.591	0.166	1.76778	10.4337
	35	4	1.509	0.47	1.67667	31.1465
	36	5	3.632	1.402	4.03556	38.6013
	37	6	3.02	1.676	3.35556	55.4967
	38	7	1.827	1.174	2.03	64.2583
	39	8	2.455	0.951	2.72778	38.7373
	40	9	1.494	0.592	1.66	39.6252
block 4 image 9	41	1	2.296	0.675	2.55111	29.399
	42	2	2.079	0.493	2.31	23.7133
	43	3	1.553	0.23	1.72556	14.81
	44	4	1.53	0.171	1.7	11.1765
	45	5	5.247	0.589	5.83	11.2255
	46	6	1.225	0.151	1.36111	12.3265
	47	7	2.249	1.064	2.49889	47.3099
block 4 image 10	48	1	1.976	0.85	2.19556	43.0162
	49	2	1.526	0.269	1.69556	17.6278
	50	3	1.868	0.712	2.07556	38.1156
	51	4	2.195	0	2.43889	0
	52	5	1.217	0.306	1.35222	25.1438
	53	6	1.322	0.276	1.46889	20.8775
	54	7	1.293	0.252	1.43667	19.4896
	55	8	1.36	0.954	1.51111	70.1471
	56	9	1.236	0.526	1.37333	42.5566
	57	10	0.946	0	1.05111	0
	58	11	1.019	0.288	1.13222	28.263
	59	12	1.647	0.132	1.83	8.01457
block 4 image 11	60	1	2.633	0.747	2.92556	28.3707
	61	2	2.125	0.176	2.36111	8.28235
	62	3	2.858	0.53	3.17556	18.5444
	63	4	7.26	0.97	8.06667	13.3609
	64	5	2.512	0.897	2.79111	35.7086
	65	6	3.493	0.307	3.88111	8.78901
	66	7	1.982	1.023	2.20222	51.6145
	67	8	3.717	0.822	4.13	22.1146
block 4 image 12	68	1	1.951	0.721	2.16778	36.9554
	69	2	3.621	1.586	4.02333	43.8001
	70	3	2.222	1.137	2.46889	51.1701
	71	4	1.605	1.406	1.78333	87.6012
	72	5	1.849	1.586	2.05444	85.7761
block 4 image 13	73	1	2.766	0.576	3.07333	20.8243
	74	2	2.006	0.508	2.22889	25.324
	75	3	1.127	0.683	1.25222	60.6034
	76	4	1.187	0.299	1.31889	25.1896
	77	5	2.756	0.631	3.06222	22.8955
	78	6	3.344	0.891	3.71556	26.6447
	79	7	1.411	0.127	1.56778	9.00071
	80	8	1.566	0.454	1.74	28.9911
	81	9	6.165	2.511	6.85	40.7299
	82	10	4.548	0.536	5.05333	11.7854
	83	11	1.337	0	1.48556	0
	84	12	2.111	0.364	2.34556	17.243
	85	13	1.734	0.43	1.92667	24.7982
block 4 image 14	86	1	2.913	1.438	3.23667	49.3649
	87	2	4.027	2.234	4.47444	55.4755
	88	3	1.005	0.464	1.11667	46.1692
	89	4	2.04	0.912	2.26667	44.7059
block 4 image 15	90	1	1.135	0.245	1.26111	21.5859
	91	2	1.342	1.248	1.49111	92.9955
	92	3	1.673	0.575	1.85889	34.3694
	93	4	1.706	0.711	1.89556	41.6764
	94	5	1.432	0.461	1.59111	32.1927
	95	6	2.21	1.276	2.45556	57.7376
	96	7	1.639	0.307	1.82111	18.7309
	97	8	1.511	0.317	1.67889	20.9795
	98	9	2.331	1.038	2.59	44.5302
	99	10	1.979	0.389	2.19889	19.6564
	100	11	3.355	0	3.72778	0
	101	12	5.26	1.609	5.84444	30.5894
		XBAR	2.56834	0.870024	3.18775	31.4039
		SIGMA	1.61558	0.69643	2.28744	18.6379
block 5
image file	mito	location	P(mito)	L(ER-mito)	real P(mito)	% app
block 5 image 10	1	1	2.558	0	2.84222	0
	2	2	1.76	0.118	1.95556	6.70455
	3	3	1.269	0	1.41	0
	4	4	1.675	0	1.86111	0
	5	5	3.448	0	3.83111	0
	6	6	1.582	0	1.75778	0
	7	7	2.843	0.207	3.15889	7.28104
	8	8	3.36	0	3.73333	0
	9	9	2.677	0.306	2.97444	11.4307
	10	10	2.066	0.282	2.29556	13.6496
	11	11	1.073	0	1.19222	0
	12	12	1.988	0.334	2.20889	16.8008
	13	13	1.137	0.187	1.26333	16.4468
	14	14	2.837	0	3.15222	0
block 5 image 2	15	1	2.32	0.133	2.57778	5.73276
	16	2	2.023	0.134	2.24778	6.62383
	17	3	1.303	0.529	1.44778	40.5986
	18	4	2.286	0.407	2.54	17.804
	19	5	3.126	0	3.47333	0
	20	6	3.246	0.094	3.60667	2.89587
	21	7	0.582	0	0.646667	0
	22	8	1.045	0.108	1.16111	10.3349
	23	9	1.708	0	1.89778	0
	24	10	2.33	0.356	2.58889	15.279
	25	11	1.542	0	1.71333	0
	26	12	1.197	0	1.33	0
	27	13	3.062	0.148	3.40222	4.83344
	28	14	0.879	0.25	0.976667	28.4414
	29	15	0.868	0.392	0.964444	45.1613
	30	16	1.083	0	1.20333	0
	31	17	2.192	0.505	2.43556	23.0383
block 5 image 3	32	1	3.421	0	3.80111	0
	33	2	1.825	0	2.02778	0
	34	3	1.572	0	1.74667	0
	35	4	3.216	0	3.57333	0
	36	5	1.392	0	1.54667	0
	37	6	1.432	0	1.59111	0
	38	7	2.759	0	3.06556	0
block 5 image 4	39	1	1.758	0.256	1.95333	14.562
	40	2	2.274	0.592	2.52667	26.0334
	41	3	1.474	0	1.63778	0
	42	4	1.906	0.131	2.11778	6.87303
	43	5	3.218	0.161	3.57556	5.00311
	44	6	2.623	1.761	2.91444	67.1369
	45	7	2.347	0.452	2.60778	19.2586
	46	8	4.422	0.288	4.91333	6.51289
	47	9	1.787	0.64	1.98556	35.8142
block 5 image 5	48	1	1.917	0.588	2.13	30.6729
	49	2	1.469	0.124	1.63222	8.44112
	50	3	2.055	0.187	2.28333	9.09976
	51	4	2.899	0.313	3.22111	10.7968
	52	5	2.513	0.326	2.79222	12.9725
	53	6	3.177	0.254	3.53	7.99496
	54	7	3.675	0.471	4.08333	12.8163
	55	8	1.331	0.153	1.47889	11.4951
	56	9	1.179	0.168	1.31	14.2494
	57	10	2.544	0.375	2.82667	14.7406
	58	11	1.986	0.319	2.20667	16.0624
	59	12	1.626	0.296	1.80667	18.2042
	60	13	1.371	0.354	1.52333	25.8206
	61	14	2.185	0.07	2.42778	3.20366
	62	15	4.692	0.414	5.21333	8.82353
	63	16	1.577	0.122	1.75222	7.73621
	64	17	1.595	0	1.77222	0
	65	18	3.25	0.21	3.61111	6.46154
	66	19	2.484	0.122	2.76	4.91143
	67	20	1.668	0	1.85333	0
	68	21	1.315	0	1.46111	0
	69	22	2.274	0.51	2.52667	22.4274
	70	23	1.306	0	1.45111	0
block 5 image 6	71	1	1.314	0.515	1.46	39.1933
	72	2	2.947	0.507	3.27444	17.2039
	73	3	1.763	0.433	1.95889	24.5604
	74	4	6.81	0.303	7.56667	4.44934
	75	5	1.466	0	1.62889	0
	76	6	0.985	0	1.09444	0
	77	7	2.187	0.565	2.43	25.8345
	78	8	2.132	0.252	2.36889	11.8199
	79	10	2.647	0.563	2.94111	21.2694
	80	11	2.746	0.384	3.05111	13.984
	81	12	3.026	1.116	3.36222	36.8804
	82	13	2.34	0.248	2.6	10.5983
	83	14	1.28	0.108	1.42222	8.4375
	84	15	1.984	0.477	2.20444	24.0423
	85	16	5.377	1.606	5.97444	29.868
	86	17	2.703	0	3.00333	0
	87	18	1.773	0.461	1.97	26.0011
block 5 image 7	88	1	3.801	1.309	4.22333	34.4383
	89	2	2.546	0.998	2.82889	39.1987
	90	3	2.183	0.228	2.42556	10.4443
	91	4	3.038	1.145	3.37556	37.6893
	92	5	1.547	0.106	1.71889	6.85197
	93	6	1.166	0.121	1.29556	10.3774
	94	7	1.265	0.084	1.40556	6.64032
	95	8	1.579	0	1.75444	0
	96	9	2.453	0	2.72556	0
	97	10	2.49	0.994	2.76667	39.9197
	98	11	2.407	0.18	2.67444	7.47819
	99	12	1.708	0.19	1.89778	11.1241
	100	13	1.551	0.21	1.72333	13.5397
	101	14	1.401	0	1.55667	0
	102	15	1.438	0	1.59778	0
block 5 image 8	103	1	1.752	0.196	1.94667	11.1872
	104	2	2.473	0	2.74778	0
	105	3	1.465	0.276	1.62778	18.8396
	106	4	2.999	0.444	3.33222	14.8049
	107	5	1.362	0.261	1.51333	19.163
	108	6	1.246	0	1.38444	0
	109	7	1.436	0.526	1.59556	36.6295
	110	8	1.534	0	1.70444	0
	111	9	1.18	0	1.31111	0
	112	10	2.012	0	2.23556	0
	113	11	1.146	0	1.27333	0
block 5 image 9	114	1	0.964	0	1.07111	0
	115	2	1.021	0	1.13444	0
	116	3	1.344	0	1.49333	0
	117	4	0.961	0	1.06778	0
	118	5	1.242	0.402	1.38	32.3671
	119	6	1.21	0	1.34444	0
	120	7	1.74	0.176	1.93333	10.1149
	121	8	2.23	0	2.47778	0
	122	9	2.131	0.091	2.36778	4.2703
	123	10	1.365	0.11	1.51667	8.05861
	124	11	1.52	0.259	1.68889	17.0395
	125	12	0.801	0	0.89	0
	126	13	1.957	0	2.17444	0
	127	14	1.039	0	1.15444	0
	128	15	1.338	0.183	1.48667	13.6771
	129	16	2.158	0	2.39778	0
	130	17	1.062	0	1.18	0
	131	18	1.959	0.111	2.17667	5.66616
	132	19	1.862	0	2.06889	0
	133	20	1.487	0	1.65222	0
	134	21	2.08	0.133	2.31111	6.39423
	135	22	1.411	0	1.56778	0
	136	23	1.264	0.424	1.40444	33.5443
	137	24	2.104	0.136	2.33778	6.46388
	138	25	1.36	1.003	1.51111	73.75
	139	26	2.614	0.17	2.90444	6.50344
block 5 image 11	140	1	3.238	0	3.59778	0
	141	2	1.448	0	1.60889	0
	142	3	3.204	0	3.56	0
	143	4	1.318	0	1.46444	0
	144	5	1.657	0	1.84111	0
	145	6	2.621	0	2.91222	0
block 5 image 12	146	1	1.318	0.337	1.46444	25.569
	147	2	1.374	0	1.52667	0
	148	3	2.267	0	2.51889	0
	149	4	2.074	0	2.30444	0
	150	5	2.033	0	2.25889	0
	151	6	1.83	0.137	2.03333	7.48634
	152	7	1.189	0.094	1.32111	7.9058
	153	8	1.322	0.116	1.46889	8.77458
	154	9	1.295	0.111	1.43889	8.57143
	155	10	1.379	0.478	1.53222	34.6628
	156	11	1.963	0.468	2.18111	23.8411
	157	12	1.397	0	1.55222	0
	158	13	1.234	0.16	1.37111	12.966
	159	14	2.525	0	2.80556	0
	160	15	2.158	0.112	2.39778	5.18999
	161	16	1.996	0.153	2.21778	7.66533
	162	17	2.328	0	2.58667	0
	163	18	1.31	0	1.45556	0
	164	19	1.327	0.256	1.47444	19.2916
block 5 image 13	165	1	3.73	0	4.14444	0
	166	2	2.848	0	3.16444	0
	167	3	3.837	0.448	4.26333	11.6758
	168	4	2.171	0	2.41222	0
	169	5	1.623	0	1.80333	0
	170	6	1.766	0	1.96222	0
	171	7	1.462	0	1.62444	0
block 5 image 14	172	1	1.636	0.866	1.81778	52.934
	173	2	2.459	0.411	2.73222	16.7141
	174	3	3.915	0.508	4.35	12.9757
	175	4	1.582	0.148	1.75778	9.35525
	176	5	1.808	0.385	2.00889	21.2942
	177	6	2.47	0.187	2.74444	7.57085
	178	7	1.603	0.247	1.78111	15.4086
	179	8	2.387	0	2.65222	0
	180	9	2.127	0.544	2.36333	25.5759
	181	10	1.847	0.249	2.05222	13.4813
block 5 image 15	182	1	2.568	0.256	2.85333	9.96885
	183	2	1.745	0.272	1.93889	15.5874
	184	3	1.188	0.208	1.32	17.5084
	185	4	3.703	1.428	4.11444	38.5633
	186	5	2.184	0.153	2.42667	7.00549
	187	6	1.765	0.515	1.96111	29.1785
	188	7	1.225	0	1.36111	0
	189	8	3.316	0.738	3.68444	22.2557
	190	9	2.462	0.716	2.73556	29.082
	191	10	0.883	0	0.981111	0
	192	11	1.802	0.606	2.00222	33.6293
	193	12	1.71	0.95	1.9	55.5556
	194	13	1.849	0	2.05444	0
	195	14	1.338	0	1.48667	0
	196	15	1.567	0.188	1.74111	11.9974
	197	16	2.053	0.153	2.28111	7.45251
	198	17	1.919	0.122	2.13222	6.35748
	199	18	1.44	0	1.6	0
	200	19	1.56	0.233	1.73333	14.9359
	201	20	1.822	0.454	2.02444	24.9177
	202	21	1.291	0	1.43444	0
	203	22	1.302	0.159	1.44667	12.212
		XBAR	2.00605	0.225207	2.22895	10.9193
		SIGMA	0.856173	0.304498	0.951304	13.517
block 7
image file	mito	location	P(mito)	L(ER-mito)	real P(mito)	% app
block 7 image 1	1	1	2.828	0.28	3.14222	9.90099
	2	2	4.309	1.406	4.78778	32.6294
	3	3	2.24	0.755	2.48889	33.7054
	4	4	2.608	0.679	2.89778	26.0353
	5	5	1.67	0.31	1.85556	18.5629
block 7 image 10	6	1	2.825	1.313	3.13889	46.4779
	7	2	2.669	0.905	2.96556	33.9078
	8	3	2.117	0.381	2.35222	17.9972
	9	4	1.787	0.827	1.98556	46.2787
	10	5	2.356	0.966	2.61778	41.0017
	11	6	2.686	0.82	2.98444	30.5287
	12	7	2.699	0.863	2.99889	31.9748
	13	8	3.677	1.282	4.08556	34.8654
block 7 image 11	14	1	4.804	1.779	5.33778	37.0316
	15	2	1.795	0.688	1.99444	38.3287
	16	3	3.175	1.255	3.52778	39.5276
	17	4	2.325	0.216	2.58333	9.29032
	18	5	4.236	1.92	4.70667	45.3258
	19	6	2.887	0.567	3.20778	19.6398
block 7 image 12	20	1	1.457	0.374	1.61889	25.6692
	21	2	2.433	0.641	2.70333	26.3461
	22	3	2.114	0.303	2.34889	14.333
	23	4	1.875	0.286	2.08333	15.2533
	24	5	4.969	1.027	5.52111	20.6681
block 7 image 13	25	1	4.665	1.508	5.18333	32.3258
	26	2	1.185	0.083	1.31667	7.00422
	27	3	3.925	0.694	4.36111	17.6815
	28	4	1.604	0.604	1.78222	37.6559
	29	5	2.202	1.248	2.44667	56.6757
	30	6	4.233	0.858	4.70333	20.2693
block 7 image 14	31	1	1.395	0	1.55	0
	32	2	4.961	1.828	5.51222	36.8474
	33	2	2.874	1.796	3.19333	62.4913
	34	3	1.471	0.099	1.63444	6.73012
	35	4	1.854	0.591	2.06	31.877
block 7 image 15	36	1	3.08	0.897	3.42222	29.1234
	37	2	1.616	0.825	1.79556	51.052
	38	3	2.048	0.774	2.27556	37.793
	39	4	2.317	0.779	2.57444	33.6211
	40	5	2.199	0.741	2.44333	33.6971
	41	6	2.95	1.51	3.27778	51.1864
	42	7	2.493	0	2.77	0
	43	8	1.591	0.881	1.76778	55.374
	44	9	1.795	0.812	1.99444	45.2368
	45	10	0.436	0.151	0.484444	34.633
	46	11	1.1	0.187	1.22222	17
	47	12	1.238	0.098	1.37556	7.91599
block 7 image 16	48	1	2.501	0.971	2.77889	38.8245
	49	2	2.45	1.048	2.72222	42.7755
	50	3	3.093	0.806	3.43667	26.0588
block 7 image 2	51	1	2.446	0.248	2.71778	10.139
	52	2	2.957	0.134	3.28556	4.53162
	53	3	1.383	0.097	1.53667	7.01374
	54	4	3.289	0.221	3.65444	6.71937
	55	5	1.596	0	1.77333	0
	56	6	2.617	0.501	2.90778	19.1441
	57	7	1.496	0.203	1.66222	13.5695
	58	8	1.915	0.481	2.12778	25.1175
	59	9	2.009	0.141	2.23222	7.01842
	60	10	2.946	0.503	3.27333	17.074
	61	11	2.174	0.181	2.41556	8.32567
	62	12	2.065	0.329	2.29444	15.9322
	63	13	1.63	0	1.81111	0
	64	14	1.367	0	1.51889	0
	65	15	2.047	0.324	2.27444	15.828
block 7 image 3	66	1	2.632	0.328	2.92444	12.462
	67	2	1.227	0.369	1.36333	30.0733
	68	3	1.136	0.402	1.26222	35.3873
	69	4	3.108	1.005	3.45333	32.3359
	70	5	1.284	0.196	1.42667	15.2648
	71	6	3.452	0.796	3.83556	23.0591
	72	7	2.779	0.969	3.08778	34.8687
	73	8	3.017	0.584	3.35222	19.357
	74	9	2.926	0.081	3.25111	2.76828
	75	10	1.716	0.631	1.90667	36.7716
block 7 image 4	76	1	1.206	0.447	1.34	37.0647
	77	2	2.536	0.928	2.81778	36.5931
	78	3	3.202	0.349	3.55778	10.8994
	79	4	2.46	0.359	2.73333	14.5935
	80	5	3.879	0.377	4.31	9.719
	81	6	1.203	0.276	1.33667	22.9426
	82	7	1.545	0.156	1.71667	10.0971
	83	8	1.397	0	1.55222	0
	84	9	4.678	1.713	5.19778	36.6182
	85	10	4.942	0.911	5.49111	18.4338
block 7 image 5	86	1	1.722	0.273	1.91333	15.8537
	87	2	1.855	0.372	2.06111	20.0539
	88	3	2.351	1.362	2.61222	57.9328
	89	4	1.234	0.22	1.37111	17.8282
	90	5	2.156	0.191	2.39556	8.859
	91	6	2.332	0.698	2.59111	29.9314
	92	7	1.575	0.312	1.75	19.8095
block 7 image 6	93	1	3.172	0.546	3.52444	17.2131
	94	2	1.693	0.665	1.88111	39.2794
	95	3	0.894	0.278	0.993333	31.0962
	96	4	4.595	1.125	5.10556	24.4831
	97	5	3.184	0.822	3.53778	25.8166
	98	6	3.434	0.175	3.81556	5.0961
block 7 image 8	99	1	1.027	0.124	1.14111	12.074
	100	2	2.564	0.933	2.84889	36.3885
	101	3	5.021	1.435	5.57889	28.58
	102	4	3.047	1.425	3.38556	46.7673
block 7 image 9	103	1	4.089	1.574	4.54333	38.4935
	104	2	2.868	1.064	3.18667	37.099
	105	3	2.8	0.388	3.11111	13.8571
	106	4	3.173	0.411	3.52556	12.953
	107	5	1.123	0.177	1.24778	15.7614
	108	6	1.373	0.203	1.52556	14.7851
	109	7	1.621	0.965	1.80111	59.5312
	110	8	3.026	1.005	3.36222	33.2122
block 7 image 7	111	1	2.975	0.532	3.30556	17.8824
	112	2	1.778	0.269	1.97556	15.1294
	113	3	1.776	0.471	1.97333	26.5203
	114	4	1.297	0.243	1.44111	18.7355
	115	5	1.93	0.127	2.14444	6.58031
	116	6	3.832	1.556	4.25778	40.6054
	117	7	1.793	0.988	1.99222	55.1032
	118	8	2.975	2.339	3.30556	78.6218
	119	9	1.036	0.405	1.15111	39.0927
	120	10	2.538	0.53	2.82	20.8826
		XBAR	2.44948	0.650625	2.72165	25.673
		SIGMA	1.02855	0.49824	1.14284	15.6467
block 8
image file	mito	location	P(mito)	L(ER-mito)	real P(mito)	% app
block 8 image 1	1	1	4.41	0.727	4.9	16.4853
	2	2	2.463	0.355	2.73667	14.4133
	3	3	3.439	0.526	3.82111	15.2951
	4	4	1.579	0.252	1.75444	15.9595
	5	5	2.877	0	3.19667	0
	6	6	1.957	0.536	2.17444	27.3889
	7	7	2.236	0.581	2.48444	25.9839
	8	8	1.196	0.28	1.32889	23.4114
	9	9	2.267	0	2.51889	0
	10	10	3.82	0.62	4.24444	16.2304
	11	11	2.403	0.151	2.67	6.28381
	12	12	2.407	0.333	2.67444	13.8346
block 8 image 2	13	1	2.336	0.207	2.59556	8.8613
	14	2	1.207	0.595	1.34111	49.2958
	15	3	2.098	0.602	2.33111	28.694
	16	4	1.952	0.835	2.16889	42.7766
	17	5	2.029	0.268	2.25444	13.2085
	18	6	2.149	0.361	2.38778	16.7985
	19	7	1.306	0.328	1.45111	25.1149
	20	8	0.956	0.083	1.06222	8.68201
	21	9	1.428	0.207	1.58667	14.4958
	22	10	1.604	0.563	1.78222	35.0998
	23	11	1.83	0.558	2.03333	30.4918
	24	12	1.874	0.507	2.08222	27.0544
	25	13	2.373	0.489	2.63667	20.6068
	26	14	1.851	0.837	2.05667	45.2188
	27	15	1.379	0.284	1.53222	20.5946
	28	16	1.423	0.259	1.58111	18.201
	29	17	1.553	0.624	1.72556	40.1803
block 8 image 3	30	1	1.286	0.729	1.42889	56.6874
	31	2	1.923	0	2.13667	0
	32	3	0.989	0.523	1.09889	52.8817
	33	4	1.17	0.415	1.3	35.4701
	34	5	1.489	0.871	1.65444	58.4956
	35	6	1.289	0.188	1.43222	14.5849
	36	7	1.585	0	1.76111	0
	37	8	1.095	0.252	1.21667	23.0137
	38	9	1.007	0.312	1.11889	30.9831
	39	10	1.741	0.43	1.93444	24.6984
	40	11	0.994	0.295	1.10444	29.6781
	41	12	1.172	0.118	1.30222	10.0683
	42	13	1.027	0	1.14111	0
	43	14	0.866	0	0.962222	0
block 8 image 4	44	1	1.777	0.246	1.97444	13.8436
	45	2	2.327	0.167	2.58556	7.17662
	46	3	2.105	0.093	2.33889	4.41805
	47	4	0.993	0.322	1.10333	32.427
	48	5	0.934	0.183	1.03778	19.5931
	49	6	1.384	0.446	1.53778	32.2254
	50	7	1.92	0.222	2.13333	11.5625
	51	8	1.414	0.117	1.57111	8.2744
	52	9	1.033	0.355	1.14778	34.3659
	53	10	1.147	0.61	1.27444	53.1822
	54	11	1.467	0.24	1.63	16.3599
	55	12	1.944	0.083	2.16	4.26955
	56	13	0.991	0.175	1.10111	17.6589
	57	14	1.186	0.212	1.31778	17.8752
block 8 image 5	58	1	2.069	0.69	2.29889	33.3494
	59	2	1.19	0.586	1.32222	49.2437
	60	3	1.168	0.372	1.29778	31.8493
	61	4	2.008	0.601	2.23111	29.9303
	62	5	1.458	0.307	1.62	21.0562
	63	6	1.63	0.491	1.81111	30.1227
	64	7	1.635	0.097	1.81667	5.93272
	65	8	1.637	1.111	1.81889	67.8681
	66	9	1.827	0.699	2.03	38.2594
	67	10	1.266	0.351	1.40667	27.7251
	68	11	1.05	0.078	1.16667	7.42857
	69	12	2.173	0.134	2.41444	6.16659
	70	13	2.188	0.39	2.43111	17.8245
	71	14	1.756	0.598	1.95111	34.0547
	72	15	2.038	0.356	2.26444	17.4681
block 8 image 6	73	1	2.202	0.343	2.44667	15.5767
	74	2	1.552	0.336	1.72444	21.6495
	75	3	0.952	0.42	1.05778	44.1176
	76	4	1.51	0.282	1.67778	18.6755
	77	5	1.455	0.329	1.61667	22.6117
	78	6	1.22	0.275	1.35556	22.541
	79	7	2.482	0.757	2.75778	30.4996
	80	8	1.43	0.573	1.58889	40.0699
	81	9	1.433	0.118	1.59222	8.23447
	82	10	2.114	0.266	2.34889	12.5828
	83	11	0.971	0.264	1.07889	27.1885
	84	12	3.289	0.561	3.65444	17.0569
	85	13	1.482	0.534	1.64667	36.0324
	86	14	2.575	0.835	2.86111	32.4272
	87	15	1.016	0.397	1.12889	39.0748
	88	16	1.527	0.365	1.69667	23.9031
	89	17	0.88	0.202	0.977778	22.9545
	90	18	1.803	0.657	2.00333	36.4393
	91	19	1.855	0.701	2.06111	37.7898
block 8 image 7	92	1	1.631	0.852	1.81222	52.2379
	93	2	0.733	0.486	0.814444	66.3029
	94	3	1.057	0.122	1.17444	11.5421
	95	4	1.524	0.487	1.69333	31.9554
	96	5	1.613	0.784	1.79222	48.6051
	97	6	2.151	1.144	2.39	53.1846
block 8 image 8	98	1	2.077	0.484	2.30778	23.3028
	99	2	1.88	0.642	2.08889	34.1489
	100	3	1.698	0.139	1.88667	8.1861
	101	4	1.28	0.409	1.42222	31.9531
	102	5	1.962	1.223	2.18	62.3344
	103	6	1.154	0.586	1.28222	50.7799
	104	7	0.941	0.214	1.04556	22.7418
	105	8	1.915	0.158	2.12778	8.25065
	106	9	3.244	0.818	3.60444	25.2158
	107	10	1.997	0.279	2.21889	13.971
	108	11	1.622	0.125	1.80222	7.70654
	109	12	1.797	0.373	1.99667	20.7568
	110	13	2.934	0.876	3.26	29.8569
	111	14	4.657	0.781	5.17444	16.7705
	112	15	1.473	0.199	1.63667	13.5098
	113	16	1.691	0.401	1.87889	23.7138
block 8 image 9	114	1	1.515	0.548	1.68333	36.1716
	115	2	1.332	0.251	1.48	18.8438
	116	3	0.87	0.211	0.966667	24.2529
	117	4	1.181	0.334	1.31222	28.2811
	118	5	1.571	0.467	1.74556	29.7263
	119	6	2.132	0.481	2.36889	22.561
	120	7	1.51	0.439	1.67778	29.0728
	121	8	1.676	0.39	1.86222	23.2697
	122	9	2.068	1.492	2.29778	72.147
	123	10	1.159	0.383	1.28778	33.0457
	124	11	1.342	0	1.49111	0
block 8 image 10	125	1	2.065	0.466	2.29444	22.5666
	126	2	1.795	0	1.99444	0
	127	3	3.881	0.425	4.31222	10.9508
	128	4	2.285	0.729	2.53889	31.9037
	129	5	2.488	0.575	2.76444	23.1109
	130	6	0.857	0	0.952222	0
	131	7	0.794	0.241	0.882222	30.3526
	132	8	3.604	0.502	4.00444	13.929
	133	9	1.75	0.498	1.94444	28.4571
	134	10	1.721	0.969	1.91222	56.3045
	135	11	1.567	0	1.74111	0
	136	12	2.272	0	2.52444	0
	137	13	1.542	0.282	1.71333	18.2879
	138	14	1.61	0.244	1.78889	15.1553
	139	15	1.737	0.226	1.93	13.0109
block 8 image 11	140	1	3.976	1.959	4.41778	49.2706
	141	2	1.167	0.332	1.29667	28.449
	142	3	0.936	0	1.04	0
	143	4	2.246	0.243	2.49556	10.8192
	144	5	1.98	0.459	2.2	23.1818
	145	6	1.778	0	1.97556	0
	146	7	4.586	1.13	5.09556	24.6402
	147	8	1.702	0.614	1.89111	36.0752
	148	9	1.789	0.076	1.98778	4.24818
	149	10	0.698	0.094	0.775556	13.467
	150	11	1.172	0.182	1.30222	15.529
	151	12	1.453	0.173	1.61444	11.9064
	152	13	1.336	0.435	1.48444	32.5599
	153	14	3.903	0.23	4.33667	5.8929
	154	15	1.725	0.57	1.91667	33.0435
	155	16	1.153	0.309	1.28111	26.7997
	156	17	1.896	0.583	2.10667	30.7489
	157	18	1.069	0.245	1.18778	22.9186
block 8 image 12	158	1	2.293	0.423	2.54778	18.4474
	159	2	2.196	0.275	2.44	12.5228
	160	3	1.477	0.585	1.64111	39.6073
	161	4	1.058	0.176	1.17556	16.6352
	162	5	2.353	0.714	2.61444	30.3442
	163	6	2.414	0.915	2.68222	37.9039
	164	7	1.304	0.338	1.44889	25.9202
	165	8	2.339	0.88	2.59889	37.6229
	166	9	1.424	0.274	1.58222	19.2416
block 8 image 13	167	1	1.365	0	1.51667	0
	168	2	3.689	2.007	4.09889	54.405
	169	3	1.547	0.73	1.71889	47.1881
	170	4	6.168	1.234	6.85333	20.0065
	171	5	1.181	0.288	1.31222	24.3861
	172	6	1.912	1.28	2.12444	66.9456
	173	7	1.925	0.719	2.13889	37.3506
	174	8	2.46	0.61	2.73333	24.7967
	175	9	2.507	0.635	2.78556	25.3291
block 8 image 14	176	1	2.885	0.891	3.20556	30.8839
	177	2	2.026	0.608	2.25111	30.0099
	178	3	1.317	0.387	1.46333	29.385
	179	4	1.226	0.748	1.36222	61.0114
	180	5	1.394	0.736	1.54889	52.7977
	181	6	1.61	0.352	1.78889	21.8634
	182	7	1.721	0.536	1.91222	31.1447
	183	8	1.449	0.66	1.61	45.5487
block 8 image 15	184	1	3.927	2.115	4.36333	53.8579
	185	2	2.222	0.503	2.46889	22.6373
	186	3	2.049	0.689	2.27667	33.6262
	187	4	1.408	0.358	1.56444	25.4261
	188	5	2.597	1.411	2.88556	54.3319
	189	6	3.658	0.408	4.06444	11.1536
	190	7	1.671	0.917	1.85667	54.8773
	191	8	6.601	1.169	7.33444	17.7094
	192	9	1.476	0.127	1.64	8.60434
block 8 image 16	193	1	2.155	0.322	2.39444	14.942
	194	2	1.452	1.148	1.61333	79.0634
	195	3	1.903	0.561	2.11444	29.4798
	196	4	1.569	0.237	1.74333	15.1052
	197	5	1.866	0.975	2.07333	52.2508
	198	6	0.891	0.178	0.99	19.9776
	199	7	1.456	0.754	1.61778	51.7857
	200	8	1.175	0.27	1.30556	22.9787
	201	9	1.474	0.854	1.63778	57.9376
	202	10	1.258	0.589	1.39778	46.8203
		XBAR	1.83894	0.468332	2.04327	26.1386
		SIGMA	0.86751	0.355439	0.9639	16.457

## Sheet: 1J
Numerical source data for Figure 1J
ctrl siRNA			siPINK1			ctrl siRNA + MG132			ctrl siRNA + CCCP			siPINK1 + CCCP			ctrl siRNA + MG132 + CCCP
image file	% in contact		image file	% in contact		image file	% in contact		image file	% in contact		image file	% in contact		image file	% in contact
block 1 image 1	100		block 3 image 1	92.3077		block 4 image 2	50		block 5 image 10	42.8571		block 7 image 1	100		block 8 image 1	83.3333
block 1 image 2	100		block 3 image 2	100		block 4 image 3	100		block 5 image 2	64.7059		block 7 image 10	100		block 8 image 2	100
block 1 image 3	100		block 3 image 3	84.6154		block 4 image 4	100		block 5 image 3	0		block 7 image 11	100		block 8 image 3	71.4286
block 1 image 4	100		block 3 image 4	70		block 4 image 5	100		block 5 image 4	88.8889		block 7 image 12	100		block 8 image 4	100
block 1 image 5	100		block 3 image 5	100		block 4 image 6	100		block 5 image 5	82.6087		block 7 image 13	100		block 8 image 5	100
block 1 image 6	93.3333		block 3 image 6	100		block 4 image 7	100		block 5 image 6	83.3333		block 7 image 14	75		block 8 image 6	100
block 1 image 7	100		block 3 image 7	100		block 4 image 8	100		block 5 image 7	73.3333		block 7 image 15	91.6667		block 8 image 7	100
block 1 image 8	100		block 3 image 8	100		block 4 image 9	100		block 5 image 8	45.4545		block 7 image 16	100		block 8 image 8	100
block 1 image 9	100		block 3 image 9	100		block 4 image 10	83.3333		block 5 image 9	46.1538		block 7 image 2	80		block 8 image 9	90.9091
block 1 image 10	100		block 3 image 10	57.1429		block 4 image 11	100		block 5 image 11	0		block 7 image 3	100		block 8 image 10	73.3333
block 1 image 11	100		block 3 image 11	60		block 4 image 12	100		block 5 image 12	57.8947		block 7 image 4	90		block 8 image 11	88.8889
block 1 image 12	100		block 3 image 12	66.67		block 4 image 13	92.3077		block 5 image 13	16.6667		block 7 image 5	100		block 8 image 12	100
block 1 image 13	75		block 3 image 13	100		block 4 image 14	100		block 5 image 14	90		block 7 image 6	100		block 8 image 13	88.8889
block 1 image 14	100		block 3 image 14	100		block 4 image 15	91.6667		block 5 image 15	72.7273		block 7 image 7	100		block 8 image 14	100
block 1 image 15	100		block 3 image 15	100								block 7 image 8	100		block 8 image 15	100
			block 3 image 16	100								block 7 image 9	100		block 8 image 16	100
XBAR	97.8889		XBAR	89.421		XBAR	94.0934		XBAR	54.616		XBAR	96.0417		XBAR	93.5489
SIGMA	6.56067		SIGMA	16.2334		SIGMA	13.6381		SIGMA	31.0405		SIGMA	7.932		SIGMA	9.8958

## Sheet: 1N
Numerical source data for Figure 1N
											500 nm = 0.719
block 1
image file	mito	location	P(mito)	L(ER-mito)	% app	contact?	% contact	real P(mito)	real L(ER-mito)		block 1	ctrl 1
block 1 image 3	1	1	1.21	0.69	57.0248	1	1	0.841446	0.479833		block 2	ctrl 1 + CCCP
	2	2	1.991	0.863	43.3451	1		1.38456	0.600139		block 5	ctrl 2
	3	3	1.688	0.144	8.53081	1		1.17385	0.100139		block 6	ctrl 2 + CCCP
	4	4	2.768	0.837	30.2384	1		1.9249	0.582058		block 7	parkin
	5	5	1.479	0.449	30.3584	1		1.02851	0.312239		block 8	parkin + CCCP
	6	6	3.512	1.163	33.115	1		2.44228	0.808762
block 1 image 4	7	1	7.772	2.888	37.159	1	1	5.40473	2.00834
	8	2	1.599	0.399	24.9531	1		1.11196	0.277469
	9	3	2.059	0.883	42.8849	1		1.43185	0.614047
	10	4	1.526	0.655	42.9227	1		1.0612	0.455494
	11	5	0.982	0.478	48.6762	1		0.682893	0.332406
	12	6	2.699	0.629	23.3049	1		1.87691	0.437413
	13	7	2.98	1.023	34.3289	1		2.07232	0.711405
	14	8	1.154	0.576	49.9133	1		0.802503	0.400556
	15	9	2.465	0.287	11.643	1		1.71419	0.199583
	16	10	2.283	0.934	40.9111	1		1.58762	0.649513
	17	11	1.984	0.304	15.3226	1		1.37969	0.211405
	18	12	2.437	1.003	41.1572	1		1.69471	0.697497
	19	13	5.433	0.66	12.148	1		3.77816	0.458971
block 1 image 5	20	1	1.479	0.165	11.1562	1	1	1.02851	0.114743
	21	2	2.55	1.368	53.6471	1		1.7733	0.951321
	22	3	1.996	0.2	10.02	1		1.38804	0.139082
	23	4	1.966	0.989	50.3052	1		1.36718	0.687761
	24	5	3.221	0.722	22.4154	1		2.23992	0.502086
block 1 image 6	25	1	2.38	1.189	49.958	1	1	1.65508	0.826843
	26	2	1.49	0.27	18.1208	1		1.03616	0.187761
	27	3	1.932	0.489	25.3106	1		1.34353	0.340056
	28	4	1.727	1.005	58.1934	1		1.20097	0.698887
block 1 image 7	29	1	0.793	0.482	60.7818	1	1	0.55146	0.335188
	30	2	0.673	0.322	47.8455	1		0.468011	0.223922
	31	3	3.625	1.556	42.9241	1		2.52086	1.08206
	32	4	1.539	0.432	28.0702	1		1.07024	0.300417
	33	5	2.609	0.604	23.1506	1		1.81433	0.420028
	34	6	3.038	0.696	22.9098	1		2.11266	0.484006
block 1 image 8	35	1	2.501	0.543	21.7113	1	1	1.73922	0.377608
	36	2	4.747	1.25	26.3324	1		3.30111	0.869263
	37	3	0.781	0.247	31.6261	1		0.543115	0.171766
	38	4	1.988	0.34	17.1026	1		1.38248	0.236439
	39	5	1.721	0.443	25.7408	1		1.1968	0.308067
	40	6	1.186	0.827	69.7302	1		0.824757	0.575104
block 1 image 9	41	1	2.281	0.608	26.655	1	1	1.58623	0.422809
	42	2	1.848	0.712	38.5281	1		1.28512	0.495132
	43	3	2.558	0.394	15.4027	1		1.77886	0.273992
	44	4	1.915	0.581	30.3394	1		1.33171	0.404033
	45	5	4.154	2.158	51.9499	1		2.88873	1.5007
	46	6	1.22	0.81	66.3934	1		0.848401	0.563282
	47	7	1.87	0.25	13.369	1		1.30042	0.173853
	48	8	4.142	1.551	37.4457	1		2.88039	1.07858
	49	9	1.515	0.132	8.71287	1		1.05355	0.0917942
block 1 image 10	50	1	1.118	0.344	30.7692	1	1	0.777469	0.239221
	51	2	6.359	0.584	9.18383	1		4.42211	0.40612
	52	3	1.691	0.201	11.8865	1		1.17594	0.139777
	53	4	1.1	0.842	76.5455	1		0.764951	0.585535
	54	5	2.077	0.205	9.87	1		1.44437	0.142559
	55	6	2.527	0.129	5.10487	1		1.7573	0.0897079
	56	7	1.322	0.524	39.6369	1		0.919332	0.364395
	57	8	3.095	0.985	31.8255	1		2.15229	0.684979
block 1 image 11	58	1	2.945	1.45	49.236	1	1	2.04798	1.00834
	59	2	3.203	0.831	25.9444	1		2.2274	0.577886
	60	3	1.189	0.18	15.1388	1		0.826843	0.125174
	61	4	4.294	1.339	31.183	1		2.98609	0.931154
	62	5	1.833	1.173	63.9935	1		1.27469	0.815716
block 1 image 12	63	1	3.257	0.785	24.1019	1	0.8	2.26495	0.545897
	64	2	3.129	1.119	35.7622	1		2.17594	0.778164
	65	3	2.131	0.748	35.1009	1		1.48192	0.520167
	66	4	2.546	0.164	6.44148	1		1.77051	0.114047
	67	5	1.516	0	0	0		1.05424	0
block 1 image 13	68	1	2.759	0.457	16.564	1	1	1.91864	0.317803
	69	2	4.01	0.202	5.03741	1		2.7886	0.140473
	70	3	2.305	0.23	9.97831	1		1.60292	0.159944
	71	4	8.579	2.081	24.2569	1		5.96592	1.44715
	72	5	4.152	1.979	47.6638	1		2.88734	1.37622
	73	6	4.696	1.685	35.8816	1		3.26565	1.17177
block 1 image 14	74	1	1.592	0.717	45.0377	1	0.888889	1.10709	0.498609
	75	2	1.44	0.282	19.5833	1		1.00139	0.196106
	76	3	1.344	0	0	0		0.934631	0
	77	4	1.764	0.793	44.9546	1		1.2267	0.55146
	78	5	2.546	0.764	30.0079	1		1.77051	0.531293
	79	6	2.388	1.08	45.2261	1		1.66064	0.751043
	80	7	1.484	0.35	23.5849	1		1.03199	0.243394
	81	8	2.736	0.661	24.1594	1		1.90264	0.459666
	82	9	2.278	0.949	41.6594	1		1.58414	0.659944
block 1 image 15	83	1	2.253	0.493	21.8819	1	1	1.56676	0.342837
	84	2	4.154	1.452	34.9543	1		2.88873	1.00974
block 1 image 16	85	1	2.373	0.195	8.21745	1	1	1.65021	0.135605
	86	2	4.934	0.409	8.28942	1		3.43115	0.284423
block 1 image 17	87	1	2.03	0.551	27.1429	1	0.875	1.41168	0.383171
	88	2	1.955	0.631	32.2762	1		1.35953	0.438804
	89	3	2.683	1.389	51.7704	1		1.86579	0.965925
	90	4	1.896	0.696	36.7089	1		1.3185	0.484006
	91	5	1.632	0.112	6.86275	1		1.13491	0.077886
	92	6	1.958	0	0	0		1.36161	0
	93	7	2.618	0.538	20.55	1		1.82058	0.374131
	94	8	2.188	0.307	14.0311	1		1.52156	0.213491
block 1 image 18	95	1	2.685	1.085	40.4097	1	1	1.86718	0.75452
	96	2	4.243	0.698	16.4506	1		2.95063	0.485396
		XBAR	2.50493	0.714469	29.8818		0.972743	1.74195	0.496849
		SIGMA	1.35984	0.515606	17.0478		0.0611466	0.945649	0.358558
block 2
image file	mito	location	P(mito)	L(ER-mito)	% app	contact?	% contact	real P(mito)	real L(ER-mito)
block 2 image 1	1	1	2.559	0.529	20.6721	1	1	1.77955	0.367872
	2	2	3.72	0.23	6.1828	1		2.58693	0.159944
	3	3	2.164	0.66	30.4991	1		1.50487	0.458971
	4	4	1.981	0.475	23.9778	1		1.37761	0.33032
	5	5	1.567	0.454	28.9726	1		1.08971	0.315716
	6	6	1.403	0.349	24.8753	1		0.975661	0.242698
	7	7	2.182	0.471	21.5857	1		1.51739	0.327538
	8	8	2.179	0.525	24.0936	1		1.5153	0.36509
block 2 image 10	9	1	3.103	0.153	4.93071	1	0.833333	2.15786	0.106398
	10	2	1.951	0.2	10.2512	1		1.35675	0.139082
	11	3	2.821	1.585	56.1857	1		1.96175	1.10223
	12	4	2.103	0	0	0		1.46245	0
	13	5	2.067	0.195	9.43396	1		1.43741	0.135605
	14	6	3.738	0.703	18.8068	1		2.59944	0.488873
	15	7	1.77	0	0	0		1.23088	0
	16	8	2.253	0.189	8.38881	1		1.56676	0.131433
	17	9	2.636	0.536	20.3338	1		1.8331	0.37274
	18	10	2.104	0.561	26.6635	1		1.46314	0.390125
	19	11	2.41	0.52	21.5768	1		1.67594	0.361613
	20	12	1.222	0.173	14.1571	1		0.849791	0.120306
block 2 image 2	21	1	2.441	0.61	24.9898	1	0.857143	1.6975	0.4242
	22	2	1.463	0.348	23.7867	1		1.01739	0.242003
	23	3	1.776	0.224	12.6126	1		1.23505	0.155772
	24	4	2.667	0.636	23.847	1		1.85466	0.442281
	25	5	3.217	0.412	12.807	1		2.23713	0.286509
	26	6	1.999	0	0	0		1.39013	0
	27	7	1.426	0.175	12.2721	1		0.991655	0.121697
block 2 image 3	28	1	1.365	0.284	20.8059	1	1	0.949235	0.197497
	29	2	5.088	0.56	11.0063	1		3.53825	0.38943
	30	3	1.952	0.293	15.0102	1		1.35744	0.203755
	31	4	6.071	1.118	18.4154	1		4.22184	0.777469
	32	5	3.655	0.549	15.0205	1		2.54172	0.38178
	33	6	1.813	0.513	28.2956	1		1.26078	0.356745
	34	7	4.083	0.897	21.9691	1		2.83936	0.623783
	35	8	1.606	0.327	20.3611	1		1.11683	0.227399
	36	9	1.758	0.471	26.7918	1		1.22253	0.327538
block 2 image 4	37	1	2.002	0.209	10.4396	1	1	1.39221	0.145341
	38	2	1.229	0.212	17.2498	1		0.854659	0.147427
	39	3	9.789	1.477	15.0884	1		6.80737	1.02712
	40	4	4.649	0.561	12.0671	1		3.23296	0.390125
	41	5	4.438	0.417	9.39612	1		3.08623	0.289986
	42	6	1.8	0.27	15	1		1.25174	0.187761
	43	7	1.892	0.255	13.4778	1		1.31572	0.17733
block 2 image 5	44	1	4.825	1.461	30.2798	1	1	3.35535	1.01599
	45	2	1.596	0.404	25.3133	1		1.10987	0.280946
	46	3	2.35	0.375	15.9574	1		1.63421	0.260779
	47	4	1.629	0.212	13.0141	1		1.13282	0.147427
	48	5	5.148	0.933	18.1235	1		3.57997	0.648818
block 2 image 6	49	1	1.807	0.544	30.1051	1	0.666667	1.25661	0.378303
	50	2	2.091	0.098	4.68675	1		1.4541	0.0681502
	51	3	1.409	0	0	0		0.979833	0
block 2 image 7	52	1	3.052	0.432	14.1547	1	1	2.12239	0.300417
	53	2	1.35	0.348	25.7778	1		0.938804	0.242003
	54	3	2.688	0.771	28.683	1		1.86926	0.536161
	55	4	1.308	0.166	12.6911	1		0.909597	0.115438
	56	5	1.764	0.103	5.839	1		1.2267	0.0716273
block 2 image 8	57	1	2.568	0.139	5.41277	1	1	1.78581	0.096662
	58	2	2.266	0.117	5.16328	1		1.5758	0.081363
	59	3	2.156	0.333	15.4453	1		1.4993	0.231572
	60	4	2.006	0.324	16.1515	1		1.39499	0.225313
	61	5	4.291	0.283	6.5952	1		2.98401	0.196801
block 2 image 9	62	1	2.945	0.477	16.1969	1	0.875	2.04798	0.331711
	63	2	3.713	0.345	9.29168	1		2.58206	0.239917
	64	3	3.228	0.317	9.82032	1		2.24478	0.220445
	65	4	2.189	0.183	8.35998	1		1.52225	0.12726
	66	5	5.259	0.443	8.42365	1		3.65716	0.308067
	67	6	4.878	1.172	24.0262	1		3.39221	0.815021
	68	7	4.193	1.192	28.4283	1		2.91586	0.828929
	69	8	2.429	0	0	0		1.68915	0
block 2 image 11	70	1	2.981	0	0	0	0.636364	2.07302	0
	71	2	2.876	0	0	0		2	0
	72	3	2.104	0	0	0		1.46314	0
	73	4	2.593	0.468	18.0486	1		1.8032	0.325452
	74	5	1.922	0.422	21.9563	1		1.33658	0.293463
	75	6	2.347	0.448	19.0882	1		1.63213	0.311544
	76	7	1.919	0	0	0		1.33449	0
	77	8	3.255	0.405	12.4424	1		2.26356	0.281641
	78	9	2.003	0.274	13.6795	1		1.39291	0.190542
	79	10	2.714	0.228	8.40088	1		1.88734	0.158554
	80	11	2.463	0.278	11.287	1		1.7128	0.193324
block 2 image 12	81	1	2.742	0.585	21.3348	1	1	1.90682	0.406815
	82	2	2.144	0.75	34.9813	1		1.49096	0.521558
	83	3	2.746	0.207	7.53824	1		1.9096	0.14395
block 2 image 13	84	1	3.202	0.245	7.65147	1	1	2.2267	0.170376
	85	2	2.255	0.957	42.439	1		1.56815	0.665508
	86	3	2.361	0.397	16.8149	1		1.64186	0.276078
	87	4	4.883	1.455	29.7973	1		3.39569	1.01182
	88	5	2.255	0.389	17.2506	1		1.56815	0.270515
	89	6	1.99	0.79	39.6985	1		1.38387	0.549374
block 2 image 14	90	1	2.631	1.112	42.2653	1	1	1.82962	0.773296
	91	2	3.349	0.604	18.0352	1		2.32893	0.420028
	92	3	3.299	0.915	27.7357	1		2.29416	0.6363
	93	4	2.587	0.804	31.0785	1		1.79903	0.55911
	94	5	2.826	0.248	8.77565	1		1.96523	0.172462
	95	6	2.283	0.157	6.87692	1		1.58762	0.109179
	96	7	2.74	0.169	6.16788	1		1.90542	0.117524
	97	8	1.927	0.186	9.65231	1		1.34006	0.129346
	98	9	2.057	0.257	12.4939	1		1.43046	0.17872
block 2 image 15	99	1	2.694	0.443	16.4439	1	1	1.87344	0.308067
	100	2	2.601	0.173	6.65129	1		1.80876	0.120306
	101	3	2.894	0.216	7.46372	1		2.01252	0.150209
	102	4	2.329	0.484	20.7815	1		1.61961	0.336579
	103	5	1.316	0.122	9.27052	1		0.91516	0.0848401
	104	6	3.117	0.744	23.8691	1		2.16759	0.517385
	105	7	1.564	0.161	10.2941	1		1.08762	0.111961
	106	8	3.035	0.118	3.88797	1		2.11057	0.0820584
	107	9	1.551	0.228	14.7002	1		1.07858	0.158554
block 2 image 16	108	1	3.254	0.657	20.1905	1	1	2.26287	0.456885
	109	2	3.975	0.84	21.1321	1		2.76426	0.584145
	110	3	3.242	1.169	36.058	1		2.25452	0.812935
	111	4	2.302	0.484	21.0252	1		1.60083	0.336579
	112	5	2.939	0.113	3.84485	1		2.04381	0.0785814
	113	6	2.476	1.042	42.084	1		1.72184	0.724618
	114	7	2.191	0.125	5.70516	1		1.52364	0.0869263
	115	8	1.918	0.206	10.7404	1		1.3338	0.143255
		XBAR	2.66176	0.439765	16.4337		0.929282	1.85101	0.305817
		SIGMA	1.18947	0.347924	10.6381		0.123054	0.827169	0.24195
block 5
image file	mito	location	P(mito)	L(ER-mito)	% app	contact?	% contact	real P(mito)	real L(ER-mito)
block 5 image 1	1	1	2.215	0.59	26.6366	1	1	1.54033	0.410292
	2	2	3.977	0.449	11.2899	1		2.76565	0.312239
	3	3	1.538	0.148	9.62289	1		1.06954	0.102921
	4	4	1.612	0.321	19.9132	1		1.121	0.223227
	5	5	1.85	0.36	19.4595	1		1.28651	0.250348
	6	6	2.072	0.711	34.3147	1		1.44089	0.494437
	7	7	2.325	0.632	27.1828	1		1.61683	0.439499
	8	8	4.204	1.568	37.2978	1		2.9235	1.0904
block 5 image 2	9	1	1.911	0.188	9.83778	1	1	1.32893	0.130737
	10	2	2.401	0.937	39.0254	1		1.66968	0.651599
	11	3	4.858	0.706	14.5327	1		3.3783	0.49096
	12	4	3.069	0.673	21.929	1		2.13421	0.468011
	13	5	1.826	0.274	15.0055	1		1.26982	0.190542
	14	6	3.06	0.628	20.5229	1		2.12796	0.436718
	15	7	2.917	0.824	28.2482	1		2.02851	0.573018
	16	8	2.873	0.529	18.4128	1		1.99791	0.367872
	17	9	1.995	0.588	29.4737	1		1.38734	0.408901
block 5 image 3	18	1	4.035	1.126	27.9058	1	0.818182	2.80598	0.783032
	19	2	1.738	0.183	10.5293	1		1.20862	0.12726
	20	3	1.573	0.399	25.3655	1		1.09388	0.277469
	21	4	1.287	0.209	16.2393	1		0.894993	0.145341
	22	5	3.814	0	0	0		2.65229	0
	23	6	1.311	0	0	0		0.911683	0
	24	7	1.407	0.122	8.67093	1		0.978442	0.0848401
	25	8	2.584	0.678	26.2384	1		1.79694	0.471488
	26	9	1.326	0.266	20.0603	1		0.922114	0.184979
	27	10	1.56	0.22	14.1026	1		1.08484	0.15299
	28	11	1.264	0.294	23.2595	1		0.878999	0.204451
block 5 image 4	29	1	2.772	0.639	23.0519	1	1	1.92768	0.444367
	30	2	3.625	0.39	10.7586	1		2.52086	0.27121
	31	3	5.747	0.978	17.0176	1		3.99652	0.680111
	32	4	9.671	0.962	9.94727	1		6.72531	0.668985
	33	5	8.692	0.827	9.5145	1		6.04451	0.575104
block 5 image 5	34	1	3.727	0.997	26.7507	1	1	2.59179	0.693324
	35	2	5.181	2.026	39.1044	1		3.60292	1.4089
	36	3	1.893	0.62	32.7522	1		1.31641	0.431154
	37	4	3.324	0.4	12.0337	1		2.31154	0.278164
	38	5	1.227	0.476	38.7938	1		0.853268	0.331015
	39	6	5.939	3.015	50.7661	1		4.13004	2.09666
	40	7	2.257	0.909	40.2747	1		1.56954	0.632128
block 5 image 6	41	1	2.265	0.398	17.5717	1	1	1.5751	0.276773
	42	2	1.331	0.482	36.2134	1		0.925591	0.335188
	43	3	1.788	0.612	34.2282	1		1.24339	0.425591
	44	4	2.287	1.115	48.7538	1		1.5904	0.775382
	45	5	2.239	0.989	44.1715	1		1.55702	0.687761
	46	6	1.399	0.406	29.0207	1		0.972879	0.282337
	47	7	3.153	1.614	51.1893	1		2.19263	1.12239
block 5 image 7	48	1	5.894	0.755	12.8096	1	1	4.09875	0.525035
	49	2	3.405	1.054	30.9545	1		2.36787	0.732962
	50	3	7.977	1.954	24.4954	1		5.54729	1.35883
block 5 image 8	51	1	4.613	1.913	41.4698	1	1	3.20793	1.33032
	52	2	2.866	0.238	8.30426	1		1.99305	0.165508
block 5 image 9	53	1	1.689	0.903	53.4636	1	1	1.17455	0.627955
	54	2	2.426	1.384	57.0486	1		1.68707	0.962448
	55	3	4.464	0.604	13.5305	1		3.10431	0.420028
	56	4	5.043	1.035	20.5235	1		3.50695	0.71975
	57	5	1.376	0.347	25.218	1		0.956885	0.241307
	58	6	4.483	1.615	36.025	1		3.11752	1.12309
	59	7	2.52	1.12	44.4444	1		1.75243	0.77886
block 5 image 10	60	1	3.164	1.244	39.3173	1	0.888889	2.20028	0.86509
	61	2	3.576	0.5	13.9821	1		2.48679	0.347705
	62	3	2.143	0	0	0		1.49026	0
	63	4	2.906	0.934	32.1404	1		2.02086	0.649513
	64	5	4.223	0.61	14.4447	1		2.93672	0.4242
	65	6	5.551	2.219	39.9748	1		3.86022	1.54312
	66	7	2.635	0.496	18.8235	1		1.83241	0.344924
	67	8	1.934	0.725	37.4871	1		1.34492	0.504172
	68	9	3.209	1.224	38.1427	1		2.23157	0.851182
block 5 image 11	69	1	5.552	2.853	51.3869	1	1	3.86092	1.98401
	70	2	4.142	1.335	32.2308	1		2.88039	0.928373
	71	3	5.121	0.806	15.7391	1		3.5612	0.560501
	72	4	2.2	1.246	56.6364	1		1.5299	0.866481
block 5 image 12	73	1	1.461	0.71	48.5969	1	1	1.01599	0.493741
	74	2	1.251	0.731	58.4333	1		0.869958	0.508345
	75	3	1.463	0.468	31.9891	1		1.01739	0.325452
	76	4	2.2	0.634	28.8182	1		1.5299	0.44089
	77	5	1.587	0.84	52.9301	1		1.10362	0.584145
	78	6	1.639	0.896	54.6675	1		1.13978	0.623088
	79	7	1.075	0.865	80.4651	1		0.747566	0.60153
	80	8	1.482	1.244	83.9406	1		1.0306	0.86509
	81	9	1.02	0.938	91.9608	1		0.709318	0.652295
	82	10	1.44	0.304	21.1111	1		1.00139	0.211405
	83	11	1.973	0.456	23.112	1		1.37204	0.317107
	84	12	5.255	1.358	25.8421	1		3.65438	0.944367
	85	13	1.61	1.062	65.9627	1		1.11961	0.738526
	86	14	0.704	0.31	44.0341	1		0.489569	0.215577
	87	15	1.087	0.682	62.7415	1		0.755911	0.47427
block 5 image 13	88	1	1.788	0.448	25.0559	1	1	1.24339	0.311544
	89	2	3.51	1.985	56.5527	1		2.44089	1.38039
	90	3	2.144	0.675	31.4832	1		1.49096	0.469402
	91	4	1.58	0.441	27.9114	1		1.09875	0.306676
	92	5	1.897	0.504	26.5683	1		1.31919	0.350487
	93	6	3.991	1.095	27.4367	1		2.77538	0.761474
	94	7	2.109	0.556	26.3632	1		1.46662	0.386648
	95	8	1.345	0.393	29.2193	1		0.935327	0.273296
block 5 image 14	96	1	1.579	0.312	19.7593	1	1	1.09805	0.216968
	97	2	4.95	1.141	23.0505	1		3.44228	0.793463
	98	3	1.475	0.739	50.1017	1		1.02573	0.513908
	99	4	3.081	1.135	36.8387	1		2.14256	0.789291
	100	5	4.187	1.622	38.739	1		2.91168	1.12796
	101	6	1.195	0.226	18.9121	1		0.831015	0.157163
	102	7	2.43	1.798	73.9918	1		1.68985	1.25035
	103	8	1.747	0.687	39.3246	1		1.21488	0.477747
block 5 image 15	104	1	5.062	2.332	46.0687	1	1	3.52017	1.6217
	105	2	2.326	0.427	18.3577	1		1.61752	0.29694
		XBAR	2.85594	0.824819	31.1993		0.980471	1.98605	0.573588
		SIGMA	1.67858	0.580749	17.9257		0.05324	1.1673	0.403859
block 6
image file	mito	location	P(mito)	L(ER-mito)	% app	contact?	% contact	real P(mito)	real L(ER-mito)
block 6 image 1	1	1	2.614	1.087	41.5838	1	1	1.8178	0.755911
	2	2	3.289	0.831	25.266	1		2.2872	0.577886
block 6 image 2	3	1	3.405	0.941	27.6358	1	1	2.36787	0.654381
	4	2	2.52	0.188	7.46032	1		1.75243	0.130737
	5	3	2.269	0.171	7.53636	1		1.57789	0.118915
	6	4	3.132	1.126	35.9515	1		2.17803	0.783032
block 6 image 3	7	1	1.475	0	0	0	0.9	1.02573	0
	8	2	1.364	0.297	21.7742	1		0.94854	0.206537
	9	3	1.697	0.167	9.8409	1		1.18011	0.116134
	10	4	1.689	0.468	27.7087	1		1.17455	0.325452
	11	5	1.183	0.118	9.97464	1		0.82267	0.0820584
	12	6	2.426	0.363	14.9629	1		1.68707	0.252434
	13	7	1.738	0.754	43.3832	1		1.20862	0.524339
	14	8	2.082	0.314	15.0817	1		1.44784	0.218359
	15	9	2.2	0.189	8.59091	1		1.5299	0.131433
	16	10	3.576	0.191	5.34116	1		2.48679	0.132823
block 6 image 4	17	1	5.063	0.983	19.4154	1	0.9	3.52086	0.683588
	18	2	2.051	0.222	10.824	1		1.42629	0.154381
	19	3	3.773	0.998	26.4511	1		2.62378	0.694019
	20	4	2.398	0.754	31.4429	1		1.66759	0.524339
	21	5	2.509	0.064	2.55082	1		1.74478	0.0445063
	22	6	1.876	0	0	0		1.30459	0
	23	7	2.877	0.2	6.95169	1		2.0007	0.139082
	24	8	5.001	0.09	1.79964	1		3.47775	0.0625869
	25	9	2.053	0.238	11.5928	1		1.42768	0.165508
	26	10	1.775	0.395	22.2535	1		1.23435	0.274687
block 6 image 5	27	1	3.822	0.69	18.0534	1	1	2.65786	0.479833
	28	2	2.175	0.572	26.2989	1		1.51252	0.397775
	29	3	1.326	0.24	18.0995	1		0.922114	0.166898
	30	4	3.335	0.669	20.06	1		2.31919	0.465229
	31	5	1.661	0.084	5.05719	1		1.15508	0.0584145
	32	6	3.353	1.234	36.8029	1		2.33171	0.858136
	33	7	2.313	0.393	16.9909	1		1.60848	0.273296
	34	8	1.893	0.31	16.3761	1		1.31641	0.215577
	35	9	1.194	0.143	11.9765	1		0.83032	0.0994437
block 6 image 6	36	1	1.456	0	0	0	0.875	1.01252	0
	37	2	1.376	0.142	10.3198	1		0.956885	0.0987483
	38	3	2.939	0.745	25.3488	1		2.04381	0.518081
	39	4	1.529	0.375	24.5258	1		1.06328	0.260779
	40	5	2.447	0.167	6.82468	1		1.70167	0.116134
	41	6	1.79	0.488	27.2626	1		1.24478	0.33936
	42	7	3.021	0.451	14.9288	1		2.10083	0.31363
	43	8	1.156	0.104	8.99654	1		0.803894	0.0723227
block 6 image 7	44	1	4.562	0.129	2.82771	1	0.6	3.17246	0.0897079
	45	2	4.103	0.805	19.6198	1		2.85327	0.559805
	46	3	2.956	0.161	5.44655	1		2.05563	0.111961
	47	4	3.177	0	0	0		2.20932	0
	48	5	3.111	0	0	0		2.16342	0
block 6 image 8	49	1	3.724	0.632	16.971	1	0.733333	2.58971	0.439499
	50	2	3.008	0.314	10.4388	1		2.09179	0.218359
	51	3	1.961	0	0	0		1.3637	0
	52	4	1.825	0	0	0		1.26912	0
	53	5	4.285	0.982	22.9172	1		2.97983	0.682893
	54	6	2.047	0	0	0		1.4235	0
	55	7	1.31	0.163	12.4427	1		0.910987	0.113352
	56	8	4.714	0.509	10.7976	1		3.27816	0.353964
	57	9	1.504	0.267	17.7527	1		1.0459	0.185675
	58	10	1.454	0.068	4.67675	1		1.01113	0.0472879
	59	11	2.399	1.008	42.0175	1		1.66829	0.700974
	60	12	3.239	0.432	13.3374	1		2.25243	0.300417
	61	13	1.717	0	0	0		1.19402	0
	62	14	2.003	0.127	6.34049	1		1.39291	0.0883171
	63	15	3.543	0.32	9.03189	1		2.46384	0.222531
block 6 image 9	64	1	1.899	0.202	10.6372	1	0.833333	1.32058	0.140473
	65	2	5.857	0.462	7.888	1		4.07302	0.32128
	66	3	2.521	0.264	10.472	1		1.75313	0.183588
	67	4	1.935	0.505	26.0982	1		1.34562	0.351182
	68	5	1.686	0	0	0		1.17246	0
	69	6	5.365	0.371	6.91519	1		3.73088	0.257997
block 6 image 10	70	1	4.532	0.572	12.6214	1	0.909091	3.1516	0.397775
	71	2	1.513	0.554	36.616	1		1.05216	0.385257
	72	3	1.765	0.166	9.4051	1		1.2274	0.115438
	73	4	2.562	0	0	0		1.78164	0
	74	5	2.228	0.357	16.0233	1		1.54937	0.248261
	75	6	2.029	0.272	13.4056	1		1.41099	0.189152
	76	7	1.833	0.358	19.5308	1		1.27469	0.248957
	77	8	4.393	0.703	16.0027	1		3.05494	0.488873
	78	9	1.956	0.207	10.5828	1		1.36022	0.14395
	79	10	2.13	0.102	4.78873	1		1.48122	0.0709318
	80	11	1.752	0.113	6.44977	1		1.21836	0.0785814
block 6 image 11	81	1	1.799	0.291	16.1757	1	1	1.25104	0.202364
	82	2	1.461	0.235	16.0849	1		1.01599	0.163421
	83	3	1.83	0.368	20.1093	1		1.2726	0.255911
	84	4	2.147	0.113	5.26316	1		1.49305	0.0785814
	85	5	4.586	0.381	8.30789	1		3.18915	0.264951
	86	6	4.473	0.518	11.5806	1		3.11057	0.360223
	87	7	1.729	0.199	11.5095	1		1.20236	0.138387
	88	8	1.657	0.257	15.51	1		1.15229	0.17872
	89	9	2.415	0.194	8.03313	1		1.67942	0.13491
	90	10	2.839	0.099	3.48714	1		1.97427	0.0688456
	91	11	4.439	0.466	10.4979	1		3.08693	0.324061
block 6 image 12	92	1	2.773	0.305	10.9989	1	0.769231	1.92837	0.2121
	93	2	2.088	0	0	0		1.45202	0
	94	3	3.368	0.437	12.9751	1		2.34214	0.303894
	95	4	2.696	0.274	10.1632	1		1.87483	0.190542
	96	5	3.011	0.965	32.0492	1		2.09388	0.671071
	97	6	1.53	0.094	6.14379	1		1.06398	0.0653686
	98	7	2.615	0.208	7.95411	1		1.8185	0.144645
	99	8	1.941	0.069	3.55487	1		1.34979	0.0479833
	100	9	2.124	0	0	0		1.47705	0
	101	10	1.613	0.144	8.92746	1		1.1217	0.100139
	102	11	2.327	0.691	29.6949	1		1.61822	0.480529
	103	12	1.899	0	0	0		1.32058	0
	104	13	4.911	1.597	32.5188	1		3.41516	1.11057
block 6 image 13	105	1	2.319	0.327	14.1009	1	1	1.61266	0.227399
	106	2	1.341	0.164	12.2297	1		0.932545	0.114047
	107	3	4.193	0.276	6.5824	1		2.91586	0.191933
	108	4	1.566	0.106	6.76884	1		1.08901	0.0737135
	109	5	1.921	0.204	10.6195	1		1.33588	0.141864
	110	6	2.037	0.173	8.49288	1		1.41655	0.120306
	111	7	2.37	0.438	18.481	1		1.64812	0.30459
	112	8	1.661	0.141	8.48886	1		1.15508	0.0980529
	113	9	2.683	0.182	6.78345	1		1.86579	0.126565
	114	10	1.138	0.09	7.90861	1		0.791377	0.0625869
	115	11	2.188	0.172	7.86106	1		1.52156	0.119611
	116	12	2.199	0.167	7.59436	1		1.52921	0.116134
	117	13	1.916	0.729	38.048	1		1.33241	0.506954
	118	14	1.85	0.124	6.7027	1		1.28651	0.0862309
	119	15	1.397	0.328	23.4789	1		0.971488	0.228095
	120	16	2.236	0.315	14.0877	1		1.55494	0.219054
	121	17	1.536	0.301	19.5964	1		1.06815	0.209318
block 6 image 14	122	1	2.603	0	0	0	0.8	1.81015	0
	123	2	2.577	0.993	38.5332	1		1.79207	0.690542
	124	3	3.06	0.283	9.24837	1		2.12796	0.196801
	125	4	3.013	0.683	22.6684	1		2.09527	0.474965
	126	5	1.684	0.118	7.00713	1		1.17107	0.0820584
	127	6	2.683	0.357	13.306	1		1.86579	0.248261
	128	7	2.617	0.287	10.9668	1		1.81989	0.199583
	129	8	1.316	0.083	6.30699	1		0.91516	0.0577191
	130	9	2.318	0	0	0		1.61196	0
	131	10	3.502	0.363	10.3655	1		2.43533	0.252434
		XBAR	2.50087	0.338855	13.3062		0.879999	1.73913	0.235643
		SIGMA	1.02152	0.308003	10.3647		0.122295	0.710378	0.214189
block 7
image file	mito	location	P(mito)	L(ER-mito)	% app	contact?	% contact	real P(mito)	real L(ER-mito)
block 7 image 1	1	1	2.146	0.151	7.03635	1	1	1.49235	0.105007
	2	2	2.599	0.919	35.3598	1		1.80737	0.639082
	3	3	2.539	0.133	5.23828	1		1.76565	0.0924896
	4	4	2.791	0.207	7.4167	1		1.94089	0.14395
	5	5	1.884	0.2676	14.2038	1		1.31015	0.186092
	6	6	6.314	1.903	30.1394	1		4.39082	1.32337
block 7 image 2	7	1	1.602	0.303	18.9139	1	0.5	1.11405	0.210709
	8	2	0.021	0	0	0		0.0146036	0
	9	3	1.63	0.125	7.66871	1		1.13352	0.0869263
	10	4	1.654	0	0	0		1.15021	0
	11	5	1.103	0	0	0		0.767038	0
	12	6	3.821	1.27	33.2374	1		2.65716	0.883171
block 7 image 3	13	1	2.661	0.643	24.1638	1	1	1.85049	0.447149
	14	2	4.555	1.391	30.5379	1		3.16759	0.967316
	15	3	1.726	0.28	16.2225	1		1.20028	0.194715
	16	4	1.904	0.814	42.7521	1		1.32406	0.566064
	17	5	1.512	0.703	46.4947	1		1.05146	0.488873
	18	6	3.875	0.225	5.80645	1		2.69471	0.156467
	19	7	2.712	1.166	42.9941	1		1.88595	0.810848
	20	8	2.658	0.995	37.4342	1		1.8484	0.691933
block 7 image 4	21	1	4.721	0.94	19.911	1	1	3.28303	0.653686
	22	2	1.536	0.208	13.5417	1		1.06815	0.144645
	23	3	1.355	0.2	14.7601	1		0.942281	0.139082
	24	4	1.392	0.321	23.0603	1		0.968011	0.223227
	25	5	2.712	0.365	13.4587	1		1.88595	0.253825
	26	6	2.754	1.305	47.3856	1		1.91516	0.90751
	27	7	3.198	0.862	26.9543	1		2.22392	0.599444
	28	8	3.965	0.584	14.7289	1		2.7573	0.40612
block 7 image 5	29	1	3.193	0.397	12.4334	1	1	2.22045	0.276078
	30	2	2.929	0	0	0		2.03686	0
	31	3	1.585	0.143	9.02208	1		1.10223	0.0994437
	32	4	3.644	0.69	18.9352	1		2.53408	0.479833
	33	5	1.784	0.264	14.7982	1		1.24061	0.183588
block 7 image 6	34	1	1.288	0.709	55.0466	1	1	0.895688	0.493046
	35	2	1.519	1.043	68.6636	1		1.05633	0.725313
	36	3	1.646	0.565	34.3256	1		1.14465	0.392907
	37	4	2.566	1.394	54.3258	1		1.78442	0.969402
	38	5	1.542	0.445	28.8586	1		1.07232	0.309458
	39	6	0.988	0.349	35.3239	1		0.687065	0.242698
	40	7	1.108	0.463	41.787	1		0.770515	0.321975
	41	8	3.925	1.207	30.7516	1		2.72949	0.83936
block 7 image 7	42	1	2.302	1.045	45.3953	1	1	1.60083	0.726704
	43	2	1.351	0.554	41.0067	1		0.939499	0.385257
	44	3	1.726	0.934	54.1136	1		1.20028	0.649513
	45	4	2.016	0.498	24.7024	1		1.40195	0.346314
	46	5	1.204	0.232	19.2691	1		0.837274	0.161335
	47	6	1.423	0.298	20.9417	1		0.989569	0.207232
	48	7	2.521	0.726	28.7981	1		1.75313	0.504868
block 7 image 8	49	1	5.768	3.138	54.4036	1	1	4.01113	2.1822
	50	2	4.459	2.081	46.6697	1		3.10083	1.44715
	51	3	3.941	1.491	37.833	1		2.74061	1.03686
	52	4	1.397	0.483	34.5741	1		0.971488	0.335883
	53	5	1.921	1.44	74.961	1		1.33588	1.00139
block 7 image 9	54	1	3.175	1.18	37.1654	1	1	2.20793	0.820584
	55	2	2.086	0.749	35.906	1		1.45063	0.520862
	56	3	3.764	0.785	20.8555	1		2.61752	0.545897
	57	4	3.168	0.267	8.42803	1		2.20306	0.185675
block 7 image 10	58	1	2.67	0.175	6.55431	1	1	1.85675	0.121697
	59	2	1.261	0.753	59.7145	1		0.876912	0.523644
	60	3	2.24	0.853	38.0804	1		1.55772	0.593185
	61	4	2.616	1.029	39.3349	1		1.81919	0.715577
block 7 image 11	62	1	4.048	1.376	33.9921	1	1	2.81502	0.956885
	63	2	4.374	2.204	50.3887	1		3.04172	1.53268
	64	3	1.777	0.595	33.4834	1		1.23574	0.413769
block 7 image 12	65	1	5.026	1.023	20.3542	1	1	3.49513	0.711405
	66	2	10.638	4.613	43.3634	1		7.39777	3.20793
	67	3	8.825	3.397	38.4929	1		6.137	2.36231
block 7 image 13	68	1	4.162	0.558	13.407	1	1	2.8943	0.388039
	69	2	12.674	5.482	43.2539	1		8.81363	3.81224
	70	3	2.226	0.296	13.2974	1		1.54798	0.205841
	71	4	5.624	2.379	42.3009	1		3.91099	1.65438
block 7 image 14	72	1	1.659	0.61	36.7691	1	1	1.15369	0.4242
	73	2	4.254	0.693	16.2906	1		2.95828	0.481919
	74	3	2.325	0.358	15.3978	1		1.61683	0.248957
	75	4	4.424	1.333	30.1311	1		3.0765	0.926982
block 7 image 15	76	1	2.631	1	38.0084	1	1	1.82962	0.69541
	77	2	2.383	1.994	83.676	1		1.65716	1.38665
block 7 image 16	78	1	8.481	3.578	42.1884	1	1	5.89777	2.48818
	79	2	9.72	4.328	44.5267	1		6.75939	3.00974
	80	3	1.484	0.241	16.2399	1		1.03199	0.167594
	81	4	3.713	1.794	48.3167	1		2.58206	1.24757
		XBAR	3.09277	0.993983	29.8306		0.96875	2.15074	0.691226
		SIGMA	2.21458	1.05713	17.8226		0.125	1.54004	0.73514
block 8
image file	mito	location	P(mito)	L(ER-mito)	% app	contact?	% contact	real P(mito)	real L(ER-mito)
block 8 image 1	1	1	2.067	0.401	19.4001	1	1	1.43741	0.27886
	2	2	1.587	1.212	76.3705	1		1.10362	0.842837
block 8 image 2	3	1	1.668	0.262	15.7074	1	1	1.15994	0.182197
	4	2	1.856	0.523	28.1789	1		1.29068	0.3637
	5	3	2.408	0.691	28.696	1		1.67455	0.480529
	6	4	1.444	0.083	5.74792	1		1.00417	0.0577191
	7	5	3.458	0.973	28.1377	1		2.40473	0.676634
	8	6	1.256	0.508	40.4459	1		0.873435	0.353268
	9	7	1.285	0.358	27.8599	1		0.893602	0.248957
	10	8	1.862	0.336	18.0451	1		1.29485	0.233658
block 8 image 3	11	1	2.512	1.034	41.1624	1	1	1.74687	0.719054
	12	2	3.166	1.583	50	1		2.20167	1.10083
	13	3	2.135	0.16	7.49415	1		1.4847	0.111266
block 8 image 4	14	1	2.085	0.553	26.5228	1	1	1.44993	0.384562
	15	2	2.185	0.413	18.9016	1		1.51947	0.287204
	16	3	1.537	0.458	29.7983	1		1.06885	0.318498
	17	4	1.432	0.248	17.3184	1		0.995828	0.172462
	18	5	2.232	0.328	14.6953	1		1.55216	0.228095
	19	6	2.671	0.503	18.8319	1		1.85744	0.349791
block 8 image 5	20	1	2.436	0.719	29.5156	1	1	1.69402	0.5
	21	2	1.883	0.522	27.7217	1		1.30946	0.363004
	22	3	3.966	0.842	21.2305	1		2.758	0.585535
	23	4	1.91	0.836	43.7696	1		1.32823	0.581363
	24	5	1.987	0.543	27.3276	1		1.38178	0.377608
	25	6	2.326	1.138	48.9252	1		1.61752	0.791377
	26	7	2.67	0.423	15.8427	1		1.85675	0.294159
	27	8	3.045	1.673	54.9425	1		2.11752	1.16342
block 8 image 6	28	1	2.25	0.819	36.4	1	0.833333	1.56467	0.569541
	29	2	2.015	0.275	13.6476	1		1.40125	0.191238
	30	3	3.017	0.491	16.2744	1		2.09805	0.341446
	31	4	1.733	0	0	0		1.20515	0
	32	5	2.305	0.171	7.41866	1		1.60292	0.118915
	33	6	1.819	0.6	32.9852	1		1.26495	0.417246
block 8 image 7	34	1	3.305	0.716	21.6641	1	1	2.29833	0.497914
	35	2	6.377	1.815	28.4617	1		4.43463	1.26217
block 8 image 8	36	1	2.395	0.413	17.2443	1	1	1.66551	0.287204
	37	2	3.827	0.922	24.092	1		2.66134	0.641168
	38	3	5.137	0.856	16.6634	1		3.57232	0.595271
block 8 image 9	39	1	2.139	0.307	14.3525	1	1	1.48748	0.213491
	40	2	1.472	0.386	26.2228	1		1.02364	0.268428
	41	3	1.958	0.926	47.2932	1		1.36161	0.64395
	42	4	2.618	0.477	18.22	1		1.82058	0.331711
	43	5	1.491	0.296	19.8524	1		1.03686	0.205841
	44	6	3.445	0.85	24.6734	1		2.39569	0.591099
	45	7	2.255	0.613	27.184	1		1.56815	0.426287
block 8 image 10	46	1	3.037	0.221	7.27692	1	0.8	2.11196	0.153686
	47	2	1.792	0	0	0		1.24618	0
	48	3	1.792	0.666	37.1652	1		1.24618	0.463143
	49	4	2.937	1.091	37.1467	1		2.04242	0.758693
	50	5	1.451	0.173	11.9228	1		1.00904	0.120306
block 8 image 11	51	1	4.495	1.462	32.525	1	1	3.12587	1.01669
	52	2	1.685	0.511	30.3264	1		1.17177	0.355355
	53	3	1.474	0.386	26.1872	1		1.02503	0.268428
	54	4	3.392	1.612	47.5236	1		2.35883	1.121
	55	5	2.083	0.749	35.9578	1		1.44854	0.520862
	56	6	2.828	0.48	16.9731	1		1.96662	0.333797
block 8 image 12	57	1	2.419	0.152	6.28359	1	1	1.6822	0.105702
	58	2	3.027	0.858	28.3449	1		2.10501	0.596662
block 8 image 13	59	1	4.026	0.193	4.79384	1	1	2.79972	0.134214
	60	2	4.334	0.159	3.66867	1		3.01391	0.11057
	61	3	1.185	0.277	23.3755	1		0.824061	0.192629
block 8 image 14	62	1	3.753	0.316	8.41993	1	1	2.60987	0.21975
	63	2	4.446	0.683	15.3621	1		3.09179	0.474965
	64	3	3.64	0.855	23.489	1		2.53129	0.594576
block 8 image 17	65	1	7.161	2.019	28.1944	1	1	4.97983	1.40403
	66	2	4.665	0.994	21.3076	1		3.24409	0.691238
	67	3	4.918	2.617	53.2127	1		3.42003	1.81989
	68	4	3.82	1.471	38.5079	1		2.65647	1.02295
block 8 image 18	69	1	4.121	0.997	24.1932	1	1	2.86579	0.693324
	70	2	3.024	1.971	65.1786	1		2.10292	1.37065
	71	3	2.957	2.126	71.8972	1		2.05633	1.47844
block 8 image 19	72	1	3.915	2.478	63.295	1	1	2.72253	1.72323
	73	2	3.086	1.835	59.4621	1		2.14604	1.27608
	74	3	6.873	3.994	58.1115	1		4.77955	2.77747
	75	4	4.058	1.813	44.6772	1		2.82197	1.26078
block 8 image 20	76	1	2.081	0.832	39.9808	1	1	1.44715	0.578581
	77	2	4.068	0.888	21.8289	1		2.82893	0.617524
	78	3	1.714	0.778	45.3909	1		1.19193	0.541029
	79	4	3.53	1.536	43.5127	1		2.4548	1.06815
	80	5	1.728	0.673	38.9468	1		1.20167	0.468011
		XBAR	2.80178	0.826525	28.621		0.97963	1.94838	0.574774
		SIGMA	1.26288	0.68568	16.6562		0.0595615	0.878223	0.476829

## Sheet: 1-S1B to D
Numerical source data for Figure 1-figure supplement 1B to D
		scale	real		100 nm				50 nm				25 nm
	7k	500	0.44		0.088				0.044				0.022
	9k	500	0.62		0.124				0.062				0.031
	11k	500	0.73		0.146				0.073				0.0365
	13k	500	0.84		0.168				0.084				0.042
					<100 nm contacts				<50 nm contacts				<25 nm contacts
image file	mito	location	P(mito)		L(ER-mito)	% app	% con		L(ER-mito)	% app	% con		L(ER-mito)	% app	% con
block 8: GFP-parkin untreated
image 1 7k	1	1	1.817		0.266	14.6395	100		0.118	6.49422	100		0.118	6.49422	100
	2	2	2.292		0.824	35.9511			0.293	12.7836			0.169	7.37347
	3	3	5.228		1.532	29.3037			0.8	15.3022			0.342	6.5417
image 2 11k	4	1	5.007		0.239	4.77332	100		0.239	4.77332	100		0.239	4.77332	100
	5	2	2.085		0.811	38.8969			0.811	38.8969			0.514	24.6523
	6	3	4.413		1.288	29.1865			0.487	11.0356			0.359	8.13506
	7	4	6.015		1.542	25.6359			1.231	20.4655			0.626	10.4073
image 3 9k	8	1	1.185		0	0	85.7143		0	0	85.7143		0	0	14.2857
	9	2	1.339		0.682	50.9335			0.529	39.5071			0	0
	10	3	0.984		0.244	24.7967			0.244	24.7967			0	0
	11	4	3.003		0.775	25.8075			0.574	19.1142			0.322	10.7226
	12	5	1.313		0.95	72.3534			0.95	72.3534			0	0
	13	6	1.554		0.67	43.1145			0.291	18.7259			0	0
	14	7	1.658		0.234	14.1134			0.234	14.1134			0	0
image 4 13k	15	1	10.217		3.672	35.9401	100		2.569	25.1444	100		2.049	20.0548	100
image 5 9k	16	1	5.921		1.807	30.5185	100		0.956	16.1459	100		0.882	14.8961	50
	17	2	1.972		0.638	32.3529			0.196	9.93915			0	0
image 6 13k	18	1	18.864		3.48	18.4478	100		0.765	4.05534	100		0.765	4.05534	50
	19	2	2.406		0.462	19.202			0.147	6.10973			0	0
image 7 13k	20	1	2.17		0.709	32.6728	100		0.347	15.9908	100		0.347	15.9908	50
	21	2	2.678		0.532	19.8656			0.145	5.41449			0	0
image 8 11k	22	1	1.56		0.319	20.4487	100		0.181	11.6026	100		0.181	11.6026	100
	23	2	7.145		0.956	13.38			0.956	13.38			0.302	4.22673
image 9 9k	24	1	3.098		0.301	9.71595	100		0.205	6.61717	100		0.088	2.84054	66.6667
	25	2	2.852		0.297	10.4137			0.13	4.5582			0	0
	26	3	1.723		0.806	46.7789			0.806	46.7789			0.16	9.28613
image 10 13k	27	1	3.226		0	0	66.6667		0	0	66.6667		0	0	66.6667
	28	2	1.847		0.241	13.0482			0.241	13.0482			0.241	13.0482
	29	3	10.633		2.035	19.1385			1.625	15.2826			0.746	7.01589
image 11 13k	30	1	9.68		1.108	11.4463	100		0.249	2.57231	100		0.249	2.57231	100
image 12 9k	31	1	2.123		0.304	14.3194	100		0.304	14.3194	100		0.304	14.3194	100
	32	2	4.536		1.608	35.4497			1.608	35.4497			1.003	22.112
	33	3	1.607		0.247	15.3703			0.247	15.3703			0.116	7.21842
	34	4	2.873		0.353	12.2868			0.353	12.2868			0.353	12.2868
	35	5	6.089		2.395	39.3332			2.395	39.3332			2.395	39.3332
image 13 9k	36	1	3.049		1.262	41.3906	100		0.373	12.2335	100		0.373	12.2335	100
	37	2	5.323		1.931	36.2765			1.308	24.5726			1.046	19.6506
	38	3	3.633		1.047	28.8192			0.569	15.662			0.359	9.88164
	39	4	2.366		0.97	40.9975			0.42	17.7515			0.329	13.9053
image 14 9k	40	1	3.599		0.664	18.4496	100		0.664	18.4496	100		0.277	7.69658	66.6667
	41	2	3.045		0.905	29.7209			0.905	29.7209			0.291	9.55665
	42	3	3.431		1.202	35.0335			1.076	31.3611			0	0
image 15 9k	43	1	4.824		1.256	26.0365	100		0.856	17.7446	100		0.553	11.4635	75
	44	2	1.941		0.517	26.6358			0.517	26.6358			0	0
	45	3	1.86		0.614	33.0108			0.614	33.0108			0.14	7.52688
	46	4	7.236		1.241	17.1504			0.897	12.3964			0.125	1.72747
image 16 7k	47	1	6.417		1.236	19.2613	100		1.171	18.2484	100		0	0	60
	48	2	0.944		0.189	20.0212			0.084	8.89831			0.084	8.89831
	49	3	1.215		0.369	30.3704			0.184	15.144			0.055	4.52675
	50	4	3.272		0.723	22.0966			0.314	9.59658			0.314	9.59658
	51	5	1.529		0.383	25.0491			0.383	25.0491			0	0
	52	6	1.639		0.329	20.0732			0.329	20.0732			0	0
	53	7	1.795		0.907	50.5292			0.635	35.376			0	0
	54	8	3.185		1.377	43.2339			1.105	34.6939			0.122	3.83046
	55	9	9.804		3.209	32.7315			2.8	28.5598			1.4	14.2799
	56	10	2.489		0.898	36.0787			0.898	36.0787			0.521	20.9321
image 17 7k	57	1	1.795		1.201	66.9081	100		1.201	66.9081	100		0.739	41.1699	84.6154
	58	2	1.493		0.219	14.6685			0.219	14.6685			0.219	14.6685
	59	3	14.09		8.342	59.2051			6.828	48.4599			3.229	22.917
	60	4	2.141		1.238	57.8234			1.091	50.9575			0.567	26.483
	61	5	4.777		2.648	55.4323			2.378	49.7802			1.121	23.4666
	62	6	2.278		1.536	67.4276			1.242	54.5215			0.812	35.6453
	63	7	2.309		1.01	43.7419			1.01	43.7419			0.235	10.1776
	64	8	6.365		3.4	53.4171			3.4	53.4171			0.776	12.1917
	65	9	3.926		2.125	54.1263			1.788	45.5425			0.464	11.8186
	66	10	5.787		2.886	49.8704			2.886	49.8704			0	0
	67	11	5.089		2.319	45.5689			2.319	45.5689			0	0
	68	12	1.485		0.896	60.3367			0.896	60.3367			0.559	37.6431
	69	13	2.209		0.827	37.4378			0.53	23.9928			0.156	7.06202
image 18 7k	70	1	2.239		0.697	31.13	100		0.697	31.13	100		0.697	31.13	75
	71	2	2.577		1.109	43.0345			1.109	43.0345			0.509	19.7516
	72	3	2.74		0.464	16.9343			0.464	16.9343			0.464	16.9343
	73	4	2.272		1.879	82.7025			1.879	82.7025			0.422	18.5739
	74	5	2.862		1.377	48.1132			1.377	48.1132			0.26	9.08456
	75	6	1.816		1.2	66.0793			1.2	66.0793			0	0
	76	7	4.947		1.944	39.2965			1.944	39.2965			0	0
	77	8	2.777		0.933	33.5974			0.933	33.5974			0.584	21.0299
image 19 7k	78	1	1.74		0.469	26.954			0.469	26.954			0.187	10.7471
	79	2	1.916		0.539	28.1315			0.325	16.9624			0.214	11.1691
	80	3	4.049		1.32	32.6006			0.83	20.4989			0.651	16.078
	81	4	3.155		0.813	25.7686			0.509	16.1331			0.509	16.1331
	82	5	2.873		1.022	35.5726			1.022	35.5726			0	0
	83	6	5.885		1.234	20.9686			1.234	20.9686			0.418	7.1028
			XBAR			32.403	97.3545			26.3706	97.3545			10.321	75.4945
			SIGMA			16.8963	8.36385			17.93	8.36385			9.99393	24.8023
block 6: GFP-parkin + CCCP
image 1 7k	1	1	1.379		0.366	26.541	66.6667		0.366	26.541	50		0	0	33.3333
	2	2	1.445		0.383	26.5052			0.383	26.5052			0.096	6.6436
	3	3	1.184		0	0			0	0			0	0
	4	4	1.122		0	0			0	0			0	0
	5	5	2.282		0.217	9.5092			0.217	9.5092			0.217	9.5092
	6	6	2.116		0.177	8.36484			0	0			0	0
image 10 9k	7	1	2.89		0.118	4.08304	50		0.118	4.08304	50		0	0	0
	8	2	1.834		0	0			0	0			0	0
image 2 7k	9	1	1.834		0.093	5.07088	50		0.093	5.07088	12.5		0	0	0
	10	2	1.278		0.236	18.4664			0	0			0	0
	11	3	1.884		0	0			0	0			0	0
	12	4	1.71		0	0			0	0			0	0
	13	5	1.306		0.206	15.7734			0	0			0	0
	14	6	1.172		0	0			0	0			0	0
	15	7	1.957		0	0			0	0			0	0
	16	8	2.205		0.651	29.5238			0	0			0	0
image 3 7k	17	1	2.016		0.162	8.03571	53.8462		0	0	46.1538		0	0	38.4615
	18	2	1.404		0	0			0	0			0	0
	19	3	1.629		0	0			0	0			0	0
	20	4	2.763		0	0			0	0			0	0
	21	5	2.522		0	0			0	0			0	0
	22	6	1.183		0.055	4.6492			0.055	4.6492			0.055	4.6492
	23	7	2.53		0.115	4.54545			0.115	4.54545			0.115	4.54545
	24	8	3.903		0.262	6.71279			0.262	6.71279			0.262	6.71279
	25	9	2.29		0.391	17.0742			0.166	7.24891			0	0
	26	10	2.059		0.061	2.9626			0.061	2.9626			0.061	2.9626
	27	11	2.035		0	0			0	0			0	0
	28	12	1.388		0	0			0	0			0	0
	29	13	1.711		0.128	7.48101			0.128	7.48101			0.065	3.79895
image 4 11k	30	1	3.359		0.13	3.8702	66.6667		0.13	3.8702	33.3333		0	0	0
	31	2	3.965		0	0			0	0			0	0
	32	3	1.861		0.34	18.2697			0.34	18.2697			0	0
	33	4	3.608		0.282	7.81596			0	0			0	0
	34	5	2.512		0	0			0	0			0	0
	35	6	2.172		0.232	10.6814			0	0			0	0
image 5 9k	36	1	3.445		0.145	4.209	62.5		0.145	4.209	25		0	0	12.5
	37	2	3.104		0.134	4.31701			0	0			0	0
	38	3	1.628		0.412	25.3071			0.327	20.086			0.327	20.086
	39	4	2.043		0.148	7.24425			0	0			0	0
	40	5	4.047		0.175	4.32419			0	0			0	0
	41	6	1.698		0	0			0	0			0	0
	42	7	3.402		0	0			0	0			0	0
	43	8	2.492		0	0			0	0			0	0
image 6 9k	44	1	3.754		0.22	5.86042	53.8462		0.22	5.86042	30.7692		0	0	15.3846
	45	2	1.465		0	0			0	0			0	0
	46	3	1.901		0.211	11.0994			0.211	11.0994			0.211	11.0994
	47	4	2.367		0.074	3.12632			0.074	3.12632			0.074	3.12632
	48	5	5.672		0.401	7.06982			0	0			0	0
	49	8	3.946		0.118	2.99037			0.118	2.99037			0	0
	50	9	2.873		0	0			0	0			0	0
	51	10	3.466		0	0			0	0			0	0
	52	11	3.436		0.122	3.55064			0	0			0	0
	53	12	1.291		0.122	9.45004			0	0			0	0
	54	13	3.349		0	0			0	0			0	0
image 7 11k	55	1	1.727		0	0	60		0	0	30		0	0	30
	56	2	3.07		0	0			0	0			0	0
	57	3	1.432		0	0			0	0			0	0
	58	4	1.841		0.258	14.0141			0.258	14.0141			0.258	14.0141
	59	5	2.534		0.269	10.6156			0.269	10.6156			0.269	10.6156
	60	6	3.155		0.337	10.6815			0.337	10.6815			0.337	10.6815
	61	7	1.785		0	0			0	0			0	0
	62	8	2.256		0	0			0	0			0	0
	63	9	1.563		0.134	8.57326			0	0			0	0
	64	10	2.024		0	0			0	0			0	0
image 8 9k	65	1	1.749		0.98	56.032	63.6364		0.416	23.785	54.5455		0.304	17.3814	27.2727
	66	2	2.043		0	0			0	0			0	0
	67	3	1.882		0	0			0	0			0	0
	68	4	3.984		0.636	15.9639			0.098	2.45984			0.098	2.45984
	69	5	1.593		0.131	8.22348			0	0			0	0
	70	6	1.792		0.185	10.3237			0.074	4.12946			0	0
	71	7	2.78		0	0			0	0			0	0
	72	8	2.589		0.397	15.3341			0.397	15.3341			0	0
	73	9	2.235		0.103	4.6085			0.103	4.6085			0	0
	74	10	1.424		0	0			0	0			0	0
	75	11	4.362		0.126	2.88858			0.126	2.88858			0.126	2.88858
image 9 7k	76	1	4.583		0.931	20.3142	100		0.662	14.4447	83.3333		0.662	14.4447	33.3333
	77	2	1.541		0.269	17.4562			0.269	17.4562			0	0
	78	3	1.799		0.425	23.6242			0.425	23.6242			0	0
	79	4	1.879		0.108	5.74774			0.108	5.74774			0.108	5.74774
	80	5	3.031		0.865	28.5384			0.865	28.5384			0	0
	81	6	2.415		0.261	10.8075			0	0			0	0
image 11 7k	82	1	1.609		0	0	30		0	0	30		0	0	30
	83	2	2.794		0.167	5.97709			0.167	5.97709			0.167	5.97709
	84	3	1.862		0	0			0	0			0	0
	85	4	1.072		0	0			0	0			0	0
	86	5	1.86		0	0			0	0			0	0
	87	6	3.033		0.15	4.9456			0.15	4.9456			0.15	4.9456
	88	7	3.629		0.092	2.53513			0.092	2.53513			0.092	2.53513
	89	8	1.953		0	0			0	0			0	0
	90	9	3.608		0	0			0	0			0	0
	91	10	2.565		0	0			0	0			0	0
image 12 7k	92	1	3.809		0	0	30.7692		0	0	7.69231		0	0	0
	93	2	1.193		0	0			0	0			0	0
	94	3	2.06		0.182	8.83495			0.182	8.83495			0	0
	95	4	1.467		0	0			0	0			0	0
	96	5	1.467		0	0			0	0			0	0
	97	6	3.764		0.318	8.44846			0	0			0	0
	98	7	2.196		0	0			0	0			0	0
	99	8	2.346		0	0			0	0			0	0
	100	9	2.253		0.291	12.9161			0	0			0	0
	101	10	2.196		0	0			0	0			0	0
	102	11	1.593		0	0			0	0			0	0
	103	12	1.251		0	0			0	0			0	0
	104	13	2.545		0.291	11.4342			0	0			0	0
image 13 7k	105	1	1.67		0	0	75		0	0	75		0	0	75
	106	2	2.21		0.199	9.00452			0.199	9.00452			0.199	9.00452
	107	3	1.163		0	0			0	0			0	0
	108	4	1.787		0	0			0	0			0	0
image 14 9k	109	1	2.913		0	0	28.5714		0	0	28.5714		0	0	28.5714
	110	2	0.837		0	0			0	0			0	0
	111	3	1.756		0	0			0	0			0	0
	112	4	2.535		0.14	5.52268			0.14	5.52268			0.14	5.52268
	113	5	1.805		0	0			0	0			0	0
	114	6	3.243		0.133	4.10114			0.133	4.10114			0.133	4.10114
	115	7	2.147		0	0			0	0			0	0
image 15 9k	116	1	3.038		0.316	10.4016	77.7778		0	0	33.3333		0	0	11.1111
	117	2	3.043		1.243	40.8478			0.715	23.4965			0.148	4.86362
	118	3	1.951		0.289	14.8129			0.289	14.8129			0	0
	119	4	1.927		0	0			0	0			0	0
	120	5	1.413		0	0			0	0			0	0
	121	6	1.633		0.153	9.36926			0.153	9.36926			0	0
	122	7	1.958		0.593	30.286			0	0			0	0
	123	8	1.833		0.244	13.3115			0	0			0	0
	124	9	1.7		0.254	14.9412			0	0			0	0
image 16 11k	125	1	4.431		0	0	47.0588		0	0	35.2941		0	0	5.88235
	126	2	2.45		0	0			0	0			0	0
	127	3	2.296		0	0			0	0			0	0
	128	4	3.423		0	0			0	0			0	0
	129	5	2.956		0.522	17.659			0.522	17.659			0	0
	130	6	3.843		0.799	20.791			0.799	20.791			0	0
	131	7	2.842		1.134	39.9015			0.865	30.4363			0	0
	132	8	2.784		0.156	5.60345			0.156	5.60345			0.156	5.60345
	133	9	3.485		0	0			0	0			0	0
	134	10	2.605		0	0			0	0			0	0
	135	11	2.451		0	0			0	0			0	0
	136	12	2.51		0	0			0	0			0	0
	137	13	2.123		0	0			0	0			0	0
	138	14	2.927		0.279	9.53194			0.279	9.53194			0	0
	139	15	1.885		0.212	11.2467			0	0			0	0
	140	16	1.875		0.461	24.5867			0.461	24.5867			0	0
	141	17	3.1		0.69	22.2581			0	0			0	0
image 17 9k	142	1	1.94		0	0	44.4444		0	0	33.3333		0	0	9.09091
	143	2	1.89		0	0			0	0			0	0
	144	3	2.052		0	0			0	0			0	0
	145	4	3.011		0	0			0	0			0	0
	146	5	2.375		0.567	23.8737			0	0			0	0
	147	6	2.584		0.271	10.4876			0.271	10.4876			0	0
	148	7	2.482		0	0			0	0			0	0
	149	8	3.066		0.507	16.5362			0.153	4.99022			0	0
	150	9	2.764		0.896	32.4168			0.896	32.4168			0.214	7.7424
			XBAR			6.8721	56.5167			3.98834	38.7565			1.34442	20.5848
			SIGMA			9.83016	18.4907			7.42549	19.5612			3.47744	19.5525
sample	XBAR	%_rel	%_fraction
untreated 100 nm	32.403	6.032	18.6156		100
untreated 50 nm	26.371	16.05	49.5325
untreated 25 nm	10.321	10.321	31.852
CCCP 100 nm	6.872	2.884	41.9674		100
CCCP 50 nm	3.988	2.644	38.475
CCCP 25 nm	1.344	1.344	19.5576
