# Supplementary material for: Mfn2 ubiquitination by PINK1/parkin gates the p97-dependent release of ER from mitochondria to drive mitophagy
Source: eLife. 2018 Apr 20;7:e32866. doi: 10.7554/eLife.32866 (PMC5927771; doi:10.7554/eLife.32866)
Supplement: Figure 3—source data 1. [file elife-32866-fig3-data1.xlsx]

## Sheet: 3D,E and G
Numerical source data for Figure 3D and E
media	siRNA	CCCP (h)	YES	NO	% YES		YES	NO	% YES		YES	NO	% YES
glucose	ctrl siRNA	0	0	100	0		0	100	0		0	100	0
		1	71	46	60.6838		92	30	75.4098		61	41	59.8039
		4	98	8	92.4528		122	1	99.187		111	1	99.1071
	siMfn1	0	0	100	0		0	100	0		0	100	0
		1	105	61	63.253		84	24	77.7778		71	36	66.3551
		4	97	6	94.1748		99	1	99		109	1	99.0909
	siMfn2	0	0	100	0		0	100	0		0	100	0
		1	92	14	86.7925		96	14	87.2727		105	18	85.3659
		4	98	4	96.0784		100	0	100		100	0	100
galactose	ctrl siRNA	0	0	100	0		0	100	0		0	100	0
		1	14	100	12.2807		8	102	7.27273		4	105	3.66972
		4	115	17	87.1212		95	14	87.156		84	11	88.4211
	siMfn1	0	0	100	0		0	100	0		0	100	0
		1	12	94	11.3208		8	92	8		6	94	6
		4	98	18	84.4828		119	12	90.8397		107	6	94.6903
	siMfn2	0	0	100	0		0	100	0		0	100	0
		1	92	34	73.0159		50	52	49.0196		62	47	56.8807
		4	106	6	94.6429		115	6	95.0413		99	8	92.5234
Numerical source data for Figure 3G
	DMSO			CCCP
ctrl siRNA	5.59	9.11		10.4	18.4
siMfn1	3.24	6.48		8.72	16.4
siMfn2	6.63	12.9		27.1	41.5
ctrl siRNA	4.61	7.67		4.71	8.47
ctrl siRNA	3.03	5.07		3.48	6.35
siMfn1	1.66	3.1		3.9	8.12
siMfn2	2.28	4.38		12	20.4
ctrl siRNA	3.05	5.03		2.85	4.51

## Sheet: 3-S1B to D
Numerical source data for Figure 3-figure supplement 1B to D
block 1	500 nm = 0.31
ctrl siRNA
glucose
image file	mito	location	P(OMM)	L(ER-OMM)	% app	L(mito)	actual L(mito)	contact?
block 1 image 1	1	1	2.338	0.246	10.5218	1.036	1.67097	1
	2	2	0.879	0.565	64.2776	0.324	0.522581	1
	3	3	0.82	0.628	76.5854	0.328	0.529032	1
	4	4	1.904	0.993	52.1534	0.857	1.38226	1
	5	5	3.448	0.803	23.2889	1.517	2.44677	1
	6	6	3.899	1.02	26.1606	1.798	2.9	1
	7	7	3.941	0.976	24.7653	1.701	2.74355	1
	8	8	2.111	0.331	15.6798	0.951	1.53387	1
block 1 image 2	9	1	3.12	1.064	34.1026	1.42	2.29032	1
	10	2	3.931	2.528	64.3093	1.698	2.73871	1
	11	3	0.958	0.315	32.881	0.344	0.554839	1
	12	4	5.387	0.934	17.338	2.474	3.99032	1
	13	5	0.992	0.706	71.1694	0.326	0.525806	1
block 1 image 3	14	1	4.328	1.054	24.353	2.008	3.23871	1
	15	2	2.218	0.795	35.8431	0.967	1.55968	1
	16	3	1.114	0.453	40.6643	0.469	0.756452	1
	17	4	6.06	2.73	45.0495	2.216	3.57419	1
	18	5	2.595	0.724	27.8998	1.258	2.02903	1
	19	6	3.237	1.629	50.3244	1.428	2.30323	1
	20	7	2.786	0.907	32.5556	1.243	2.00484	1
	21	8	2.113	0.982	46.4742	0.827	1.33387	1
	22	9	2.537	0.921	36.3027	1.103	1.77903	1
block 1 image 4	23	1	5.853	2.233	38.1514	2.803	4.52097	1
	24	2	1.056	0.351	33.2386	0.416	0.670968	1
	25	3	2.646	0.962	36.3568	1.251	2.01774	1
	26	4	1.73	0.975	56.3584	0.788	1.27097	1
	27	5	0.88	0.485	55.1136	0.287	0.462903	1
	28	6	1.46	0.494	33.8356	0.643	1.0371	1
	29	7	0.792	0.381	48.1061	0.273	0.440323	1
	30	8	1.376	0.546	39.6802	0.533	0.859677	1
	31	9	1.672	0.391	23.3852	0.733	1.18226	1
	32	10	0.826	0.248	30.0242	0.273	0.440323	1
	33	11	2.267	0.565	24.9228	0.978	1.57742	1
	34	12	1.095	0.547	49.9543	0.45	0.725806	1
	35	13	4.134	3.196	77.3101	1.849	2.98226	1
	36	14	7.155	5.083	71.0412	3.197	5.15645	1
	37	15	1.524	1.258	82.5459	0.682	1.1	1
	38	16	0.889	0.679	76.378	0.412	0.664516	1
	39	17	2.938	1.206	41.0483	0.573	0.924194	1
	40	18	1.073	0.812	75.6757	0.408	0.658065	1
	41	19	2.485	1.621	65.2314	1.136	1.83226	1
	42	20	2.352	1.572	66.8367	0.956	1.54194	1
block 1 image 5	43	1	2.956	1.733	58.6265	1.382	2.22903	1
	44	2	0.894	0.721	80.6488	0.364	0.587097	1
	45	3	0.85	0.815	95.8824	0.33	0.532258	1
	46	4	2.443	1.503	61.5227	1.141	1.84032	1
	47	5	4.731	2.696	56.9858	1.872	3.01935	1
	48	6	1.135	0.726	63.9648	0.406	0.654839	1
	49	7	2.898	0.83	28.6404	1.324	2.13548	1
	50	8	1.098	0.153	13.9344	0.346	0.558065	1
	51	9	4.586	1.637	35.6956	1.895	3.05645	1
	52	10	1.85	0.718	38.8108	0.668	1.07742	1
	53	11	1.84	0.52	28.2609	0.823	1.32742	1
	54	12	1.945	1.26	64.7815	0.866	1.39677	1
	55	13	1.473	1.296	87.9837	0.529	0.853226	1
	56	14	1.713	0.784	45.7677	0.568	0.916129	1
	57	15	1.597	0.789	49.4051	0.431	0.695161	1
	58	16	0.993	0.333	33.5347	0.33	0.532258	1
block 1 image 8	59	1	1.947	1.119	57.473	0.944	1.52258	1
	60	2	2.665	0.599	22.4765	1.246	2.00968	1
	61	3	1.436	0.788	54.8747	0.623	1.00484	1
	62	4	0.88	0.499	56.7045	0.334	0.53871	1
	63	5	1.017	0.378	37.1681	0.392	0.632258	1
	63	6	1.335	0.794	59.4757	0.519	0.837097	1
	64	7	4.625	1.381	29.8595	2.006	3.23548	1
	65	8	4.881	2.85	58.3897	1.995	3.21774	1
	66	9	4.786	1.437	30.0251	1.835	2.95968	1
		XBAR	2.41034	1.0637	46.6983	1.01646	1.63946
			1.50701	0.828828	19.8728	0.679206	1.09549
block 2
siMfn1
glucose
image file	mito	location	P(OMM)	L(ER-OMM)	% app	L(mito)	actual L(mito)	contact?
block 2 image 1	1	1	1.245	0.52	41.7671	0.42	0.677419	1
	2	2	1.62	0.194	11.9753	0.629	1.01452	1
	3	3	1.632	0.396	24.2647	0.579	0.933871	1
	4	4	1.405	0.373	26.548	0.487	0.785484	1
	5	5	1.704	0.987	57.9225	0.757	1.22097	1
	6	6	0.871	0.161	18.4845	0.328	0.529032	1
	7	7	1.728	0.509	29.456	0.635	1.02419	1
	8	8	1.888	0.553	29.2903	0.821	1.32419	1
block 2 image 2	9	1	2.895	1.021	35.2677	1	1.6129	1
	10	2	1.233	0.239	19.3836	0.508	0.819355	1
	11	3	1.485	0.355	23.9057	0.591	0.953226	1
	12	4	1.34	0.114	8.50746	0.559	0.901613	1
	13	5	1.252	0.256	20.4473	0.465	0.75	1
	14	6	1.095	0.321	29.3151	0.388	0.625806	1
	15	7	2.532	0.722	28.515	1.195	1.92742	1
	16	8	2.369	1.287	54.3267	0.915	1.47581	1
	17	9	2.064	1.127	54.6027	0.802	1.29355	1
	18	10	1.199	1.055	87.99	0.467	0.753226	1
	19	11	3.773	2.305	61.092	1.718	2.77097	1
	20	12	4.498	1.39	30.9026	2.097	3.38226	1
	21	13	1.816	0.736	40.5286	0.632	1.01935	1
	22	14	0.964	0.402	41.7012	0.317	0.51129	1
	23	15	1.717	1.29	75.131	0.557	0.898387	1
	24	16	2.848	1.66	58.2865	1.135	1.83065	1
	25	17	2.589	0.738	28.5052	1.092	1.76129	1
	26	18	1.183	0.268	22.6543	0.447	0.720968	1
	27	19	1.618	0.622	38.4425	0.546	0.880645	1
	28	20	2.815	1.358	48.2416	1.139	1.8371	1
	29	21	1.535	1.005	65.4723	0.589	0.95	1
	30	22	0.866	0.379	43.7644	0.352	0.567742	1
	31	23	1.527	0.778	50.9496	0.649	1.04677	1
	32	24	2.244	1.578	70.3209	0.881	1.42097	1
	33	25	1.121	0.431	38.4478	0.33	0.532258	1
block 2 image 3	34	1	1.389	0.808	58.1713	0.581	0.937097	1
	35	2	1.535	0.376	24.4951	0.668	1.07742	1
	36	3	3.277	1.057	32.2551	1.159	1.86935	1
block 2 image 4	37	1	1.724	0.648	37.587	0.76	1.22581	1
	38	2	1.404	0.55	39.1738	0.512	0.825806	1
	39	3	2.253	0.254	11.2739	0.937	1.51129	1
	40	4	1.474	0.346	23.4735	0.569	0.917742	1
	41	5	1.796	0.674	37.5278	0.75	1.20968	1
	42	6	3.452	1.362	39.4554	1.404	2.26452	1
	43	7	1.002	0.359	35.8283	0.372	0.6	1
	44	8	1.553	0.622	40.0515	0.515	0.830645	1
	45	9	1.844	0.632	34.2733	0.765	1.23387	1
	46	10	1.343	0.893	66.4929	0.505	0.814516	1
	47	11	1.381	0.809	58.5807	0.436	0.703226	1
	48	12	1.998	0.799	39.99	0.824	1.32903	1
	49	13	1.393	0.457	32.8069	0.447	0.720968	1
	50	14	1.045	0.281	26.89	0.362	0.583871	1
	51	15	1.332	0.543	40.7658	0.489	0.78871	1
	52	16	1.448	0.777	53.6602	0.527	0.85	1
	53	17	2.151	1.065	49.5119	0.807	1.30161	1
	54	18	3.223	1.055	32.7335	1.497	2.41452	1
block 2 image 5	55	1	1.838	0.18	9.79325	0.793	1.27903	1
	56	2	1.9	0.433	22.7895	0.801	1.29194	1
	57	3	1.142	0.742	64.9737	0.424	0.683871	1
	58	4	1.216	0.598	49.1776	0.394	0.635484	1
	59	5	1.367	0.665	48.6467	0.503	0.81129	1
	60	6	2.42	1.126	46.5289	0.968	1.56129	1
	61	7	1.043	0.666	63.8543	0.376	0.606452	1
	62	8	1.368	0.467	34.1374	0.521	0.840323	1
	63	9	1.9	0.753	39.6316	0.754	1.21613	1
	64	10	1.137	0.912	80.2111	0.404	0.651613	1
	65	11	0.931	0.486	52.2019	0.274	0.441935	1
	66	12	1.239	0.816	65.8596	0.503	0.81129	1
	67	13	0.966	0.733	75.8799	0.374	0.603226	1
		XBAR	1.74858	0.717522	41.5686	0.686597	1.10741
		SIGMA	0.740352	0.4119	17.9099	0.346102	0.558229
block 3
siMfn2
glucose
image file	mito	location	P(OMM)	L(ER-OMM)	% app	L(mito)	actual L(mito)	contact?
block 3 image 1	1	1	2.54	0.238	9.37008	1.071	1.72742	1
	2	2	4.707	0.333	7.07457	2.014	3.24839	1
	3	3	3.822	0.378	9.89011	1.724	2.78065	1
	4	4	4.057	0.669	16.49	1.612	2.6	1
	5	5	3.518	0.306	8.69812	1.455	2.34677	1
	6	6	2.184	0.145	6.63919	0.738	1.19032	1
	7	7	1.15	0.396	34.4348	0.372	0.6	1
	8	8	1.317	0.2	15.186	0.499	0.804839	1
	9	9	1.711	0.306	17.8843	0.667	1.07581	1
block 3 image 2	10	1	0.725	0	0	0.72	1.16129	0
block 3 image 3	11	2	2.029	0	0	0.787	1.26935	0
block 3 image 4	12	3	2.145	0.699	32.5874	0.823	1.32742	1
block 3 image 5	13	4	2.853	0.256	8.97301	1.183	1.90806	1
block 3 image 6	14	5	1.214	0	0	0.39	0.629032	0
	15	6	2.15	0.452	21.0233	0.828	1.33548	1
	16	7	2.214	0.469	21.1834	0.913	1.47258	1
	17	8	1.133	0.235	20.7414	0.379	0.61129	1
	18	9	1.208	0.151	12.5	0.403	0.65	1
	19	10	1.114	0.069	6.1939	0.411	0.662903	1
	20	11	1.105	0.424	38.371	0.411	0.662903	1
	21	12	1.724	0	0	0.562	0.906452	0
	22	13	1.202	0.308	25.624	0.414	0.667742	1
	23	14	0.359	0	0	0.526	0.848387	0
	24	15	1.594	0	0	0.53	0.854839	0
	25	16	2.111	0.801	37.9441	0.831	1.34032	1
	26	17	2.591	0.338	13.0452	1.023	1.65	1
	27	18	1.637	0	0	0.627	1.01129	0
	28	19	2.23	0	0	0.926	1.49355	0
	29	20	1.444	0.089	6.16343	0.508	0.819355	1
	30	21	1.858	0.607	32.6695	0.72	1.16129	1
	31	22	1.906	0.304	15.9496	0.747	1.20484	1
	32	23	1.234	0.113	9.15721	0.415	0.669355	1
	33	24	1.382	0.265	19.1751	0.468	0.754839	1
	34	25	1.344	0	0	0.524	0.845161	0
	35	26	1.426	0.112	7.85414	0.511	0.824194	1
	36	27	1.375	0.097	7.05455	0.456	0.735484	1
	37	28	1.345	0.063	4.68401	0.467	0.753226	1
	38	29	1.491	0.739	49.5641	0.508	0.819355	1
	39	30	1.408	0.227	16.1222	0.524	0.845161	1
	40	31	1.424	0.133	9.33989	0.447	0.720968	1
	41	32	1.811	0.967	53.3959	0.676	1.09032	1
	42	33	1.63	0.537	32.9448	0.622	1.00323	1
	43	34	0.962	0.249	25.8836	0.305	0.491935	1
	44	35	2.138	0.089	4.16277	0.876	1.4129	1
	45	36	2.096	0.085	4.05534	0.826	1.33226	1
	46	37	1.614	0	0	0.65	1.04839	0
block 3 image 7	47	1	1.961	0.858	43.7532	0.646	1.04194	1
	48	2	2.175	0.07	3.21839	0.866	1.39677	1
	49	3	2.168	0.188	8.67159	0.863	1.39194	1
	50	4	1.142	0.228	19.965	0.403	0.65	1
	51	5	1.165	0.195	16.7382	0.369	0.595161	1
	52	6	2.277	0.501	22.0026	0.865	1.39516	1
	53	7	2.192	0.259	11.8157	0.922	1.4871	1
	54	8	1.21	0.535	44.2149	0.452	0.729032	1
	55	9	1.198	0.143	11.9366	0.46	0.741935	1
	56	10	1.524	0.271	17.7822	0.618	0.996774	1
	57	11	2.845	0.124	4.35852	1.216	1.96129	1
	58	12	2.29	0.986	43.0568	0.844	1.36129	1
	59	13	1.933	0.669	34.6094	0.71	1.14516	1
	60	14	0.194	0.065	33.5052	0.825	1.33065	1
	61	15	2.166	0.188	8.67959	0.761	1.22742	1
	62	16	0.936	0.465	49.6795	0.309	0.498387	1
	63	17	1.619	0.203	12.5386	0.561	0.904839	1
	64	18	1.146	0	0	0.427	0.68871	0
	65	19	1.487	0	0	0.505	0.814516	0
	66	20	1.827	0	0	0.563	0.908065	0
	67	21	1.136	0.074	6.51408	0.427	0.68871	1
	68	22	2.178	0.524	24.0588	0.9	1.45161	1
	69	23	1.048	0.236	22.5191	0.416	0.670968	1
	70	24	2.187	0.613	28.0293	0.966	1.55806	1
		XBAR	1.7748	0.274914	16.1382	0.699757	1.12864
		SIGMA	0.778713	0.254417	14.4673	0.332045	0.535557

## Sheet: 3-S2B
Numerical source data for Figure 3-figure supplement 2B
glucose vs. galactose
	media	CCCP (h)	YES	NO	% YES		YES	NO	% YES		YES	NO	% YES
	glucose	0	0	100	0		0	100	0		0	100	0
		1	82	19	81.1881		99	12	89.1892		97	17	85.0877
		4	108	4	96.4286		97	3	97		100	1	99.0099
	galactose	0	0	100	0		0	100	0		0	100	0
		1	14	86	14		15	95	13.6364		16	84	16
		4	102	24	80.9524		109	19	85.1562		87	18	82.8571

## Sheet: 3-S3C,D,H and I
Numerical source data for Figure 3-figure supplement 3H and I
media	siRNA	CCCP (h)	YES	NO	% YES		YES	NO	% YES		YES	NO	% YES
glucose	ctrl siRNA	0	0	100	0		0	100	0		0	100	0
		1	58	55	51.3274		48	59	44.8598		63	55	53.3898
		4	100	5	95.2381		113	7	94.1667		108	5	95.5752
	siMfn2	0	0	100	0		0	100	0		0	100	0
		1	88	16	84.6154		102	15	87.1795		99	10	90.8257
		4	99	2	98.0198		101	4	96.1905		103	1	99.0385
	siPACS2	0	0	100	0		0	100	0		0	100	0
		1	99	17	85.3448		99	22	81.8182		95	37	71.9697
		4	144	9	94.1176		94	7	93.0693		112	2	98.2456
	siStx17	0	0	100	0		0	100	0		0	100	0
		1	87	18	82.8571		88	18	83.0189		107	7	93.8596
		4	99	6	94.2857		98	4	96.0784		110	0	100
galactose	ctrl siRNA	0	0	100	0		0	100	0		0	100	0
		1	8	95	7.76699		6	100	5.66038		3	108	2.7027
		4	117	17	87.3134		126	17	88.1119		88	31	73.9496
	siMfn2	0	0	100	0		0	100	0		0	100	0
		1	60	41	59.4059		57	60	48.7179		23	78	22.7723
		4	113	8	93.3884		101	4	96.1905		86	19	81.9048
	siPACS2	0	0	100	0		0	100	0		0	100	0
		1	55	87	38.7324		34	74	31.4815		46	78	37.0968
		4	114	8	93.4426		106	2	98.1481		109	6	94.7826
	siStx17	0	0	100	0		0	100	0		0	100	0
		1	61	57	51.6949		67	53	55.8333		43	63	40.566
		4	90	12	88.2353		92	9	91.0891		95	14	87.156
Numerical source data for Figure 3-figure supplement 3C and D
media	siRNA	CCCP (h)	YES	NO	% YES		YES	NO	% YES		YES	NO	% YES
glucose	ctrl siRNA	0	0	100	0		0	100	0		0	100	0
		1	51	49	51		71	33	68.2692		90	35	72
		4	107	6	94.6903		117	6	95.122		113	10	91.8699
	siMfn1	0	0	100	0		0	100	0		0	100	0
		1	62	38	62		70	35	66.6667		80	43	65.0407
		4	120	7	94.4882		152	8	95		109	8	93.1624
	siMfn2	0	0	100	0		9	98	8.41121		9	107	7.75862
		1	97	17	85.0877		93	20	82.3009		113	11	91.129
		4	121	0	100		105	4	96.3303		101	8	92.6606
	siMfn1+2	0	0	100	0		0	100	0		0	100	0
		1	86	19	81.9048		92	8	92		82	24	77.3585
		4	108	3	97.2973		101	4	96.1905		102	3	97.1429
glucose	ctrl siRNA	0	0	100	0		0	100	0		0	100	0
		1	5	99	4.80769		14	102	12.069		42	104	28.7671
		4	95	8	92.233		121	16	88.3212		98	18	84.4828
	siMfn1	0	0	100	0		0	100	0		0	100	0
		1	13	117	10		13	93	12.2642		17	115	12.8788
		4	96	13	88.0734		114	9	92.6829		108	10	91.5254
	siMfn2	0	0	100	0		0	100	0		0	100	0
		1	70	39	64.2202		88	32	73.3333		73	32	69.5238
		4	133	6	95.6835		108	7	93.913		123	7	94.6154
	siMfn1+2	0	0	100	0		0	100	0		0	100	0
		1	70	37	65.4206		49	65	42.9825		58	50	53.7037
		4	100	13	88.4956		103	10	91.1504		88	18	83.0189

## Sheet: 3-S4F
Numerical source data for Figure 3-figure supplement 4F
		recruitment?
cell line	CCCP (h)	YES	NO	% YES
WT	0	0	100	0
	1	38	70	35.1852
	4	62	58	51.6667
A4	0	0	100	0
	1	59	50	54.1284
	4	77	28	73.3333
A5	0	0	100	0
	1	63	43	59.434
	4	73	35	67.5926
B4	0	0	100	0
	1	45	74	37.8151
	4	60	43	58.2524
WT	0	0	100	0
	1	23	106	17.8295
	4	69	89	43.6709
A4	0	0	100	0
	1	50	67	42.735
	4	80	42	65.5738
A5	0	0	100	0
	1	45	76	37.1901
	4	72	44	62.069
B4	0	0	100	0
	1	19	105	15.3226
	4	45	89	33.5821
WT	0	0	100	0
	1	27	109	19.8529
	4	67	91	42.4051
A4	0	0	100	0
	1	47	66	41.5929
	4	72	37	66.055
A5	0	0	100	0
	1	43	81	34.6774
	4	69	40	63.3028
B4	0	0	100	0
	1	31	100	23.6641
	4	38	87	30.4

## Sheet: 3-S4H
Numerical source data for Figure 3-figure supplement 4H
	WT			A4			A5
DMSO	100	100	100	100	100	100	100	100	100
CCCP	49.2	58.1	48.2	7.9	11.9	13.2	11.8	19.1	21.7
CCCP (untransfected)	100	100	100	100	100	100	100	100	100

## Sheet: 3-S5C
Numerical source data for Figure 3-figure supplement 5C
	untreated			CCCP
WT + ctrl siRNA	0	0	0	46.72	45.04	37.62
WT + siPINK1	0	0	0	4.38	4.31	2.21
KO + ctrl siRNA	0	0	0	61.94	58.59	61.34
KO + siPINK1	0	0	0	2.96	5.37	2.9
Numerical source data for Figure 3-figure supplement 5D
	control			+ siPINK1
glu:ctrl siRNA	53.16	49.04	48.28	4.72	1.94	0
glu:siMfn2	68.5	54.72	65.74	0.88	0	0
gal:ctrl siRNA	5.22	3.91	3.68	0	0	0
gal:siMfn2	43.17	60.12	63.36	0	0	0
Numerical source data for Figure 3-figure supplement 5G
time (h)	WT + ctrl siRNA			WT + siMfn2			A320R + ctrl siRNA			A320R + siMfn2
0	0	0	0	0	0	0	0	0	0	0	0	0
1	57.94	64.49	61.97	93.16	84.55	83.25	0	0	0	0	0	0
2	94.07	93.28	94.64	97.89	97.2	95.12	0	0	0	0	0	0
4	98.25	100	98.47	98.2	96.15	99.59	1.83	0.65	1.07	0.56	1.54	0.92
8							10.53	7.69	14.29	8.55	5.93	5.88
