# Supplementary material for: Mfn2 ubiquitination by PINK1/parkin gates the p97-dependent release of ER from mitochondria to drive mitophagy
Source: eLife. 2018 Apr 20;7:e32866. doi: 10.7554/eLife.32866 (PMC5927771; doi:10.7554/eLife.32866)
Supplement: Figure 4—source data 1. [file elife-32866-fig4-data1.xlsx]

## Sheet: 4C,F,G and K
Numerical source data for Figure 4C
	WT + pcDNA			WT + Mfn2			WT + Mfn1-HA			C431S + pcDNA
DMSO	0	0	0	0	0	0	0	0	0	0	0	0
CCCP	67.31	66.07	67.92	36.47	36.54	34.78	57.81	64.86	62.5	6.45	2.86	5.56
Numerical source data for Figure 4F
WT	K406R	K416R	K420R	HR1	HR2	TS/AA	WT (C431S)
76.72	28.9	43.7	47.41	10.96	29.52	65.08	7.68
41.83	23.98	69.93	68.13	19.18	70.87	45.45	-6.15
41.79	34.24	79.14	62.61	18.31	32.26	26.03	-3.57
96.03	61.7	74.03	65.26	13.34	46.18	39.22	23.6
Numerical source data for Figure 4G
WT	K406R	K416R	K420R	HR1	HR2	TS/AA
100	55.68	38.79	61.02	117.44	91.11	80.96
100	152.53	115.95	93.09	112.94	82.26	160.84
100	110.18	43.21	92.15	193.18	155.05	170.17
100	124.51	103.01	114.17	142.74	137.34	218.03
Numerical source data for Figure 4K
WT	HR1	HR2	TS/AA
20.75	62.5	34.92	36.92
22.92	65.15	29.09	35.59
35.56	76.12	43.75	30.77
34.33	64.52	26.87	36.36
