# Supplementary material for: Mfn2 ubiquitination by PINK1/parkin gates the p97-dependent release of ER from mitochondria to drive mitophagy
Source: eLife. 2018 Apr 20;7:e32866. doi: 10.7554/eLife.32866 (PMC5927771; doi:10.7554/eLife.32866)
Supplement: Figure 5—source data 1. [file elife-32866-fig5-data1.xlsx]

## Sheet: 5G and H
Numerical source data for Figure 5G and H
block 1
image file	mito	location	P(mito)	L(ER-mito)	% app	contact?	% contact	real P(mito)	real L(ER-mito)
block 1 image 1	1	1	3.428	0.775	22.6079	1	1	3.89545	0.880682		block 1 = control - CCCP
	2	2	2.031	0.743	36.583	1		2.30795	0.844318		block 2 = NMS - CCCP
	3	3	3.419	1.099	32.1439	1		3.88523	1.24886		block 5 = control + CCCP
	4	4	1.617	0.443	27.3964	1		1.8375	0.503409		block 6 = NMS + CCCP
	5	5	1.68	0.302	17.9762	1		1.90909	0.343182
	6	6	1.55	0.454	29.2903	1		1.76136	0.515909		500 nm = 0.44
	7	7	1.257	0.431	34.288	1		1.42841	0.489773
	8	8	2.426	0.323	13.3141	1		2.75682	0.367045
	9	9	1.554	0.149	9.58816	1		1.76591	0.169318
	10	10	2.237	0.893	39.9195	1		2.54205	1.01477
	11	11	1.043	0.8	76.7018	1		1.18523	0.909091
	12	12	1.041	0.665	63.8809	1		1.18295	0.755682
	13	13	3.273	0.472	14.421	1		3.71932	0.536364
block 1 image 10	14	1	4.438	0.677	15.2546	1	0.777778	5.04318	0.769318
	15	2	1.768	0	0	0		2.00909	0
	16	3	2.484	0	0	0		2.82273	0
	17	4	2.017	0.349	17.3029	1		2.29205	0.396591
	18	5	2.214	0.905	40.8762	1		2.51591	1.02841
	19	6	3.638	1.643	45.1622	1		4.13409	1.86705
	20	7	1.802	0.238	13.2075	1		2.04773	0.270455
	21	8	1.977	0.48	24.2792	1		2.24659	0.545455
	22	9	4.462	1.314	29.4487	1		5.07045	1.49318
block 1 image 11	23	1	1.535	0.366	23.8436	1	0.933333	1.74432	0.415909
	24	2	2.389	0.3	12.5576	1		2.71477	0.340909
	25	3	1.407	0.202	14.3568	1		1.59886	0.229545
	26	4	1.722	0.856	49.7096	1		1.95682	0.972727
	27	5	3.078	0.434	14.1001	1		3.49773	0.493182
	28	6	7.367	0.62	8.41591	1		8.37159	0.704545
	29	7	1.616	0.261	16.151	1		1.83636	0.296591
	30	8	1.263	0	0	0		1.43523	0
	31	9	1.33	0.729	54.812	1		1.51136	0.828409
	32	10	2.918	0.386	13.2282	1		3.31591	0.438636
	33	11	2.454	0.171	6.96822	1		2.78864	0.194318
	34	12	1.009	0.46	45.5897	1		1.14659	0.522727
	35	13	1.499	0.472	31.4877	1		1.70341	0.536364
	36	14	6.526	1.399	21.4373	1		7.41591	1.58977
	37	15	1.723	0.919	53.3372	1		1.95795	1.04432
block 1 image 12	38	1	3.27	0.665	20.3364	1	0.833333	3.71591	0.755682
	39	2	6.198	1.898	30.6228	1		7.04318	2.15682
	40	3	7.558	1.799	23.8026	1		8.58864	2.04432
	41	4	1.657	0.31	18.7085	1		1.88295	0.352273
	42	5	2.742	0.567	20.6783	1		3.11591	0.644318
	43	6	1.351	0	0	0		1.53523	0
block 1 image 13	44	1	3.436	2.196	63.9115	1	1	3.90455	2.49545
	45	2	5.456	0.98	17.9619	1		6.2	1.11364
	46	3	1.951	0.65	33.3162	1		2.21705	0.738636
	47	4	15.856	5.329	33.6087	1		18.0182	6.05568
	48	5	4.256	0.685	16.0949	1		4.83636	0.778409
block 1 image 2	49	1	1.786	0	0	0	0.75	2.02955	0
	50	2	1.701	0	0	0		1.93295	0
	51	3	6.232	4.002	64.2169	1		7.08182	4.54773
	52	4	2.565	0.945	36.8421	1		2.91477	1.07386
	53	5	5.547	1.024	18.4604	1		6.30341	1.16364
	54	6	1.034	0.399	38.588	1		1.175	0.453409
	55	7	1.755	0.804	45.812	1		1.99432	0.913636
	56	8	1.977	1.008	50.9863	1		2.24659	1.14545
block 1 image 3	57	1	3.129	0.607	19.3992	1	1	3.55568	0.689773
	58	2	1.31	0.539	41.145	1		1.48864	0.6125
	59	3	1.429	0.402	28.1316	1		1.62386	0.456818
	60	4	1.603	0.546	34.0611	1		1.82159	0.620455
	61	5	1.879	0.722	38.4247	1		2.13523	0.820455
	62	6	3.818	1.165	30.5134	1		4.33864	1.32386
	63	7	3.114	0.393	12.6204	1		3.53864	0.446591
	64	8	3.977	1.873	47.0958	1		4.51932	2.12841
block 1 image 4	65	1	2.634	0.142	5.39104	1	0.888889	2.99318	0.161364
	66	2	1.538	0	0	0		1.74773	0
	67	3	2.08	0.848	40.7692	1		2.36364	0.963636
	68	4	2.417	0.586	24.2449	1		2.74659	0.665909
	69	5	1.721	0.291	16.9088	1		1.95568	0.330682
	70	6	2.071	1.097	52.9696	1		2.35341	1.24659
	71	7	1.416	0.988	69.774	1		1.60909	1.12273
	72	8	2.569	1.276	49.6691	1		2.91932	1.45
	73	9	2.846	1.455	51.1244	1		3.23409	1.65341
block 1 image 5	74	1	5.11	0.624	12.2114	1	1	5.80682	0.709091
	75	2	28.599	5.668	19.8189	1		32.4989	6.44091
	76	3	3.088	0.556	18.0052	1		3.50909	0.631818
	77	4	2.201	0.583	26.488	1		2.50114	0.6625
	78	5	2.343	0.184	7.85318	1		2.6625	0.209091
block 1 image 6	79	1	15.25	3.542	23.2262	1	1	17.3295	4.025
	80	2	2.778	0.702	25.27	1		3.15682	0.797727
	81	3	2.546	0.929	36.4886	1		2.89318	1.05568
	82	4	4.382	1.64	37.4258	1		4.97955	1.86364
	83	5	1.833	0.252	13.748	1		2.08295	0.286364
	84	6	3.753	0.649	17.2928	1		4.26477	0.7375
	85	7	1.312	0.506	38.5671	1		1.49091	0.575
	86	8	4.845	1.244	25.676	1		5.50568	1.41364
	87	9	2.844	0.872	30.661	1		3.23182	0.990909
	88	10	8.16	3.266	40.0245	1		9.27273	3.71136
	89	11	8.124	1.28	15.7558	1		9.23182	1.45455
block 1 image 7	90	1	1.728	0.573	33.1597	1	1	1.96364	0.651136
	91	2	1.519	0.225	14.8124	1		1.72614	0.255682
	92	3	9.337	2.819	30.1917	1		10.6102	3.20341
	93	4	1.759	0.511	29.0506	1		1.99886	0.580682
	94	5	4.342	1.126	25.9327	1		4.93409	1.27955
	95	6	7.305	2.307	31.5811	1		8.30114	2.62159
	96	7	6.837	1.952	28.5505	1		7.76932	2.21818
block 1 image 8	97	1	7.515	2.263	30.1131	1	1	8.53977	2.57159
	98	2	3.066	1.757	57.3059	1		3.48409	1.99659
	99	3	2.633	1.444	54.8424	1		2.99205	1.64091
	100	4	3.391	0.76	22.4123	1		3.85341	0.863636
	101	5	1.461	0.476	32.5804	1		1.66023	0.540909
	102	6	3.697	1.291	34.9202	1		4.20114	1.46705
	103	7	3.212	0.72	22.4159	1		3.65	0.818182
	104	8	2.29	1.129	49.3013	1		2.60227	1.28295
	105	9	3.699	1.761	47.6075	1		4.20341	2.00114
	106	10	1.72	0.812	47.2093	1		1.95455	0.922727
	107	11	3.908	1.758	44.9846	1		4.44091	1.99773
	108	12	7.745	2.148	27.734	1		8.80114	2.44091
block 1 image 9	109	1	7.065	0.464	6.56759	1	1	8.02841	0.527273
	110	2	4.53	1.105	24.3929	1		5.14773	1.25568
	111	3	8.357	2.715	32.4877	1		9.49659	3.08523
	112	4	4.25	1.497	35.2235	1		4.82955	1.70114
	113	5	1.467	0.446	30.4022	1		1.66705	0.506818
		XBAR	3.58471	0.986522	28.7444		0.937179	4.07353	1.12105
		SIGMA	3.48201	0.966833	16.4725		0.093607	3.95683	1.09867
block 5
image file	mito	location	P(mito)	L(ER-mito)	% app	contact?	% contact	real P(mito)	real L(ER-mito)
block 5 image 1	1	1	1.622	0.705	43.4649	1	0.6	1.84318	0.801136
	2	2	2.615	0.204	7.80115	1		2.97159	0.231818
	3	3	1.645	0	0	0		1.86932	0
	4	4	2.282	0.311	13.6284	1		2.59318	0.353409
	5	5	1.504	0.181	12.0346	1		1.70909	0.205682
	6	6	1.632	0.278	17.0343	1		1.85455	0.315909
	7	7	1.606	0	0	0		1.825	0
	8	8	1.737	0	0	0		1.97386	0
	9	9	0.983	0	0	0		1.11705	0
	10	10	1.617	0	0	0		1.8375	0
	11	11	2.368	0.473	19.9747	1		2.69091	0.5375
	12	12	1.738	0.107	6.1565	1		1.975	0.121591
	13	13	1.575	0.319	20.254	1		1.78977	0.3625
	14	14	1.2	0.15	12.5	1		1.36364	0.170455
	15	15	1.65	0	0	0		1.875	0
block 5 image 10	16	1	1.669	0.221	13.2415	1	0.666667	1.89659	0.251136
	17	2	1.843	0.499	27.0754	1		2.09432	0.567045
	18	3	1.314	0	0	0		1.49318	0
	19	4	2.112	0.334	15.8144	1		2.4	0.379545
	20	5	1.54	0.308	20	1		1.75	0.35
	21	6	1.224	0.39	31.8627	1		1.39091	0.443182
	22	7	1.103	0	0	0		1.25341	0
	23	8	0.812	0.142	17.4877	1		0.922727	0.161364
	24	9	1.156	0	0	0		1.31364	0
	25	10	1.045	0	0	0		1.1875	0
	26	11	1.841	0.18	9.77729	1		2.09205	0.204545
	27	12	1.344	0.12	8.92857	1		1.52727	0.136364
	28	13	1.4	0.163	11.6429	1		1.59091	0.185227
	29	14	0.836	0	0	0		0.95	0
	30	15	1.62	0.287	17.716	1		1.84091	0.326136
block 5 image 11	31	1	1.568	0.313	19.9617	1	0.772727	1.78182	0.355682
	32	2	1.699	0.679	39.9647	1		1.93068	0.771591
	33	3	0.891	0.106	11.8967	1		1.0125	0.120455
	34	4	1.262	0	0	0		1.43409	0
	35	5	0.89	0.108	12.1348	1		1.01136	0.122727
	36	6	2.438	0.971	39.8277	1		2.77045	1.10341
	37	7	1.017	0	0	0		1.15568	0
	38	8	0.882	0.073	8.27664	1		1.00227	0.0829545
	39	9	1.419	0.14	9.8661	1		1.6125	0.159091
	40	10	3.011	0.549	18.2331	1		3.42159	0.623864
	41	11	1.301	0.106	8.14758	1		1.47841	0.120455
	42	12	1.948	0.536	27.5154	1		2.21364	0.609091
	43	13	1.133	0	0	0		1.2875	0
	44	14	1.648	0	0	0		1.87273	0
	45	15	1.637	0.046	2.81002	1		1.86023	0.0522727
	46	16	1.32	0.157	11.8939	1		1.5	0.178409
	47	17	1.511	0	0	0		1.71705	0
	48	18	1.821	0	0	0		2.06932	0
	49	19	1.924	0	0	0		2.18636	0
	50	20	1.17	0	0	0		1.32955	0
	51	21	1.33	0.08	6.01504	1		1.51136	0.0909091
	52	22	1.318	0.117	8.87709	1		1.49773	0.132955
	53	23	1.608	0	0	0		1.82727	0
	54	24	1.608	0.171	10.6343	1		1.82727	0.194318
	55	25	1.31	0.236	18.0153	1		1.48864	0.268182
	56	26	1.616	0.055	3.40347	1		1.83636	0.0625
	57	27	1.908	0.106	5.55556	1		2.16818	0.120455
	58	28	1.235	0.189	15.3036	1		1.40341	0.214773
	59	29	1.417	0.306	21.5949	1		1.61023	0.347727
	60	30	1.479	0.141	9.53347	1		1.68068	0.160227
	61	31	1.181	0.108	9.14479	1		1.34205	0.122727
	62	32	1.443	0.046	3.1878	1		1.63977	0.0522727
	63	33	1.177	0.262	22.26	1		1.3375	0.297727
	64	34	1.182	0.101	8.54484	1		1.34318	0.114773
	65	35	1.127	0.098	8.69565	1		1.28068	0.111364
	66	36	1.588	0.139	8.75315	1		1.80455	0.157955
	67	37	1.177	0.184	15.633	1		1.3375	0.209091
	68	38	2.309	0.182	7.8822	1		2.62386	0.206818
	69	39	1.405	0.169	12.0285	1		1.59659	0.192045
	70	40	1.236	0	0	0		1.40455	0
	71	41	1.962	0.211	10.7543	1		2.22955	0.239773
	72	42	1.147	0.182	15.8675	1		1.30341	0.206818
	73	43	1.657	0.172	10.3802	1		1.88295	0.195455
	74	44	1.227	0.397	32.3553	1		1.39432	0.451136
block 5 image 12	75	1	1.981	0	0	0	0.2	2.25114	0
	76	2	1.678	0	0	0		1.90682	0
	77	3	1.564	0	0	0		1.77727	0
	78	4	1.943	0	0	0		2.20795	0
	79	5	3	0.194	6.46667	1		3.40909	0.220455
block 5 image 2	80	1	1.033	0.066	6.38916	1	0.833333	1.17386	0.075
	81	2	1.907	0	0	0		2.16705	0
	82	3	1.651	0.204	12.3561	1		1.87614	0.231818
	83	4	1.522	0.564	37.0565	1		1.72955	0.640909
	84	5	1.905	0.082	4.30446	1		2.16477	0.0931818
	85	6	1.303	0.213	16.3469	1		1.48068	0.242045
	86	7	1.134	0.097	8.55379	1		1.28864	0.110227
	87	8	2.526	0.299	11.8369	1		2.87045	0.339773
	88	9	2.819	0.435	15.431	1		3.20341	0.494318
	89	10	2.289	0	0	0		2.60114	0
	90	11	0.971	0	0	0		1.10341	0
	91	12	1.237	0.226	18.27	1		1.40568	0.256818
	92	13	1.734	0.637	36.7359	1		1.97045	0.723864
	93	14	1.547	0.43	27.7957	1		1.75795	0.488636
	94	15	1.879	0.187	9.9521	1		2.13523	0.2125
	95	16	1.843	0.648	35.1601	1		2.09432	0.736364
	96	17	1.585	0.108	6.81388	1		1.80114	0.122727
	97	18	1.351	0.209	15.47	1		1.53523	0.2375
block 5 image 3	98	1	1.281	0.161	12.5683	1	1	1.45568	0.182955
	99	2	2.165	0.912	42.1247	1		2.46023	1.03636
	100	3	1.323	0.64	48.3749	1		1.50341	0.727273
	101	4	1.287	0.096	7.45921	1		1.4625	0.109091
block 5 image 4	102	1	1.261	0.606	48.0571	1	0.9	1.43295	0.688636
	103	2	1.575	0	0	0		1.78977	0
	104	3	1.192	0.325	27.2651	1		1.35455	0.369318
	105	4	1.255	0.29	23.1076	1		1.42614	0.329545
	106	5	1.351	0.115	8.51221	1		1.53523	0.130682
	107	6	1.03	0.302	29.3204	1		1.17045	0.343182
	108	7	1.067	0.405	37.9569	1		1.2125	0.460227
	109	8	1.301	0.228	17.525	1		1.47841	0.259091
	110	9	1.415	0.238	16.8198	1		1.60795	0.270455
	111	10	1.291	0.625	48.4121	1		1.46705	0.710227
block 5 image 5	112	1	1.176	0.162	13.7755	1	0.823529	1.33636	0.184091
	113	2	1.619	0	0	0		1.83977	0
	114	3	1.117	0.318	28.4691	1		1.26932	0.361364
	115	4	1.283	0.102	7.95012	1		1.45795	0.115909
	116	5	1.084	0.059	5.4428	1		1.23182	0.0670455
	117	6	1.297	0.203	15.6515	1		1.47386	0.230682
	118	7	2.148	1.281	59.6369	1		2.44091	1.45568
	119	8	1.438	0	0	0		1.63409	0
	120	9	1.473	0.237	16.0896	1		1.67386	0.269318
	121	10	1.719	0.513	29.8429	1		1.95341	0.582955
	122	11	1.224	0.127	10.3758	1		1.39091	0.144318
	123	12	1.567	0.401	25.5903	1		1.78068	0.455682
	124	13	1.071	0.076	7.09617	1		1.21705	0.0863636
	125	14	1.31	0	0	0		1.48864	0
	126	15	1.699	0.132	7.76928	1		1.93068	0.15
	127	16	1.087	0.414	38.0865	1		1.23523	0.470455
	128	17	1.394	0.083	5.95409	1		1.58409	0.0943182
block 5 image 6	129	1	1.319	0.164	12.4337	1	0.833333	1.49886	0.186364
	130	2	1.286	0.25	19.4401	1		1.46136	0.284091
	131	3	1.55	0.642	41.4194	1		1.76136	0.729545
	132	4	4.598	0.416	9.04741	1		5.225	0.472727
	133	5	1.27	0.201	15.8268	1		1.44318	0.228409
	134	6	2.46	0	0	0		2.79545	0
	135	7	1.239	0.188	15.1735	1		1.40795	0.213636
	136	8	1.092	0	0	0		1.24091	0
	137	9	1.383	0.141	10.1952	1		1.57159	0.160227
	138	10	1.719	0.229	13.3217	1		1.95341	0.260227
	139	11	1.584	0.323	20.3914	1		1.8	0.367045
	140	12	1.516	0.226	14.9077	1		1.72273	0.256818
block 5 image 7	141	1	1.313	0	0	0	0.75	1.49205	0
	142	2	3.626	0.379	10.4523	1		4.12045	0.430682
	143	3	1.258	0.209	16.6137	1		1.42955	0.2375
	144	4	2.459	0.41	16.6734	1		2.79432	0.465909
block 5 image 8	145	1	1.656	0.243	14.6739	1	0.652174	1.88182	0.276136
	146	2	2.833	0.076	2.68267	1		3.21932	0.0863636
	147	3	2.797	0	0	0		3.17841	0
	148	4	1.627	0.064	3.93362	1		1.84886	0.0727273
	149	5	1.634	0	0	0		1.85682	0
	150	6	1.495	0.283	18.9298	1		1.69886	0.321591
	151	7	1.586	0.064	4.03531	1		1.80227	0.0727273
	152	8	1.678	0	0	0		1.90682	0
	153	9	2.214	0	0	0		2.51591	0
	154	10	1.442	0	0	0		1.63864	0
	155	11	1.216	0.088	7.23684	1		1.38182	0.1
	156	12	2.179	0.534	24.5067	1		2.47614	0.606818
	157	13	1.92	0.259	13.4896	1		2.18182	0.294318
	158	14	5.643	0.248	4.39483	1		6.4125	0.281818
	159	15	1.151	0	0	0		1.30795	0
	160	16	1.239	0.134	10.8152	1		1.40795	0.152273
	161	17	2.435	0.584	23.9836	1		2.76705	0.663636
	162	18	4.51	0.472	10.4656	1		5.125	0.536364
	163	19	1.853	0	0	0		2.10568	0
	164	20	1.725	0	0	0		1.96023	0
	165	21	2.821	0.099	3.50939	1		3.20568	0.1125
	166	22	1.606	0.083	5.16812	1		1.825	0.0943182
	167	23	1.556	0.282	18.1234	1		1.76818	0.320455
block 5 image 9	168	1	1.049	0.092	8.77026	1	1	1.19205	0.104545
	169	2	1.723	0.236	13.697	1		1.95795	0.268182
	170	3	1.685	0.541	32.1068	1		1.91477	0.614773
	171	4	1.058	0.34	32.1361	1		1.20227	0.386364
	172	5	1.173	0.39	33.2481	1		1.33295	0.443182
		XBAR	1.62702	0.205512	12.8565		0.752647	1.84889	0.233536
		SIGMA	0.647403	0.213934	12.4898		0.215057	0.735685	0.243107
block 6
image file	mito	location	P(mito)	L(ER-mito)	% app	contact?	% contact	real P(mito)	real L(ER-mito)
block 6 image 1	1	1	1.451	0	0	0	0.941176	1.64886	0
	2	2	1.814	0.356	19.6251	1		2.06136	0.404545
	3	3	1.495	0.189	12.6421	1		1.69886	0.214773
	4	4	1.723	0.202	11.7237	1		1.95795	0.229545
	5	5	3.441	2.336	67.8872	1		3.91023	2.65455
	6	6	1.33	0.423	31.8045	1		1.51136	0.480682
	7	7	1.944	0.127	6.53292	1		2.20909	0.144318
	8	8	2.273	1.446	63.6164	1		2.58295	1.64318
	9	9	1.403	0.779	55.5239	1		1.59432	0.885227
	10	10	2.018	0.294	14.5689	1		2.29318	0.334091
	11	11	1.367	0.345	25.2377	1		1.55341	0.392045
	12	12	1.565	0.596	38.0831	1		1.77841	0.677273
	13	13	1.419	0.163	11.487	1		1.6125	0.185227
	14	14	1.227	0.153	12.4694	1		1.39432	0.173864
	15	15	1.559	0.656	42.0783	1		1.77159	0.745455
	16	16	1.213	0.35	28.8541	1		1.37841	0.397727
	17	17	1.928	0.218	11.3071	1		2.19091	0.247727
block 6 image 10	18	1	1.997	1.417	70.9564	1	0.95	2.26932	1.61023
	19	2	1.258	1.137	90.3816	1		1.42955	1.29205
	20	3	1.115	0.305	27.3543	1		1.26705	0.346591
	21	4	1.583	0.932	58.8756	1		1.79886	1.05909
	22	5	1.598	0.427	26.7209	1		1.81591	0.485227
	23	6	1.684	0.55	32.6603	1		1.91364	0.625
	24	7	1.148	0	0	0		1.30455	0
	25	8	1.752	0.272	15.5251	1		1.99091	0.309091
	26	9	1.963	1.302	66.3271	1		2.23068	1.47955
	27	10	1.211	0.366	30.223	1		1.37614	0.415909
	28	11	1.364	0.368	26.9795	1		1.55	0.418182
	29	12	3.105	0.767	24.7021	1		3.52841	0.871591
	30	13	1.139	0.296	25.9877	1		1.29432	0.336364
	31	14	1.56	0.274	17.5641	1		1.77273	0.311364
	32	15	1.089	0.243	22.314	1		1.2375	0.276136
	33	16	1.38	0.807	58.4783	1		1.56818	0.917045
	34	17	1.74	0.284	16.3218	1		1.97727	0.322727
	35	18	4.911	1.875	38.1796	1		5.58068	2.13068
	36	19	0.905	0.237	26.1878	1		1.02841	0.269318
	37	20	2.264	0.934	41.2544	1		2.57273	1.06136
block 6 image 12	38	1	1.546	0.327	21.1514	1	0.904762	1.75682	0.371591
	39	2	2.417	1.004	41.5391	1		2.74659	1.14091
	40	3	1.62	0.188	11.6049	1		1.84091	0.213636
	41	4	1.439	0.382	26.5462	1		1.63523	0.434091
	42	5	1.304	0.176	13.4969	1		1.48182	0.2
	43	6	1.85	0	0	0		2.10227	0
	44	7	2.062	0.761	36.9059	1		2.34318	0.864773
	45	8	1.433	0	0	0		1.62841	0
	46	9	1.012	0.324	32.0158	1		1.15	0.368182
	47	10	0.844	0.101	11.9668	1		0.959091	0.114773
	48	11	2.483	0.48	19.3315	1		2.82159	0.545455
	49	12	1.08	0.233	21.5741	1		1.22727	0.264773
	50	13	1.382	0.232	16.7873	1		1.57045	0.263636
	51	14	2.443	0.339	13.8764	1		2.77614	0.385227
	52	15	1.054	0.232	22.0114	1		1.19773	0.263636
	53	16	0.914	0.231	25.2735	1		1.03864	0.2625
	54	17	0.521	0.246	47.2169	1		0.592045	0.279545
	55	18	1.15	0.297	25.8261	1		1.30682	0.3375
	56	19	0.974	0.153	15.7084	1		1.10682	0.173864
	57	20	1.552	0.403	25.9665	1		1.76364	0.457955
	58	21	1.81	0.407	22.4862	1		2.05682	0.4625
block 6 image 13	59	1	1.293	0	0	0	0.75	1.46932	0
	60	2	1.526	0.385	25.2294	1		1.73409	0.4375
	61	3	1.222	0.207	16.9394	1		1.38864	0.235227
	62	4	1.308	0	0	0		1.48636	0
	63	5	1.366	0.167	12.2255	1		1.55227	0.189773
	64	6	0.923	0.322	34.8862	1		1.04886	0.365909
	65	7	2.464	0.405	16.4367	1		2.8	0.460227
	66	8	1.125	0.119	10.5778	1		1.27841	0.135227
block 6 image 2	67	1	1.534	0.518	33.7679	1	0.954545	1.74318	0.588636
	68	2	1.74	0.543	31.2069	1		1.97727	0.617045
	69	3	2.462	0.403	16.3688	1		2.79773	0.457955
	70	4	1.481	0.259	17.4882	1		1.68295	0.294318
	71	5	1.447	0.579	40.0138	1		1.64432	0.657955
	72	6	1.265	0.115	9.09091	1		1.4375	0.130682
	73	7	1.132	0.265	23.4099	1		1.28636	0.301136
	74	8	1.946	0.277	14.2343	1		2.21136	0.314773
	75	9	1.175	0.722	61.4468	1		1.33523	0.820455
	76	10	1.493	0.41	27.4615	1		1.69659	0.465909
	77	11	1.317	0.469	35.6112	1		1.49659	0.532955
	78	12	0.95	0.736	77.4737	1		1.07955	0.836364
	79	13	0.909	0.266	29.2629	1		1.03295	0.302273
	80	14	1.232	0.213	17.289	1		1.4	0.242045
	81	15	1.295	0	0	0		1.47159	0
	82	16	1.384	0.384	27.7457	1		1.57273	0.436364
	83	17	1.022	0.386	37.7691	1		1.16136	0.438636
	84	18	2.153	0.937	43.5207	1		2.44659	1.06477
	85	19	1.185	0.696	58.7342	1		1.34659	0.790909
	86	20	1.665	0.466	27.988	1		1.89205	0.529545
	87	21	1.506	0.34	22.5764	1		1.71136	0.386364
	88	22	2.029	0.183	9.01922	1		2.30568	0.207955
block 6 image 3	89	1	1.269	0.27	21.2766	1	0.9	1.44205	0.306818
	90	2	2.379	1.173	49.3064	1		2.70341	1.33295
	91	3	2.002	0.414	20.6793	1		2.275	0.470455
	92	4	1.846	0.48	26.0022	1		2.09773	0.545455
	93	5	2.077	0.299	14.3958	1		2.36023	0.339773
	94	6	1.722	0.432	25.0871	1		1.95682	0.490909
	95	7	1.347	0.151	11.2101	1		1.53068	0.171591
	96	8	0.786	0	0	0		0.893182	0
	97	9	1.443	0.269	18.6417	1		1.63977	0.305682
	98	10	1.294	0.23	17.7743	1		1.47045	0.261364
	99	11	2.165	0.467	21.5704	1		2.46023	0.530682
	100	12	5.336	1.613	30.2286	1		6.06364	1.83295
	101	13	1.365	0.52	38.0952	1		1.55114	0.590909
	102	14	1.385	0.225	16.2455	1		1.57386	0.255682
	103	15	1.511	0.374	24.7518	1		1.71705	0.425
	104	16	2.398	0	0	0		2.725	0
	105	17	1.097	0.125	11.3947	1		1.24659	0.142045
	106	18	3.73	0.31	8.31099	1		4.23864	0.352273
	107	19	1.156	0.133	11.5052	1		1.31364	0.151136
	108	20	2.093	0.223	10.6546	1		2.37841	0.253409
block 6 image 4	109	1	2.199	0.64	29.1041	1	0.777778	2.49886	0.727273
	110	2	3.066	0.673	21.9504	1		3.48409	0.764773
	111	3	2.823	0.089	3.15267	1		3.20795	0.101136
	112	4	1.529	0.088	5.7554	1		1.7375	0.1
	113	5	2.369	0	0	0		2.69205	0
	114	6	0.967	0.078	8.06618	1		1.09886	0.0886364
	115	7	1.592	0	0	0		1.80909	0
	116	8	2.756	0.566	20.537	1		3.13182	0.643182
	117	9	2.487	0.334	13.4298	1		2.82614	0.379545
block 6 image 5	118	1	1.783	0.371	20.8076	1	0.75	2.02614	0.421591
	119	2	1.697	0.298	17.5604	1		1.92841	0.338636
	120	3	1.913	0.122	6.37742	1		2.17386	0.138636
	121	4	1.503	0	0	0		1.70795	0
	122	5	2.306	0.102	4.42324	1		2.62045	0.115909
	123	6	1.68	0.088	5.2381	1		1.90909	0.1
	124	7	1.528	0.303	19.8298	1		1.73636	0.344318
	125	8	1.278	0	0	0		1.45227	0
	126	9	0.968	0	0	0		1.1	0
	127	10	1.847	0.137	7.41743	1		2.09886	0.155682
	128	11	1.54	0.257	16.6883	1		1.75	0.292045
	129	12	0.954	0.193	20.2306	1		1.08409	0.219318
block 6 image 6	130	1	2.671	0.57	21.3403	1	0.818182	3.03523	0.647727
	131	2	1.488	0.367	24.664	1		1.69091	0.417045
	132	3	1.525	0.125	8.19672	1		1.73295	0.142045
	133	4	1.434	0.134	9.34449	1		1.62955	0.152273
	134	5	1.265	0.106	8.37945	1		1.4375	0.120455
	135	6	1.645	0.322	19.5745	1		1.86932	0.365909
	136	7	3.76	0	0	0		4.27273	0
	137	8	0.809	0.309	38.1953	1		0.919318	0.351136
	138	9	1.55	0	0	0		1.76136	0
	139	10	1.07	0.253	23.6449	1		1.21591	0.2875
	140	11	1.969	0.472	23.9716	1		2.2375	0.536364
	141	12	2.089	0.308	14.7439	1		2.37386	0.35
	142	13	2.504	0.364	14.5367	1		2.84545	0.413636
	143	14	0.88	0.49	55.6818	1		1	0.556818
	144	15	1.333	0.269	20.18	1		1.51477	0.305682
	145	16	1.533	0.404	26.3536	1		1.74205	0.459091
	146	17	1.091	0.117	10.7241	1		1.23977	0.132955
	147	18	1.151	0	0	0		1.30795	0
	148	19	1.225	0	0	0		1.39205	0
	149	20	1.137	0.137	12.0493	1		1.29205	0.155682
	150	21	1.835	0.405	22.0708	1		2.08523	0.460227
	151	22	1.784	0.106	5.9417	1		2.02727	0.120455
block 6 image 7	152	1	2.349	0.499	21.2431	1	0.894737	2.66932	0.567045
	153	2	2.244	0.306	13.6364	1		2.55	0.347727
	154	3	1.071	0.204	19.0476	1		1.21705	0.231818
	155	4	0.777	0.118	15.1866	1		0.882955	0.134091
	156	5	1.32	0.241	18.2576	1		1.5	0.273864
	157	6	1.539	0.468	30.4094	1		1.74886	0.531818
	158	7	1.201	0.211	17.5687	1		1.36477	0.239773
	159	8	1.481	0.366	24.713	1		1.68295	0.415909
	160	9	2.826	0.745	26.3623	1		3.21136	0.846591
	161	10	1.9	0.58	30.5263	1		2.15909	0.659091
	162	11	1.1	0.228	20.7273	1		1.25	0.259091
	163	12	1.201	0	0	0		1.36477	0
	164	13	1.031	0.789	76.5276	1		1.17159	0.896591
	165	14	1.679	0	0	0		1.90795	0
	166	15	1.937	0.189	9.75736	1		2.20114	0.214773
	167	16	1.053	0.275	26.1159	1		1.19659	0.3125
	168	17	1.939	0.261	13.4605	1		2.20341	0.296591
	169	18	1.302	0.142	10.9063	1		1.47955	0.161364
	170	19	1.459	0.382	26.1823	1		1.65795	0.434091
block 6 image 8	171	1	1.295	0.998	77.0656	1	1	1.47159	1.13409
	172	2	1.032	0.491	47.5775	1		1.17273	0.557955
	173	3	1.529	0.465	30.412	1		1.7375	0.528409
	174	4	1.418	0.59	41.6079	1		1.61136	0.670455
block 6 image 9	175	1	1.765	0.619	35.0708	1	0.846154	2.00568	0.703409
	176	2	1.351	0.363	26.869	1		1.53523	0.4125
	177	3	1.44	0.902	62.6389	1		1.63636	1.025
	178	4	0.786	0.617	78.4987	1		0.893182	0.701136
	179	5	1.105	0.225	20.362	1		1.25568	0.255682
	180	6	0.989	0.493	49.8483	1		1.12386	0.560227
	181	7	1.73	0.259	14.9711	1		1.96591	0.294318
	182	8	1.05	0	0	0		1.19318	0
	183	9	0.985	0	0	0		1.11932	0
	184	10	1.014	0.521	51.3807	1		1.15227	0.592045
	185	11	1.039	0.429	41.2897	1		1.18068	0.4875
	186	12	1.51	0.823	54.5033	1		1.71591	0.935227
	187	13	1.201	0.408	33.9717	1		1.36477	0.463636
		XBAR	1.61474	0.37554	23.655		0.873945	1.83494	0.42675
		SIGMA	0.662469	0.343822	18.3204		0.0845342	0.752805	0.390707
block 2
image file	mito	location	P(mito)	L(ER-mito)	% app	contact?	% contact	real P(mito)	real L(ER-mito)
block 2 image 1	1	1	4.528	1.346	29.7261	1	1	5.14545	1.52955
	2	2	4.772	2.366	49.5809	1		5.42273	2.68864
	3	3	1.852	1.216	65.6587	1		2.10455	1.38182
	4	4	5.26	2.91	55.3232	1		5.97727	3.30682
	5	5	1.031	0.452	43.8409	1		1.17159	0.513636
	6	6	1.365	0.549	40.2198	1		1.55114	0.623864
	7	7	2.866	0.507	17.6902	1		3.25682	0.576136
	8	8	1.67	0.576	34.491	1		1.89773	0.654545
	9	9	1.567	0.642	40.97	1		1.78068	0.729545
block 2 image 10	10	1	1.717	0.648	37.7402	1	1	1.95114	0.736364
	11	2	2.775	0.741	26.7027	1		3.15341	0.842045
	12	3	1.726	0.324	18.7717	1		1.96136	0.368182
	13	4	3.285	1.407	42.8311	1		3.73295	1.59886
	14	5	6.179	1.464	23.6932	1		7.02159	1.66364
	15	6	1.642	0.237	14.4336	1		1.86591	0.269318
	16	7	2.477	0.644	25.9992	1		2.81477	0.731818
	17	8	4.455	0.99	22.2222	1		5.0625	1.125
	18	9	1.367	0.252	18.4345	1		1.55341	0.286364
block 2 image 11	19	1	1.567	0.371	23.6758	1	1	1.78068	0.421591
	20	2	3.362	1.517	45.122	1		3.82045	1.72386
	21	3	4.977	2.256	45.3285	1		5.65568	2.56364
	22	4	1.145	0.693	60.524	1		1.30114	0.7875
	23	5	2.046	0.599	29.2766	1		2.325	0.680682
	24	6	4.306	0.192	4.45889	1		4.89318	0.218182
	25	7	1.842	0.094	5.10315	1		2.09318	0.106818
block 2 image 12	26	1	2.196	0.599	27.2769	1	0.8	2.49545	0.680682
	27	2	1.495	0.525	35.1171	1		1.69886	0.596591
	28	3	1.951	0.311	15.9405	1		2.21705	0.353409
	29	4	2.385	0	0	0		2.71023	0
	30	5	1.229	0.606	49.3084	1		1.39659	0.688636
block 2 image 13	31	1	1.301	0.152	11.6833	1	1	1.47841	0.172727
	32	2	3.998	1.9	47.5238	1		4.54318	2.15909
	33	3	2.738	0.229	8.36377	1		3.11136	0.260227
	34	4	1.41	0.278	19.7163	1		1.60227	0.315909
	35	5	1.434	0.325	22.6639	1		1.62955	0.369318
	36	6	1.563	0.595	38.0678	1		1.77614	0.676136
	37	7	5.959	0.699	11.7302	1		6.77159	0.794318
	38	8	1.597	0.338	21.1647	1		1.81477	0.384091
	39	9	4.722	0.585	12.3888	1		5.36591	0.664773
	40	10	1.799	0.445	24.736	1		2.04432	0.505682
block 2 image 14	41	1	5.679	1.383	24.3529	1	1	6.45341	1.57159
	42	2	1.919	0.341	17.7697	1		2.18068	0.3875
	43	3	3.187	1.075	33.7308	1		3.62159	1.22159
	44	4	1.386	0.235	16.9553	1		1.575	0.267045
	45	5	8.75	1.416	16.1829	1		9.94318	1.60909
	46	6	2.716	0.09	3.3137	1		3.08636	0.102273
block 2 image 2	47	1	1.222	0.248	20.2946	1	1	1.38864	0.281818
	48	2	3.014	0.979	32.4818	1		3.425	1.1125
	49	3	2.353	0.697	29.6218	1		2.67386	0.792045
block 2 image 3	50	1	1.985	0.275	13.8539	1	0.714286	2.25568	0.3125
	51	2	1.559	0.143	9.17255	1		1.77159	0.1625
	52	3	1.471	0	0	0		1.67159	0
	53	4	1.512	0.334	22.0899	1		1.71818	0.379545
	54	5	1.134	0.582	51.3228	1		1.28864	0.661364
	55	6	1.931	0	0	0		2.19432	0
	56	7	2.68	0.674	25.1493	1		3.04545	0.765909
block 2 image 4	57	1	4.396	1.91	43.4486	1	1	4.99545	2.17045
block 2 image 5	58	1	4.335	1.455	33.564	1	1	4.92614	1.65341
	59	2	2.955	1.605	54.3147	1		3.35795	1.82386
	60	3	4.187	0.667	15.9303	1		4.75795	0.757955
block 2 image 6	61	1	1.893	0.26	13.7348	1	1	2.15114	0.295455
	62	2	2.117	0.191	9.0222	1		2.40568	0.217045
	63	3	1.657	0.289	17.4412	1		1.88295	0.328409
	64	4	2.226	0.503	22.5966	1		2.52955	0.571591
	65	5	1.78	0.222	12.4719	1		2.02273	0.252273
	66	6	2.36	0.098	4.15254	1		2.68182	0.111364
	67	7	1.675	0.249	14.8657	1		1.90341	0.282955
	68	8	1.501	0.111	7.39507	1		1.70568	0.126136
	69	9	1.001	0.362	36.1638	1		1.1375	0.411364
	70	10	1.758	0.599	34.0728	1		1.99773	0.680682
	71	11	1.301	0.136	10.4535	1		1.47841	0.154545
	72	12	3.228	0.26	8.05452	1		3.66818	0.295455
	73	13	2.871	0.56	19.5054	1		3.2625	0.636364
block 2 image 7	74	1	1.655	0.318	19.2145	1	0.5	1.88068	0.361364
	75	2	2.103	0	0	0		2.38977	0
	76	3	2.874	0	0	0		3.26591	0
	77	4	3.415	0.608	17.8038	1		3.88068	0.690909
block 2 image 8	78	1	1.954	0.334	17.0931	1	0.9	2.22045	0.379545
	79	2	1.543	0.232	15.0356	1		1.75341	0.263636
	80	3	2.284	0.578	25.3065	1		2.59545	0.656818
	81	4	1.754	0	0	0		1.99318	0
	82	5	1.404	0.301	21.4387	1		1.59545	0.342045
	83	6	1.4	0.14	10	1		1.59091	0.159091
	84	7	1.686	0.12	7.11744	1		1.91591	0.136364
	85	8	1.268	0.23	18.1388	1		1.44091	0.261364
	86	9	1.627	0.121	7.437	1		1.84886	0.1375
	87	10	2.588	0.173	6.6847	1		2.94091	0.196591
block 2 image 9	88	1	1.629	0.542	33.2719	1	1	1.85114	0.615909
	89	2	3.566	1.972	55.3001	1		4.05227	2.24091
	90	3	1.431	0.225	15.7233	1		1.62614	0.255682
	91	4	2.175	0.791	36.3678	1		2.47159	0.898864
	92	5	1.722	0.328	19.0476	1		1.95682	0.372727
	93	6	2.175	0.847	38.9425	1		2.47159	0.9625
	94	7	1.453	0.744	51.2044	1		1.65114	0.845455
	95	8	4.997	1.281	25.6354	1		5.67841	1.45568
	96	9	3.64	1.536	42.1978	1		4.13636	1.74545
	97	10	1.507	0.196	13.006	1		1.7125	0.222727
	98	11	2.392	0.409	17.0987	1		2.71818	0.464773
	99	12	3.409	1.058	31.0355	1		3.87386	1.20227
		XBAR	2.4944	0.622354	24.0917	0.939394	0.922449	2.83455	0.70722
		SIGMA	1.37678	0.579148	15.4406	0.239821	0.15126	1.56453	0.658123
