# Supplementary material for: Mfn2 ubiquitination by PINK1/parkin gates the p97-dependent release of ER from mitochondria to drive mitophagy
Source: eLife. 2018 Apr 20;7:e32866. doi: 10.7554/eLife.32866 (PMC5927771; doi:10.7554/eLife.32866)
Supplement: Figure 6—source data 1. [file elife-32866-fig6-data1.xlsx]

## Sheet: 6I
Numerical source data for Figure 6I
	YFP-parkinWT + pcDNA			YFP-parkinWT + Mfn2WT			YFP-parkinWT + Mfn2HR1			YFP-parkinC431S + pcDNA
DMSO	0	0	0	0	0	0	0	0	0	0	0	0
CCCP	40.74	54.39	54.76	41.38	33.78	22.73	38.38	30.91	37.29	0	0	0
Numerical source data for Figure 6K
		n=1				n=2				n=3
		raw	no bg	relative		raw	no bg	relative		raw	no bg	relative
	no NMS-873	16359.5	12231.6	1		17402.1	910.523	1		89557.6	20213.9	1
	with NMS-873	89521.3	85393.4	6.98138		35216.8	18725.3	20.5654		190310	120966	5.98431
	background	4127.86				16491.6				69343.7
Numerical source data for Figure 6-figure supplement 1C
p97
GST	GST-4xUb	GST-4xpUb
0	77	0
0	236	0
0	222	4
p47
GST	GST-4xUb	GST-4xpUb
0	42	0
0	3	0
0	49	0
UBXN1
GST	GST-4xUb	GST-4xpUb
0	14	0
0	3	0
0	7	0
