# Supplementary material for: Mfn2 ubiquitination by PINK1/parkin gates the p97-dependent release of ER from mitochondria to drive mitophagy
Source: eLife. 2018 Apr 20;7:e32866. doi: 10.7554/eLife.32866 (PMC5927771; doi:10.7554/eLife.32866)
Supplement: Figure 7—source data 1. [file elife-32866-fig7-data1.xlsx]

## Sheet: 7B,D,E,F and H
Numerical source data for Figure 7B
ctrl siRNA	ctrl siRNA + NMS-873	siMfn2	siMfn2 + NMS-873
2.967	1.552	6.948	5.098
2.722	1.27	7.488	4.626
Numerical source data for Figure 7D
time (h)	ctrl siRNA:CCCP					ctrl siRNA:CCCP+NMS-873					siMfn2:CCCP					siMfn2:CCCP+NMS-873
0	100	100	100	100	100	100	100	100	100	100	100	100	100	100	100	100	100	100	100	100
2	83.275	80.989	53.334	96.783	88.624	89.988	89.83	99.954	136.576	76.618	110.527	77.267	70.145	78.359	67.708	76.034	85.858	68.718	67.047	60.364
4	32.006	47.992	44.73	73.434	77.129	57.09	61.82	58.772	108.57	50.034	36.7	56.782	69.39	35.189	44.717	36.12	54.912	49.069	51.754	31.355
6	13.004	36.509	18.523	58.362	55.72	48.387	45.798	50.502	87.776	85.223	9.344	39.275	33.272	12.98	33.854	7.615	28.365	31.02	25.643	14.784
Numerical source data for Figure 7E
ctrl siRNA	siMfn2
3.72093	0.814962
1.25443	0.722215
2.72645	0.932315
1.50399	1.97558
1.52949	0.436699
Numerical source data for Figure 7F
CCCP	CCCP+NMS-873	CCCP	CCCP+NMS-873
13.004	48.387	9.344	7.615
36.509	45.798	39.275	28.365
18.523	50.502	33.272	31.02
58.362	87.776	12.98	25.643
55.72	85.223	33.853	14.784
Numerical source data for Figure 7H
ctrl siRNA	siMfn1	siMfn2	siPACS2	siStx17
1.55271	1.84486	1.06442	1.0549	0.891836
1.36332	1.99748	0.534875	0.532027	0.553864
4.58507	3.32145	1.17135	0.933906	1.19882
