# Supplementary material for: Mfn2 ubiquitination by PINK1/parkin gates the p97-dependent release of ER from mitochondria to drive mitophagy
Source: eLife. 2018 Apr 20;7:e32866. doi: 10.7554/eLife.32866 (PMC5927771; doi:10.7554/eLife.32866)
Supplement: Figure 8—source data 1. [file elife-32866-fig8-data1.xlsx]

## Sheet: 8K
Numerical source data for Figure 8K
control	cytosol	cytosol+NMS-873
1	2.103	0.878
1	2.493	1.328
1	4.411	1.5
