# Supplementary material for: Mfn2 ubiquitination by PINK1/parkin gates the p97-dependent release of ER from mitochondria to drive mitophagy
Source: eLife. 2018 Apr 20;7:e32866. doi: 10.7554/eLife.32866 (PMC5927771; doi:10.7554/eLife.32866)
Supplement: Supplementary file 1. — Table depicting GST-4xUb interactors that are selective for S65-phosphorylated (top) or unphosphorylated (bottom) Ub. p97-related data (shaded in yellow) are also depicted in Figure 6—figure supplement 1C. [file elife-32866-supp1.xlsx]

## Sheet: 4xub,4xpub all,figure
4xpUb			No change	4xub
27			6	61	94
Gene	4xpUb Average	4xUb Average	4xpUb Ratio(%)	Total pep	P value	Accession Number	Molecular Weight	Fisher's Exact Test (P-Value)(p <= 0.1)	Quantitative Profile	150818-4xpUb	150629-4xpUb	150611-4xpUb	150818-4xUb	150629-4xUb	150611-4xUb	150818-GST	150629-GST	150611-GST
TBB2A	223	72.3333	75.5079	295.333	< 0.00010	Q7TMM9|TBB2A_MOUSE	50 kDa	< 0.00010	4xpub high, 4xub low	58	228	383	35	97	85	19	0	65
TBB2B	216.667	58	78.8835	274.667	< 0.00010	Q9CWF2|TBB2B_MOUSE	50 kDa	< 0.00010	4xpub high, 4xub low	55	220	375	0	91	83	0	0	0
TBB2C	204.667	65.3333	75.8025	270	< 0.00010	P68372|TBB2C_MOUSE	50 kDa	< 0.00010	4xpub high, 4xub low	54	209	351	28	91	77	15	0	61
TBB5	190.333	32.6667	85.3513	223	< 0.00010	P99024|TBB5_MOUSE	50 kDa	< 0.00010	4xpub high, 4xub low	52	194	325	29	0	69	0	0	56
TBB4	166.667	44.3333	78.9889	211	< 0.00010	Q9D6F9|TBB4_MOUSE	50 kDa	< 0.00010	4xpub high, 4xub low	38	171	291	0	74	59	0	0	48
TBB3	127	25.3333	83.3698	152.333	< 0.00010	Q9ERD7|TBB3_MOUSE	50 kDa	< 0.00010	4xpub high, 4xub low	34	139	208	21	0	55	0	0	39
TBA1B	54.3333	8.33333	86.7021	62.6667	< 0.00010	P05213|TBA1B_MOUSE	50 kDa	< 0.00010	4xpub high, 4xub low	0	58	105	0	0	25	0	0	24
TBA4A	44.3333	7.33333	85.8065	51.6667	< 0.00010	P68368|TBA4A_MOUSE	50 kDa	< 0.00010	4xpub high, 4xub low	4	42	87	6	0	16	0	0	16
ATPA	22.6667	6	79.0698	28.6667	< 0.00010	Q03265|ATPA_MOUSE	60 kDa	< 0.00010	4xpub high, 4xub low	12	8	48	8	1	9	4	0	10
NSF	16.6667	0.666667	96.1538	17.3333	< 0.00010	P46460|NSF_MOUSE	83 kDa	< 0.00010	4xpub high, 4xub low	0	6	44	0	0	2	0	0	4
ADT1	12.6667	2.66667	82.6087	15.3333	< 0.00010	P48962|ADT1_MOUSE	33 kDa	< 0.00010	4xpub high, 4xub low	0	1	37	0	1	7	0	0	6
ADT2	13	0.333333	97.5	13.3333	< 0.00010	P51881|ADT2_MOUSE	33 kDa	< 0.00010	4xpub high, 4xub low	0	5	34	0	1	0	0	0	0
GRPE1	9	1.66667	84.375	10.6667	< 0.00010	Q99LP6|GRPE1_MOUSE	24 kDa	< 0.00010	4xpub high, 4xub low	0	18	9	1	0	4	0	0	0
EFTU	8.66667	0.666667	92.8571	9.33333	< 0.00010	Q8BFR5|EFTU_MOUSE	50 kDa	< 0.00010	4xpub high, 4xub low	0	4	22	0	0	2	0	0	0
FA54B	9	0	100	9	< 0.00010	Q9CWE0|FA54B_MOUSE	32 kDa	< 0.00010	4xpub high, 4xub low	0	5	22	0	0	0	0	0	0
68MP	8	1	88.8889	9	< 0.00010	P56379|68MP_MOUSE	7 kDa	< 0.00010	4xpub high, 4xub low	1	7	16	0	0	3	0	0	0
SUCA	6.66667	0.666667	90.9091	7.33333	< 0.00010	Q9WUM5|SUCA_MOUSE	36 kDa	< 0.00010	4xpub high, 4xub low	2	3	15	1	0	1	0	0	2
Idh3b	7	0	100	7	< 0.00010	Q91VA7|Q91VA7_MOUSE	42 kDa	< 0.00010	4xpub high, 4xub low	0	1	20	0	0	0	0	0	0
MYH10	3.33333	1.33333	71.4286	4.66667	0.06	Q61879|MYH10_MOUSE	229 kDa	0.06	4xpub high, 4xub low	0	0	10	1	0	3	0	0	0
MA6D1	4.33333	0	100	4.33333	< 0.00010	Q14BB9|MA6D1_MOUSE	20 kDa	< 0.00010	4xpub high, 4xub low	3	1	9	0	0	0	0	0	0
HNRPM	3.33333	0	100	3.33333	0.00055	Q9D0E1-2|HNRPM_MOUSE	74 kDa	0.00055	4xpub high, 4xub low	0	0	10	0	0	0	0	0	0
NDUA4	3.33333	0	100	3.33333	0.00055	Q62425|NDUA4_MOUSE	9 kDa	0.00055	4xpub high, 4xub low	0	3	7	0	0	0	0	0	0
DNJB6	2.33333	0	100	2.33333	0.0052	O54946-2|DNJB6_MOUSE	27 kDa	0.0052	4xpub high, 4xub low	0	0	7	0	0	0	0	0	0
TPD54	2.33333	0	100	2.33333	0.0052	Q9CYZ2|TPD54_MOUSE	24 kDa	0.0052	4xpub high, 4xub low	0	0	7	0	0	0	0	0	0
KAD4	2.33333	0	100	2.33333	0.0052	Q9WUR9|KAD4_MOUSE	25 kDa	0.0052	4xpub high, 4xub low	0	0	7	0	0	0	0	0	0
RAC1	2	0.333333	85.7143	2.33333	0.046	P63001|RAC1_MOUSE	21 kDa	0.046	4xpub high, 4xub low	0	0	6	0	0	1	0	0	0
SUCB1	2	0	100	2	0.011	Q9Z2I9|SUCB1_MOUSE	50 kDa	0.011	4xpub high, 4xub low	0	0	6	0	0	0	0	0	0
HGS	4.33333	188.667	2.24525	193	< 0.00010	Q99LI8|HGS_MOUSE	86 kDa	< 0.00010	4xpub low, 4xub high	6	3	4	153	206	207	0	0	0
TERA	1.33333	178.333	0.742115	179.667	< 0.00010	Q01853|TERA_MOUSE	89 kDa	< 0.00010	4xpub low, 4xub high	0	0	4	77	236	222	0	0	0
TM1L2	0	154.333	0	154.333	< 0.00010	Q5SRX1-2|TM1L2_MOUSE	53 kDa	< 0.00010	4xpub low, 4xub high	0	0	0	112	218	133	0	0	1
UBP5	0.666667	148	0.44843	148.667	< 0.00010	P56399|UBP5_MOUSE	96 kDa	< 0.00010	4xpub low, 4xub high	0	0	2	66	185	193	0	0	0
TM1L2	0	78	0	78	< 0.00010	Q5SRX1|TM1L2_MOUSE	56 kDa	< 0.00010	4xpub low, 4xub high	0	0	0	106	0	128	0	0	0
STAM1	2.33333	59.3333	3.78378	61.6667	< 0.00010	P70297|STAM1_MOUSE	60 kDa	< 0.00010	4xpub low, 4xub high	1	0	6	49	50	79	0	0	0
TOM1	2	57	3.38983	59	< 0.00010	O88746|TOM1_MOUSE	54 kDa	< 0.00010	4xpub low, 4xub high	3	1	2	43	63	65	0	0	0
SQSTM	1.66667	51	3.16456	52.6667	< 0.00010	Q64337-2|SQSTM_MOUSE	44 kDa	< 0.00010	4xpub low, 4xub high	0	0	5	38	24	91	0	0	0
EPN1	0	41	0	41	< 0.00010	Q80VP1|EPN1_MOUSE	60 kDa	< 0.00010	4xpub low, 4xub high	0	0	0	33	31	59	1	0	0
EP15R	0.666667	35.3333	1.85185	36	< 0.00010	Q3UIS9|Q3UIS9_MOUSE	99 kDa	< 0.00010	4xpub low, 4xub high	1	0	1	38	11	57	5	0	1
NSF1C	0	31.3333	0	31.3333	< 0.00010	Q9CZ44-3|NSF1C_MOUSE	41 kDa	< 0.00010	4xpub low, 4xub high	0	0	0	42	3	49	0	0	0
WRIP1	0.333333	30	1.0989	30.3333	< 0.00010	Q91XU0|WRIP1_MOUSE	72 kDa	< 0.00010	4xpub low, 4xub high	0	0	1	23	24	43	0	0	0
TOLIP	0	29	0	29	< 0.00010	Q9QZ06|TOLIP_MOUSE	30 kDa	< 0.00010	4xpub low, 4xub high	0	0	0	26	30	31	0	0	0
Myo6	0	23.3333	0	23.3333	< 0.00010	E9Q3L1|E9Q3L1_MOUSE	146 kDa	< 0.00010	4xpub low, 4xub high	0	0	0	15	4	51	0	0	0
EPN2	0	21.6667	0	21.6667	< 0.00010	Q8CHU3-2|EPN2_MOUSE	62 kDa	< 0.00010	4xpub low, 4xub high	0	0	0	21	22	22	0	0	0
TAXB1	0	21.3333	0	21.3333	< 0.00010	Q3UKC1|TAXB1_MOUSE	94 kDa	< 0.00010	4xpub low, 4xub high	0	0	0	34	13	17	0	0	0
STAM2	0	19	0	19	< 0.00010	O88811|STAM2_MOUSE	57 kDa	< 0.00010	4xpub low, 4xub high	0	0	0	16	22	19	0	0	0
HUWE1	0.333333	17	1.92308	17.3333	< 0.00010	Q7TMY8|HUWE1_MOUSE	483 kDa	< 0.00010	4xpub low, 4xub high	0	0	1	38	4	9	0	0	0
F175B	0	16.6667	0	16.6667	< 0.00010	Q3TCJ1|F175B_MOUSE	47 kDa	< 0.00010	4xpub low, 4xub high	0	0	0	7	18	25	0	0	0
SERA	0	15	0	15	< 0.00010	Q61753|SERA_MOUSE	57 kDa	< 0.00010	4xpub low, 4xub high	0	0	0	14	4	27	0	0	0
HOIL1	0	13	0	13	< 0.00010	Q9WUB0|UB7I3_MOUSE	58 kDa	< 0.00010	4xpub low, 4xub high	0	0	0	13	13	13	0	0	0
Dnajb2	1.66667	9.33333	15.1515	11	0.00011	Q3TB24|Q3TB24_MOUSE	36 kDa	0.00011	4xpub low, 4xub high	0	0	5	4	5	19	0	0	0
EPS15	0.333333	8.66667	3.7037	9	< 0.00010	P42567|EPS15_MOUSE	98 kDa	< 0.00010	4xpub low, 4xub high	1	0	0	9	3	14	0	0	0
RNF31	0	8.66667	0	8.66667	< 0.00010	Q924T7|RNF31_MOUSE	119 kDa	< 0.00010	4xpub low, 4xub high	0	0	0	5	8	13	0	0	0
UBXN1	0	8	0	8	< 0.00010	Q922Y1|UBXN1_MOUSE	34 kDa	< 0.00010	4xpub low, 4xub high	0	0	0	14	3	7	0	0	0
Psmd2	0	7.66667	0	7.66667	< 0.00010	Q3TI61|Q3TI61_MOUSE	100 kDa	< 0.00010	4xpub low, 4xub high	0	0	0	1	3	19	0	0	0
PRS6A	0	7.33333	0	7.33333	< 0.00010	O88685|PRS6A_MOUSE	49 kDa	< 0.00010	4xpub low, 4xub high	0	0	0	4	5	13	0	0	0
PRS7	0	7.33333	0	7.33333	< 0.00010	P46471|PRS7_MOUSE	49 kDa	< 0.00010	4xpub low, 4xub high	0	0	0	1	5	16	0	0	0
UBP13	0	6.33333	0	6.33333	< 0.00010	D3YYG7|D3YYG7_MOUSE	97 kDa	< 0.00010	4xpub low, 4xub high	0	0	0	3	1	15	0	0	0
ZFN2B	0	5.66667	0	5.66667	< 0.00010	Q91X58|ZFN2B_MOUSE	28 kDa	< 0.00010	4xpub low, 4xub high	0	0	0	0	5	12	0	0	0
PA2G4	0.333333	5	6.25	5.33333	0.00055	P50580|PA2G4_MOUSE	44 kDa	0.00055	4xpub low, 4xub high	0	0	1	15	0	0	0	0	1
BRE	0	5.33333	0	5.33333	< 0.00010	Q8K3W0|BRE_MOUSE	44 kDa	< 0.00010	4xpub low, 4xub high	0	0	0	4	5	7	0	0	0
NIPS2	0	5.33333	0	5.33333	< 0.00010	O55126|NIPS2_MOUSE	33 kDa	< 0.00010	4xpub low, 4xub high	0	0	0	2	4	10	0	0	0
DP13A	0	5	0	5	< 0.00010	Q8K3H0|DP13A_MOUSE	79 kDa	< 0.00010	4xpub low, 4xub high	0	0	0	2	1	12	0	0	0
PSMD4	0	4.66667	0	4.66667	0.00013	O35226-2|PSMD4_MOUSE	41 kDa	0.00013	4xpub low, 4xub high	0	0	0	4	1	9	0	0	0
SHRPN	0	4.66667	0	4.66667	0.00013	Q91WA6|SHRPN_MOUSE	40 kDa	0.00013	4xpub low, 4xub high	0	0	0	2	5	7	0	0	0
N4BP1	0	4.33333	0	4.33333	0.00025	Q6A037|N4BP1_MOUSE	99 kDa	0.00025	4xpub low, 4xub high	0	0	0	1	6	6	0	0	0
AN13D	0	4.33333	0	4.33333	0.00025	Q6PD24|AN13D_MOUSE	58 kDa	0.00025	4xpub low, 4xub high	0	0	0	0	8	5	0	0	0
CUED1	0	4	0	4	0.00047	Q8R3V6|CUED1_MOUSE	43 kDa	0.00047	4xpub low, 4xub high	0	0	0	3	1	8	0	0	0
PSMD1	0	3.33333	0	3.33333	0.0017	Q3TXS7|PSMD1_MOUSE	106 kDa	0.0017	4xpub low, 4xub high	0	0	0	0	1	9	0	0	0
PSA1	0	3.33333	0	3.33333	0.0017	Q9R1P4|PSA1_MOUSE	30 kDa	0.0017	4xpub low, 4xub high	0	0	0	2	5	3	0	0	0
REPS1	0	3.33333	0	3.33333	0.0017	O54916-4|REPS1_MOUSE	81 kDa	0.0017	4xpub low, 4xub high	0	0	0	4	0	6	0	0	0
BCLF1	0	3.33333	0	3.33333	0.0017	Q8K019-2|BCLF1_MOUSE	106 kDa	0.0017	4xpub low, 4xub high	0	0	0	0	0	10	0	0	0
ITSN2	0	3.33333	0	3.33333	0.0017	Q9Z0R6|ITSN2_MOUSE	189 kDa	0.0017	4xpub low, 4xub high	0	0	0	0	0	10	0	0	0
AN13A	0.333333	2.33333	12.5	2.66667	0.049	Q80UP5|AN13A_MOUSE	67 kDa	0.049	4xpub low, 4xub high	0	0	1	2	0	5	0	0	0
Gsn	0.333333	2.33333	12.5	2.66667	0.049	Q3TGJ9|Q3TGJ9_MOUSE	81 kDa	0.049	4xpub low, 4xub high	1	0	0	3	0	4	0	0	0
UBFD1	0	2.66667	0	2.66667	0.006	Q78JW9|UBFD1_MOUSE	40 kDa	0.006	4xpub low, 4xub high	0	0	0	2	1	5	0	0	0
M3K7	0	2.66667	0	2.66667	0.006	Q62073|M3K7_MOUSE	64 kDa	0.006	4xpub low, 4xub high	0	0	0	4	2	2	0	0	0
PRS6B	0	2.66667	0	2.66667	0.006	P54775|PRS6B_MOUSE	47 kDa	0.006	4xpub low, 4xub high	0	0	0	0	2	6	0	0	0
BABA1	0	2.33333	0	2.33333	0.011	Q3UI43|BABA1_MOUSE	37 kDa	0.011	4xpub low, 4xub high	0	0	0	1	1	5	0	0	0
CC104	0	2	0	2	0.022	Q8C6E0|CC104_MOUSE	40 kDa	0.022	4xpub low, 4xub high	0	0	0	1	1	4	0	0	0
PSD7	0	2	0	2	0.022	P26516|PSD7_MOUSE	37 kDa	0.022	4xpub low, 4xub high	0	0	0	0	0	6	0	0	0
PRS4	0	2	0	2	0.022	P62192|PRS4_MOUSE	49 kDa	0.022	4xpub low, 4xub high	0	0	0	0	0	6	0	0	0
MYCBP	0	1.66667	0	1.66667	0.041	Q9EQS3|MYCBP_MOUSE	12 kDa	0.041	4xpub low, 4xub high	0	0	0	4	0	1	0	0	0
PLAP	0	1.66667	0	1.66667	0.041	P27612|PLAP_MOUSE	87 kDa	0.041	4xpub low, 4xub high	0	0	0	0	1	4	0	0	0
Gm15800	0	1.66667	0	1.66667	0.041	E9PX61|E9PX61_MOUSE	453 kDa	0.041	4xpub low, 4xub high	0	0	0	1	0	4	0	0	0
PSMD3	0	1.66667	0	1.66667	0.041	Q3TP95|Q3TP95_MOUSE	61 kDa	0.041	4xpub low, 4xub high	0	0	0	0	1	4	0	0	0
BRCC3	0	1.66667	0	1.66667	0.041	P46737|BRCC3_MOUSE	33 kDa	0.041	4xpub low, 4xub high	0	0	0	0	0	5	0	0	0
G3BP1	0	1.66667	0	1.66667	0.041	P97855|G3BP1_MOUSE	52 kDa	0.041	4xpub low, 4xub high	0	0	0	5	0	0	0	0	0
PSDE	0	1.33333	0	1.33333	0.078	O35593|PSDE_MOUSE	35 kDa	0.078	4xpub low, 4xub high	0	0	0	0	0	4	0	0	0
CBR1	4.33333	7	38.2353	11.3333	0.19	P48758|CBR1_MOUSE	31 kDa	0.19	[]	0	3	10	3	5	13	0	0	0
PABP1	1.66667	1	62.5	2.66667	0.3	P29341|PABP1_MOUSE	71 kDa	0.3	[]	4	0	1	3	0	0	0	0	0
MARE2	1.33333	0.666667	66.6667	2	0.29	Q8R001-2|MARE2_MOUSE	36 kDa	0.29	[]	0	0	4	0	0	2	0	0	0
MYH9	1	1	50	2	0.6	Q8VDD5|MYH9_MOUSE	226 kDa	0.6	[]	0	0	3	1	0	2	0	0	0
ATP5J	0.666667	1	40	1.66667	0.55	P97450|ATP5J_MOUSE	12 kDa	0.55	[]	2	0	0	3	0	0	0	0	0
