# Supplementary figures and images for: Mfn2 ubiquitination by PINK1/parkin gates the p97-dependent release of ER from mitochondria to drive mitophagy
Source: eLife journal article supplement (doi:10.7554/elife.32866), 2018-04-20

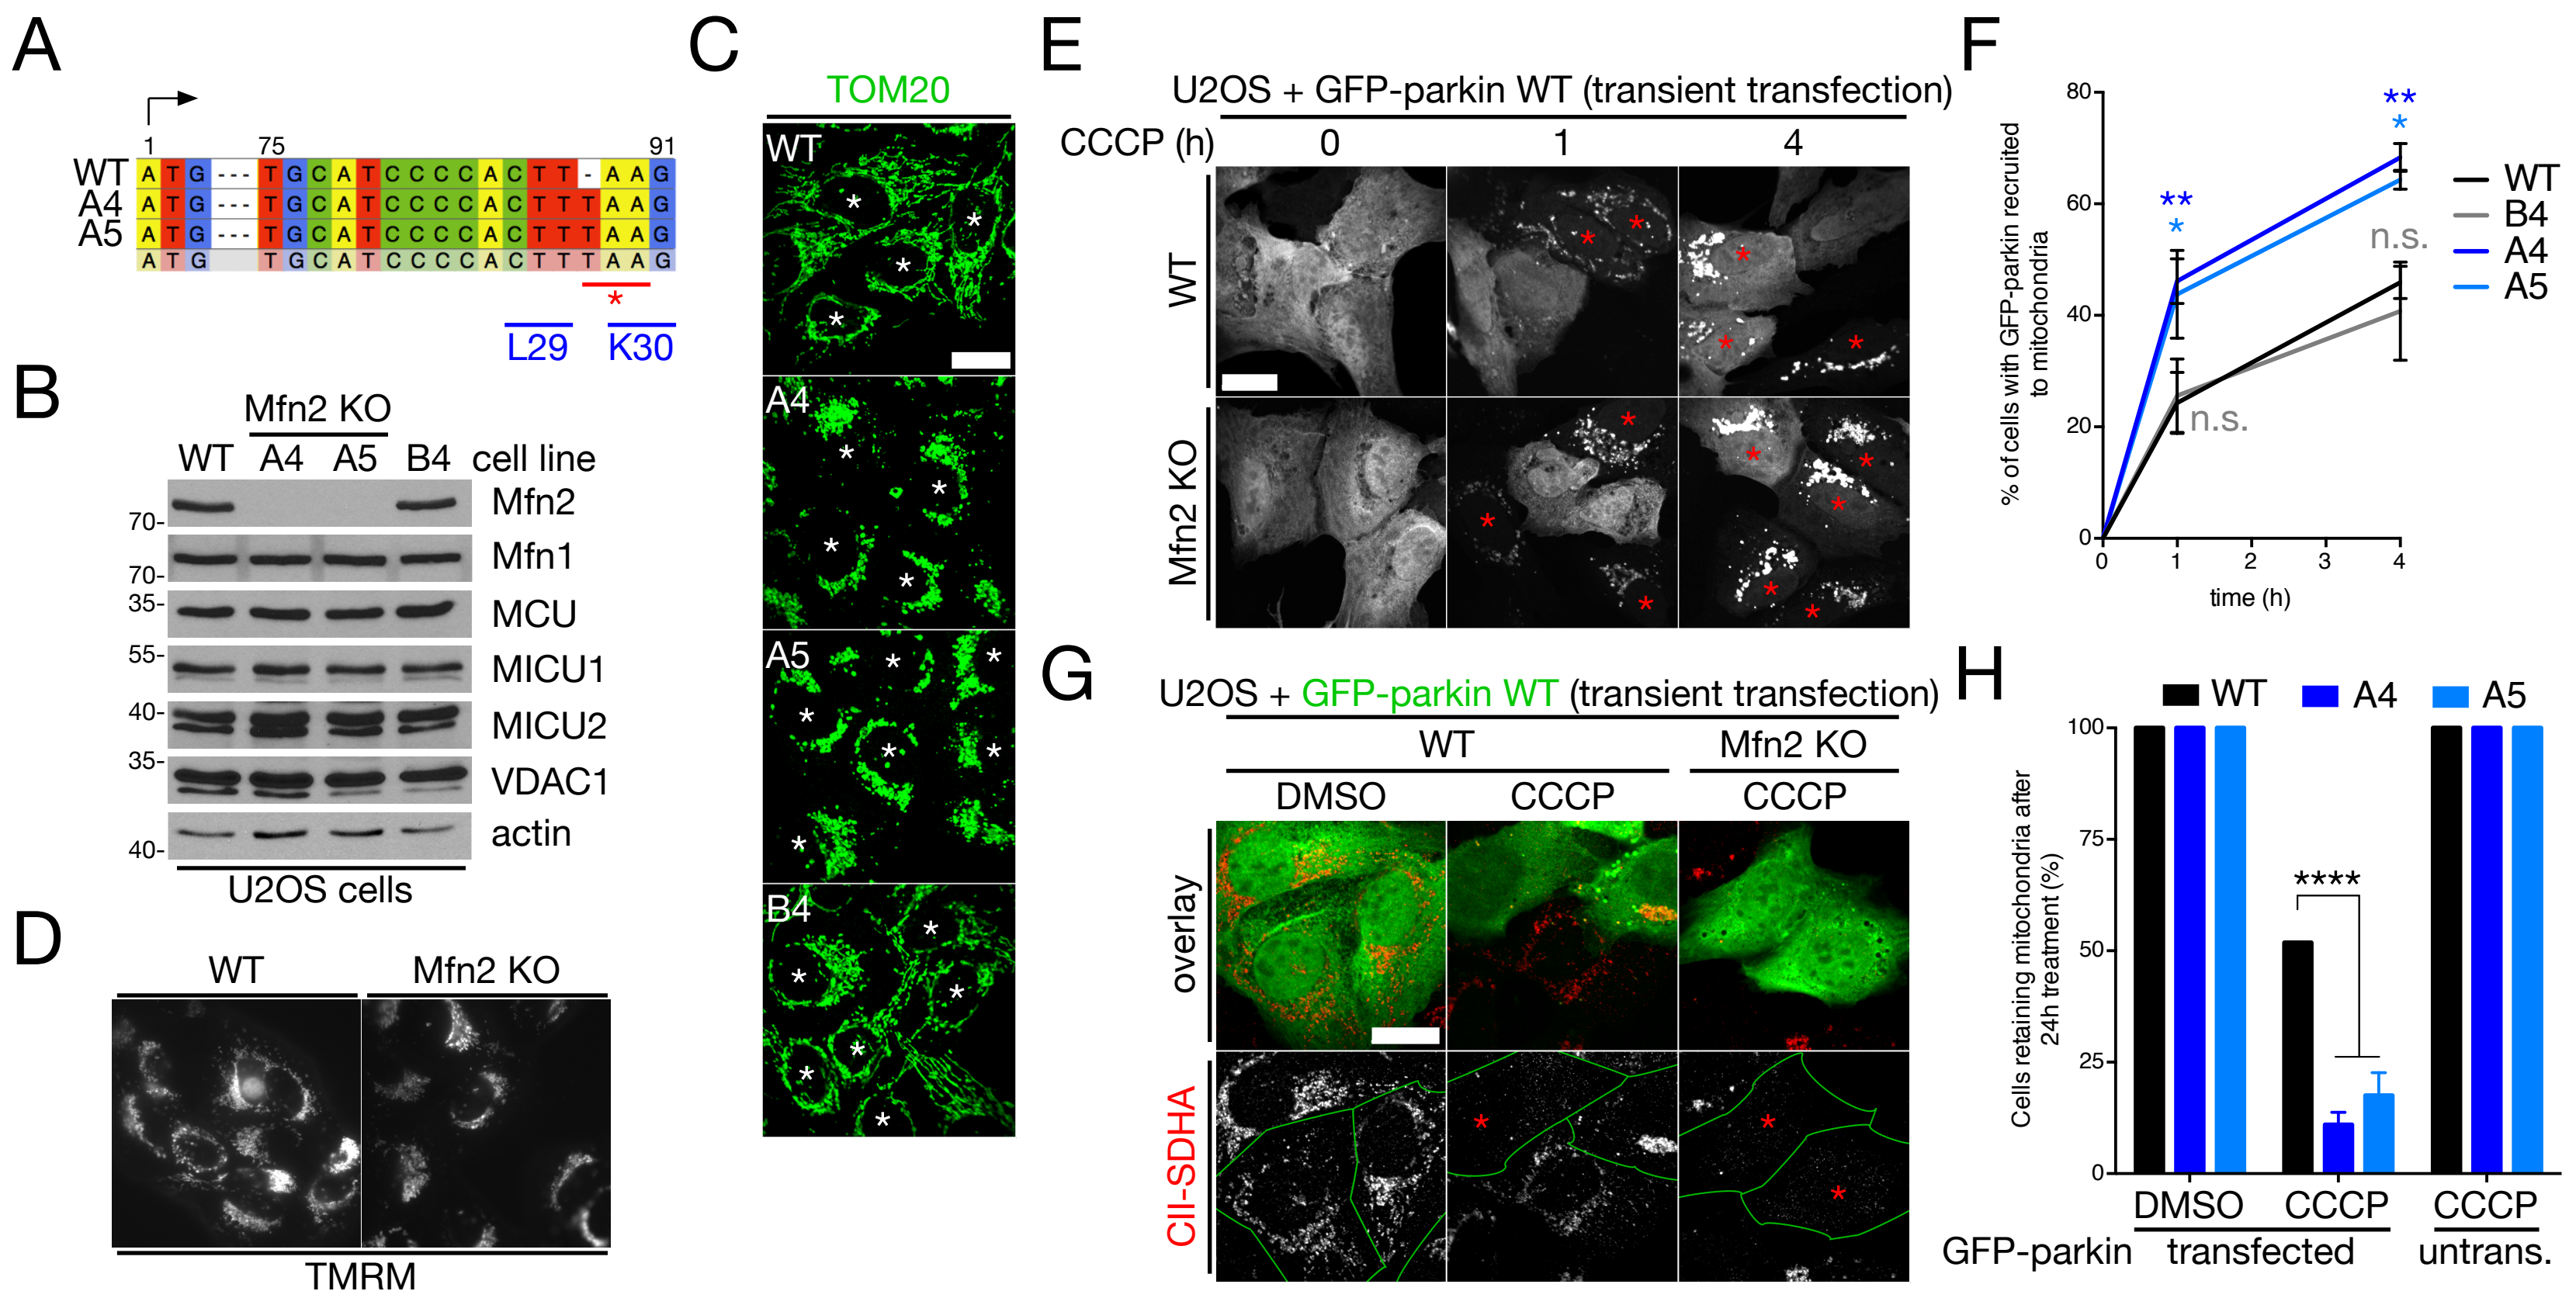

Supplement: supp [file elife-32866-supp-v1.zip]

**A**

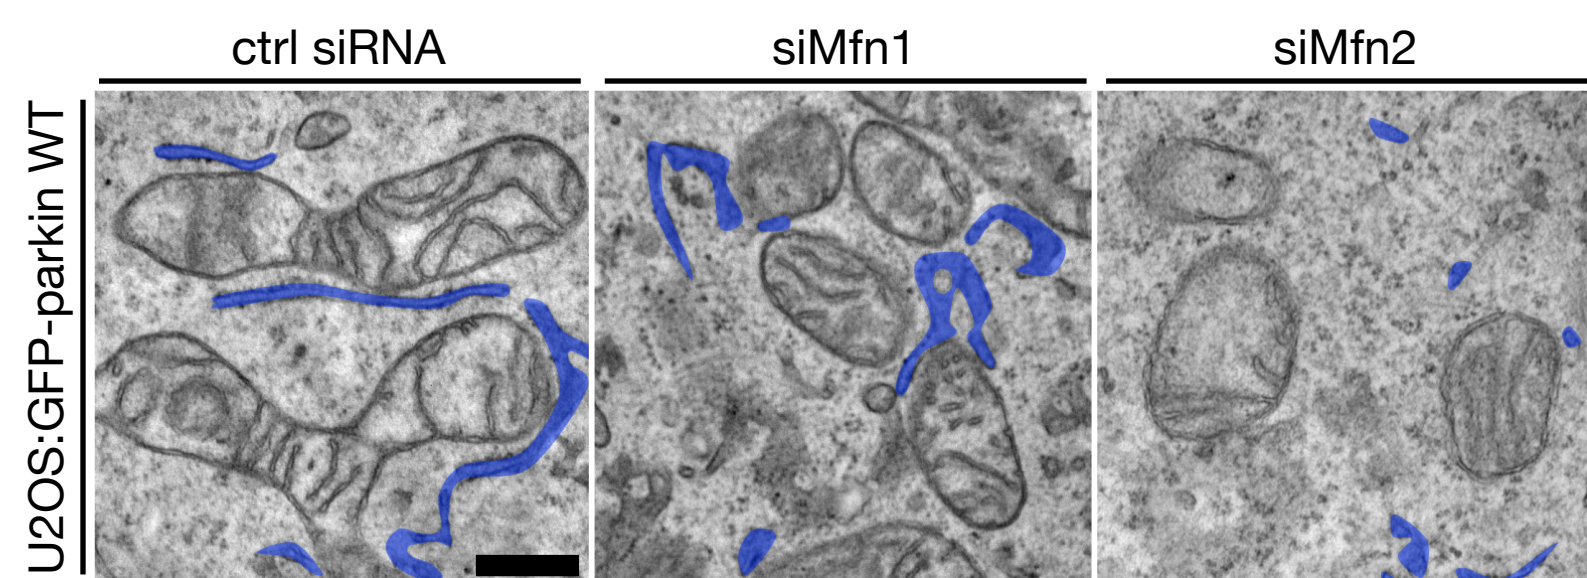

**B**

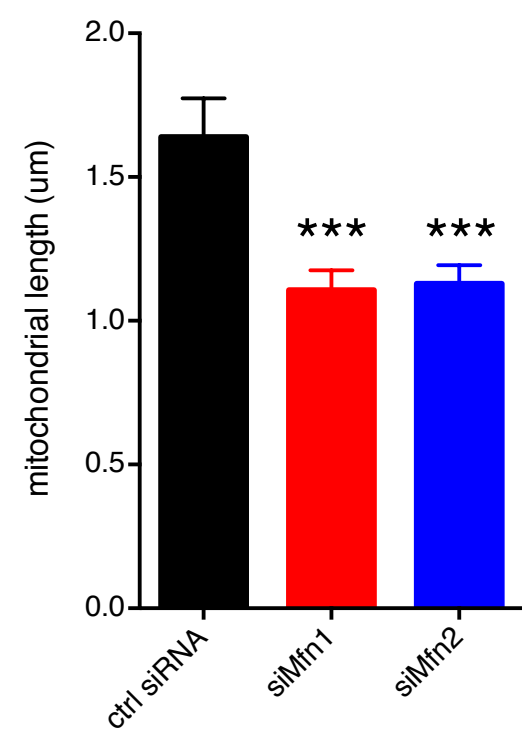

**C**

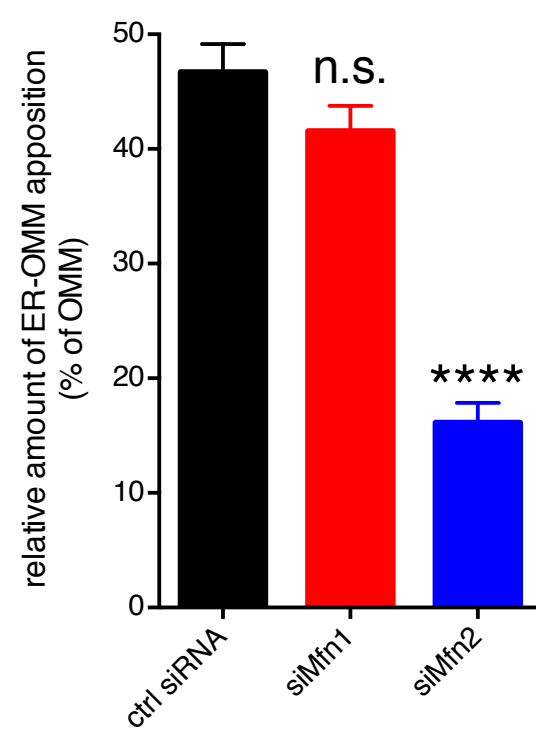

**D**

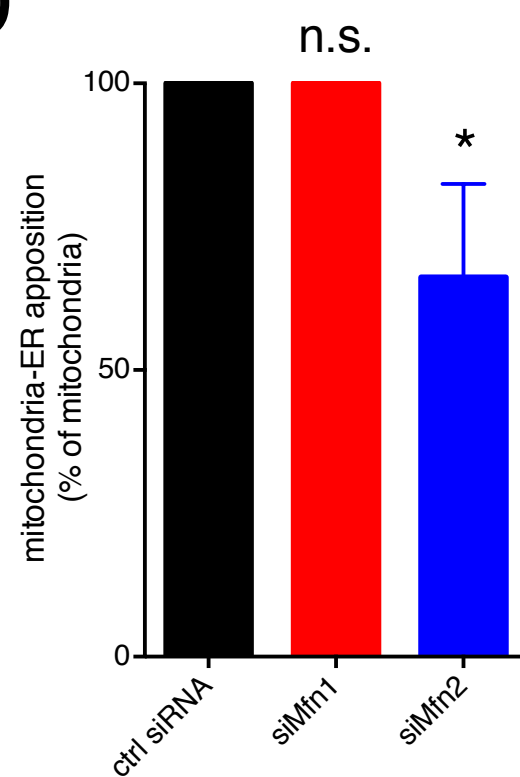

Supplement: supp [file elife-32866-supp-v1.zip]

A

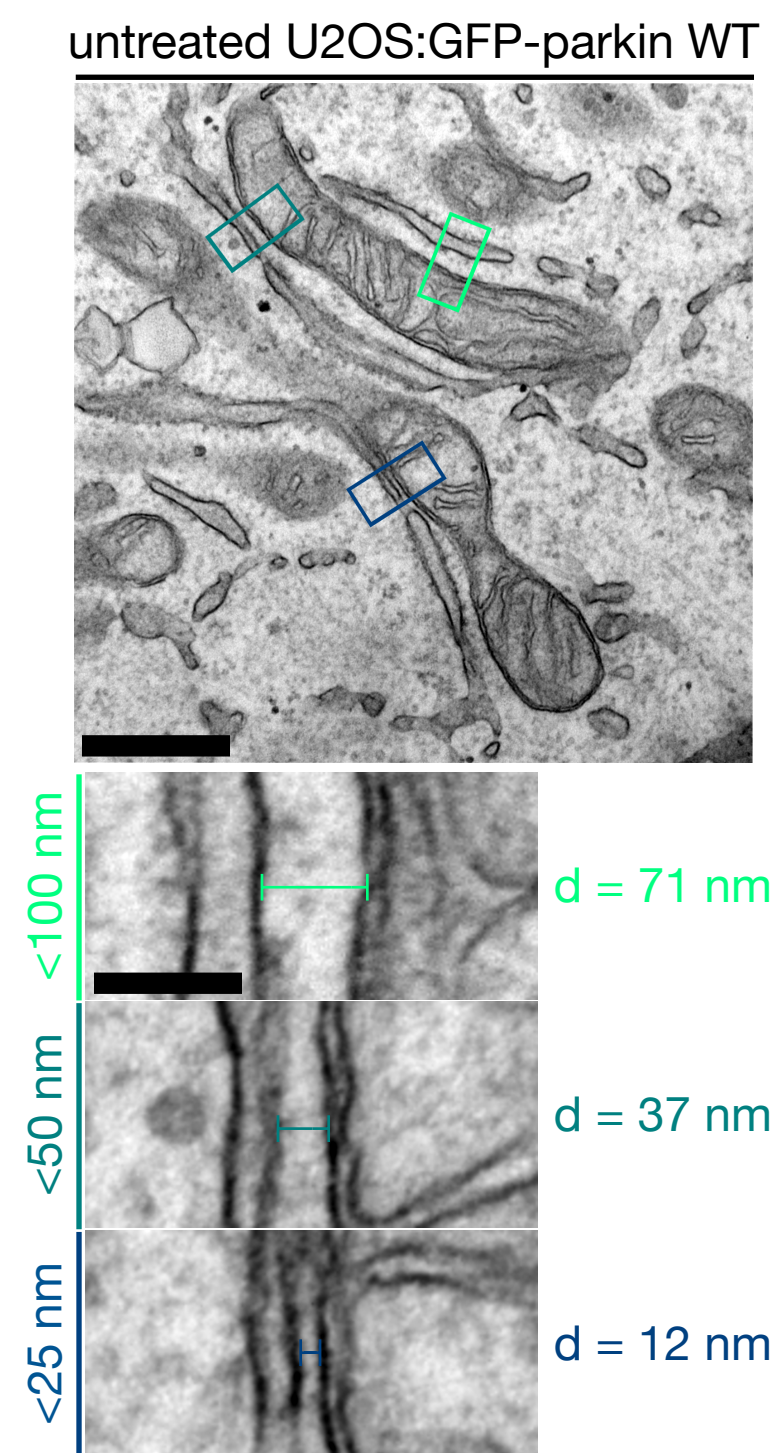

B

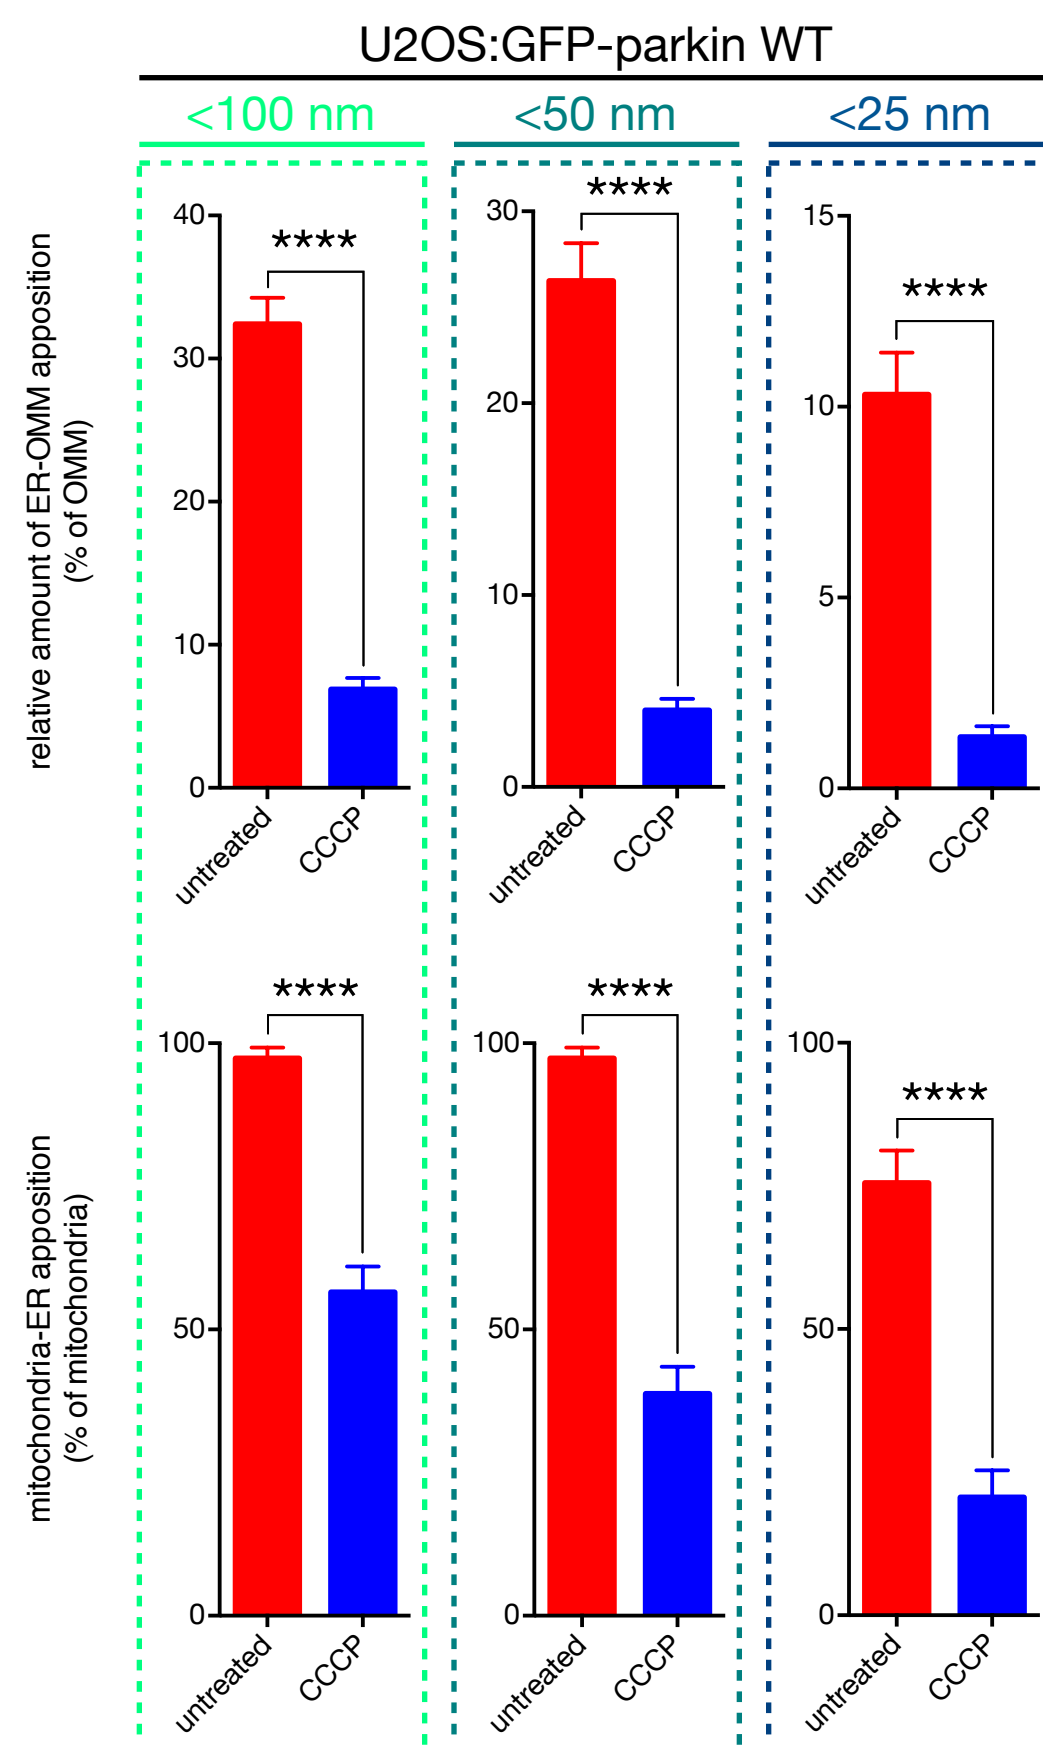

C

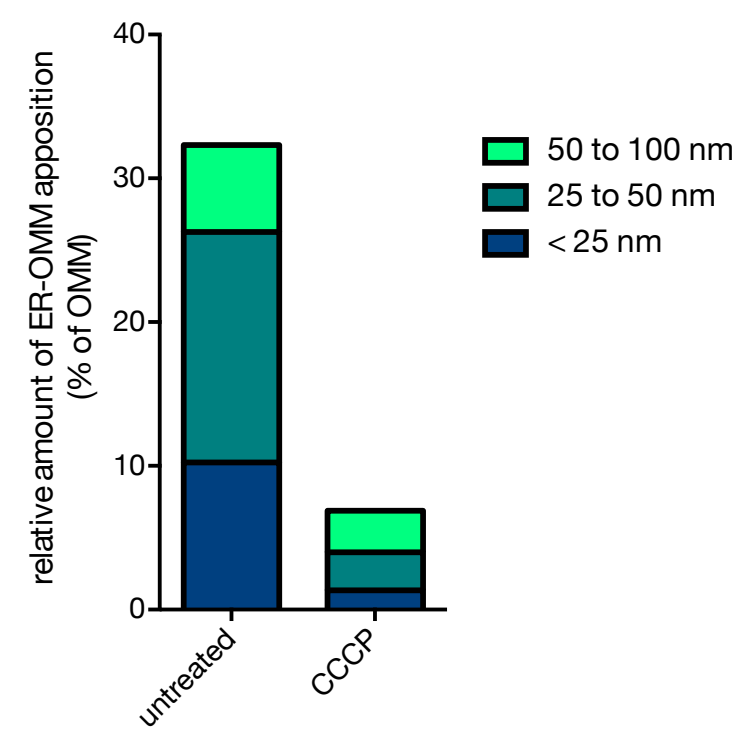

D

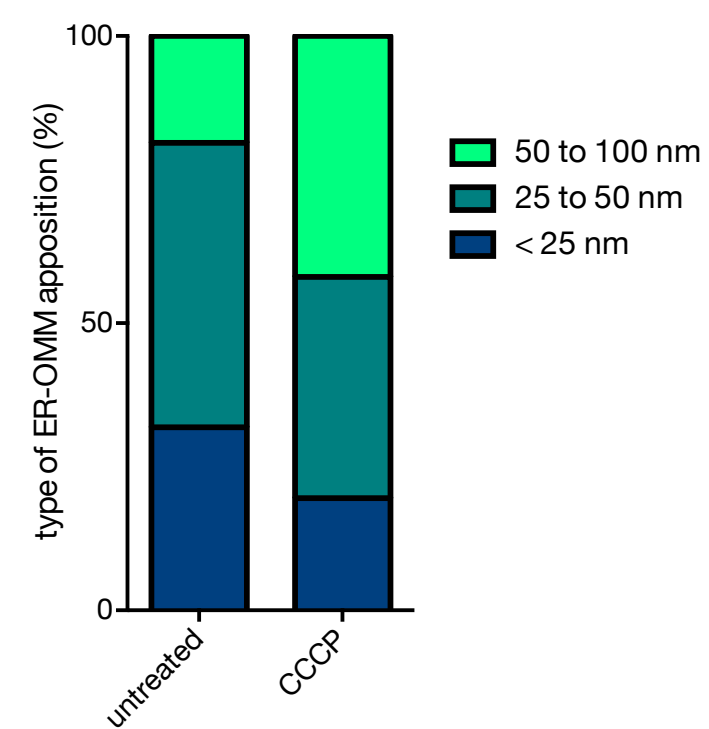

Supplement: supp [file elife-32866-supp-v1.zip]

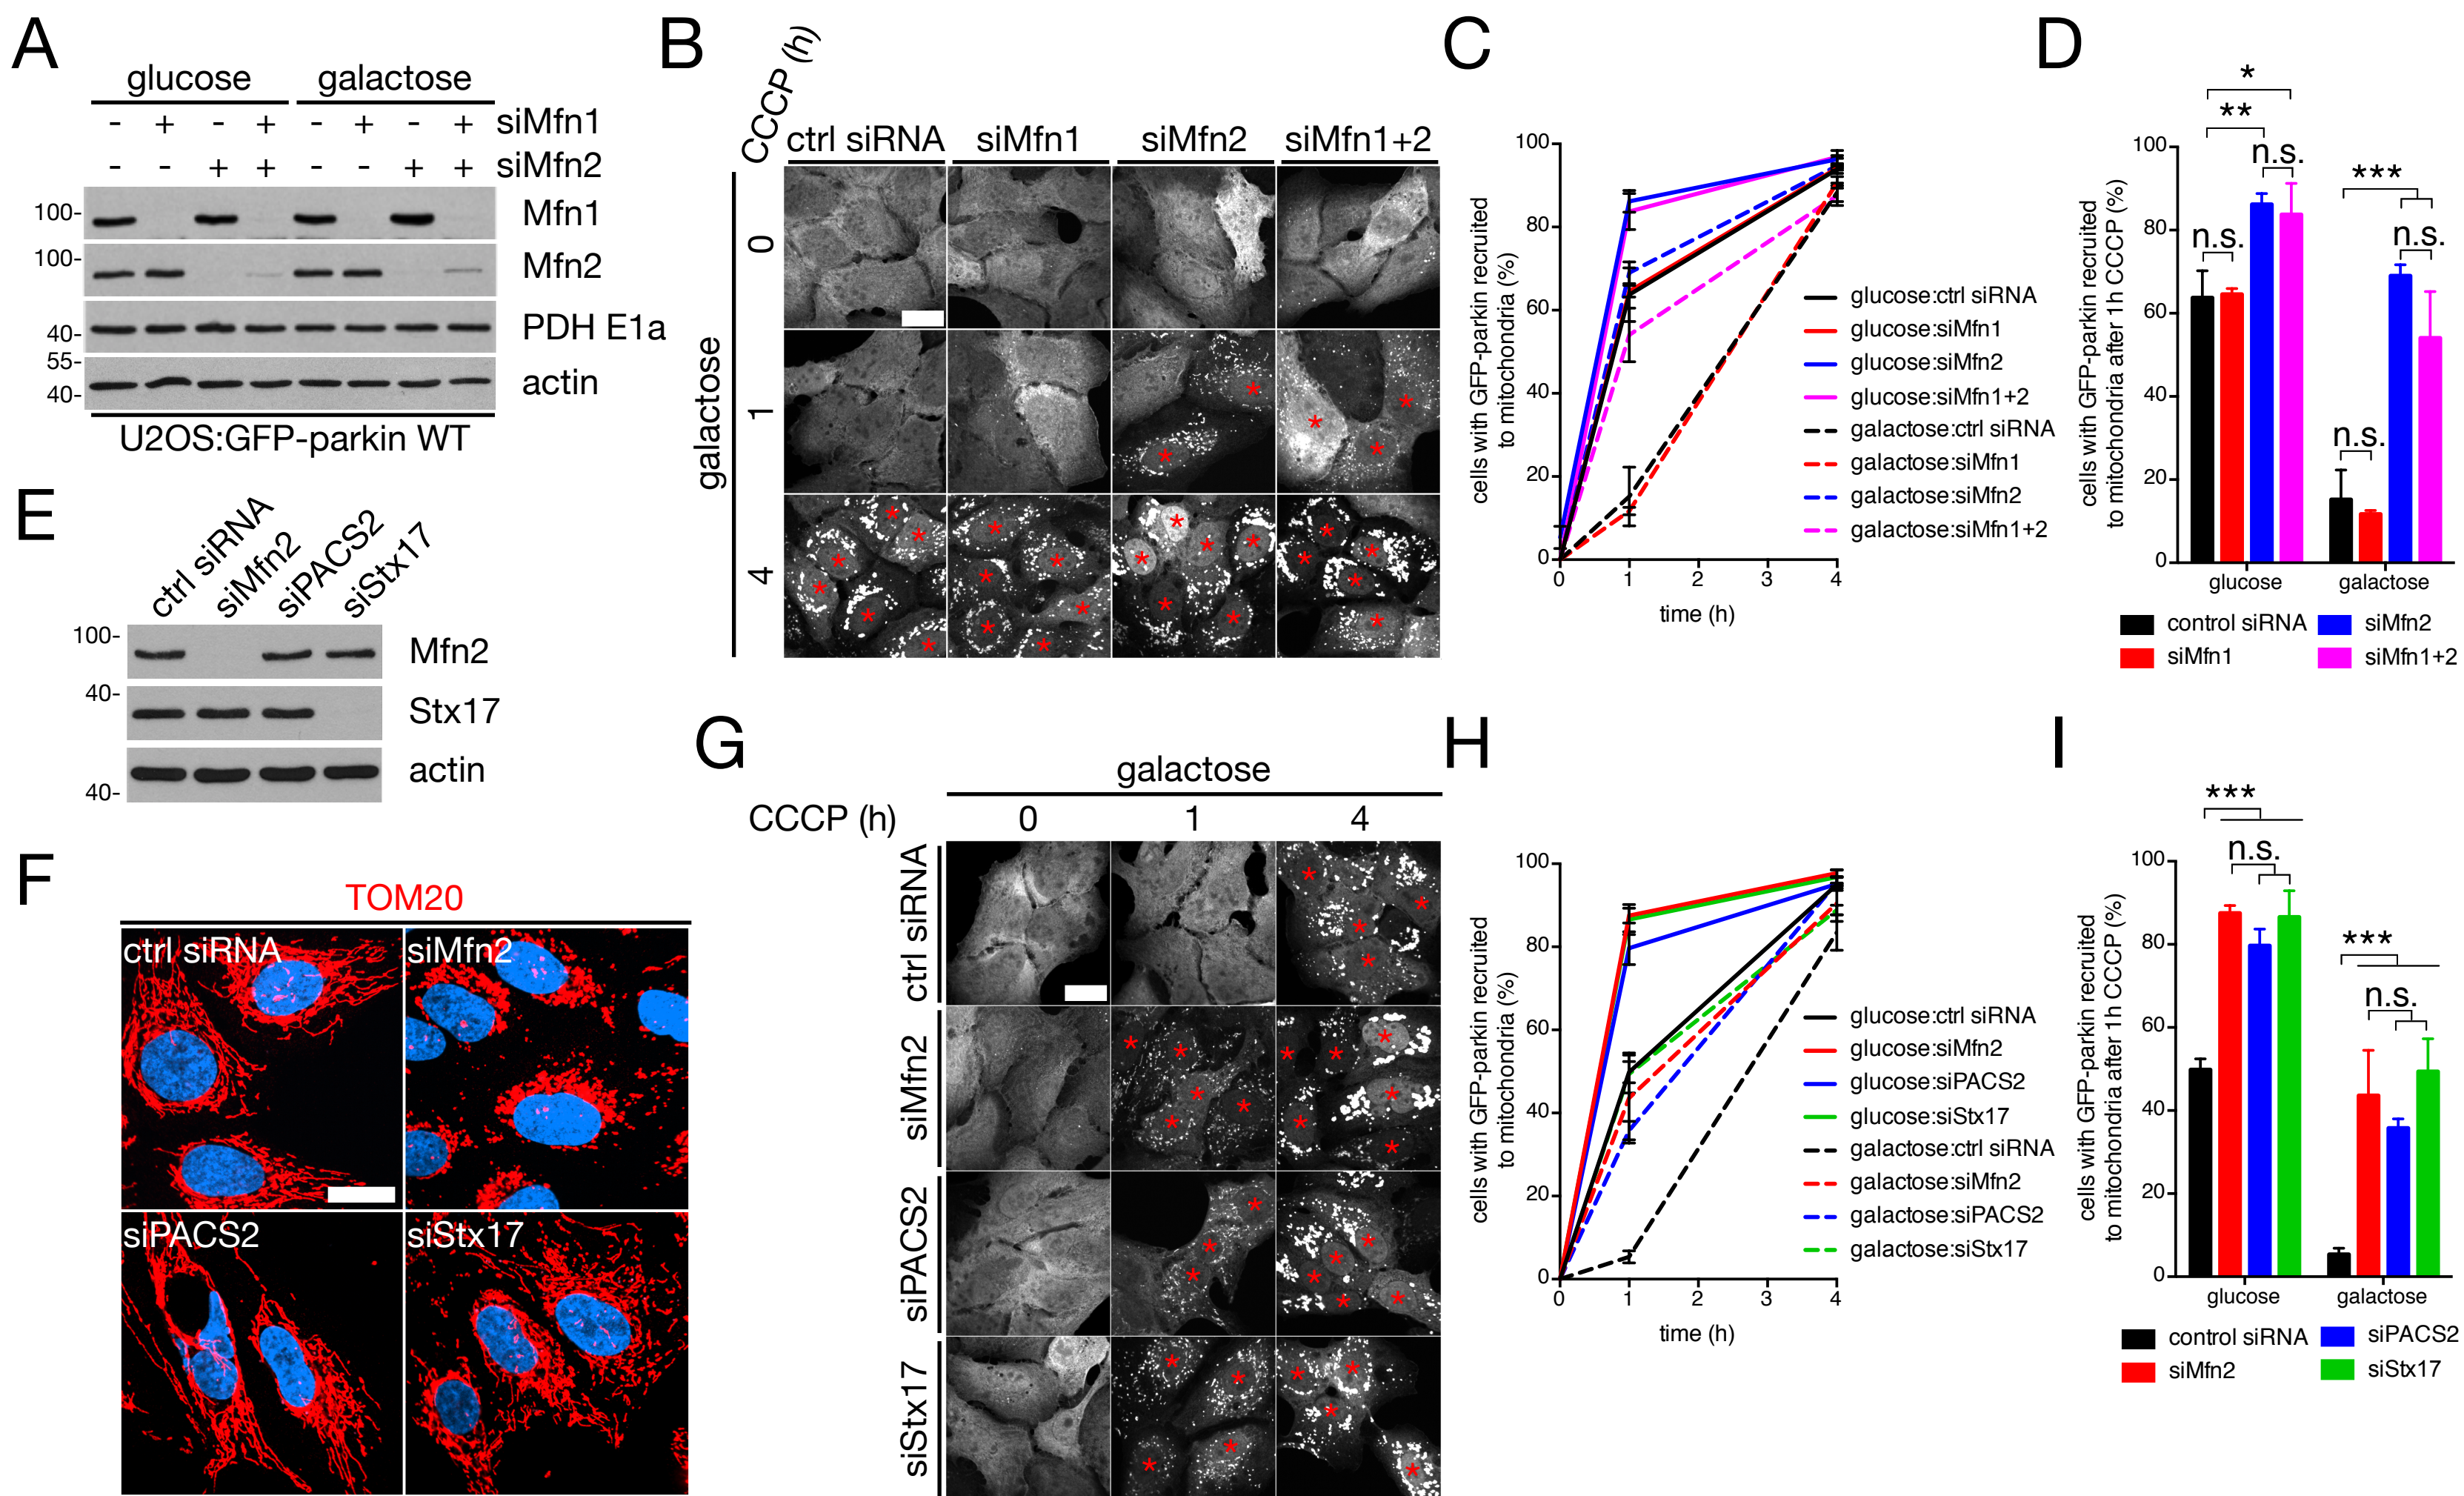

Supplement: supp [file elife-32866-supp-v1.zip]

A

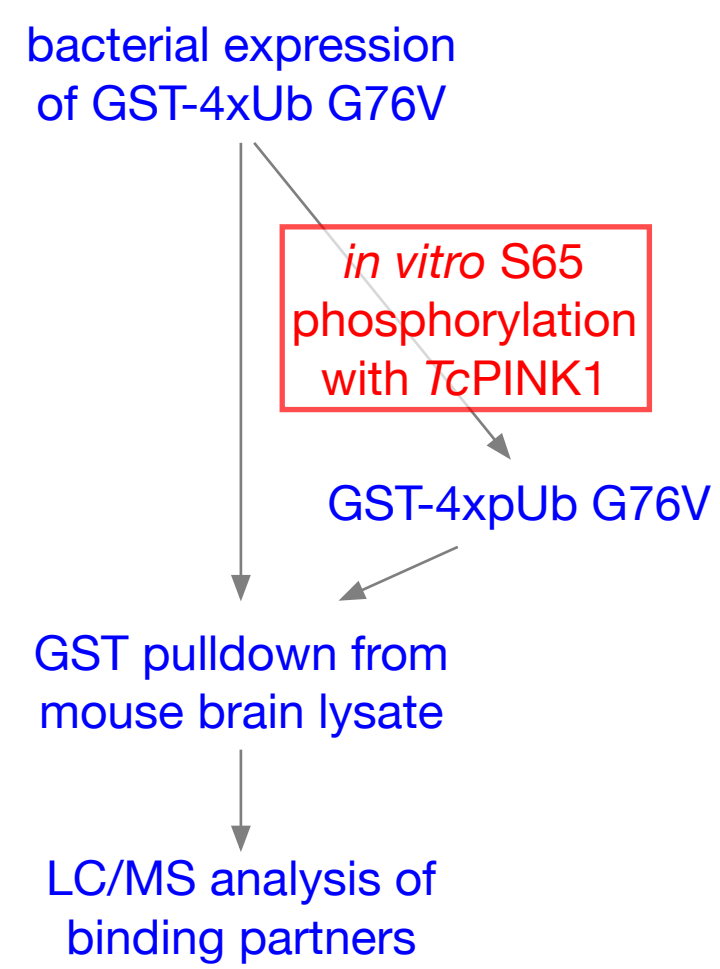

B

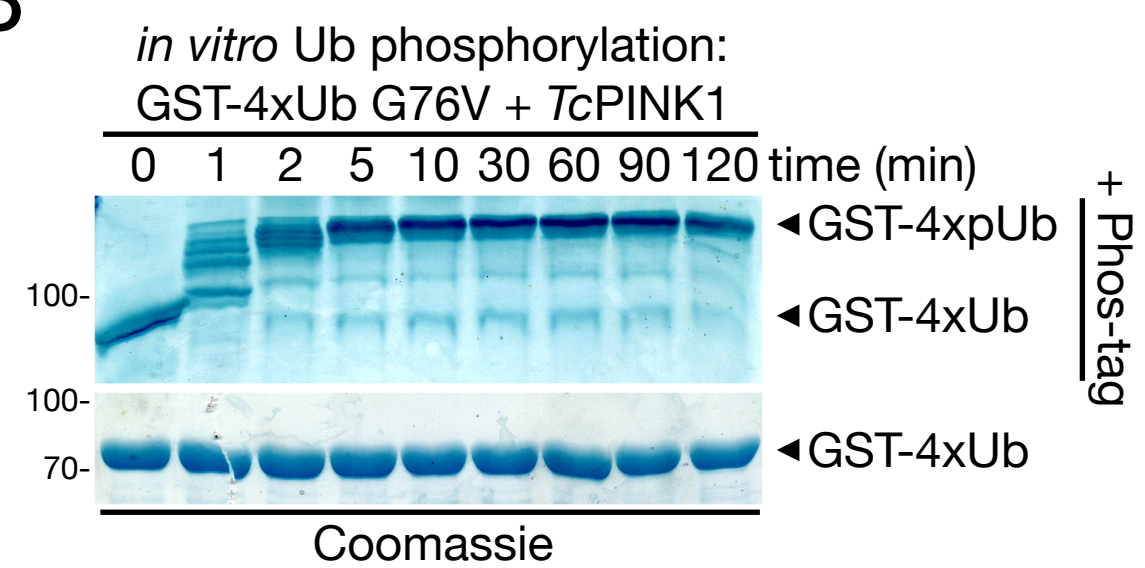

C

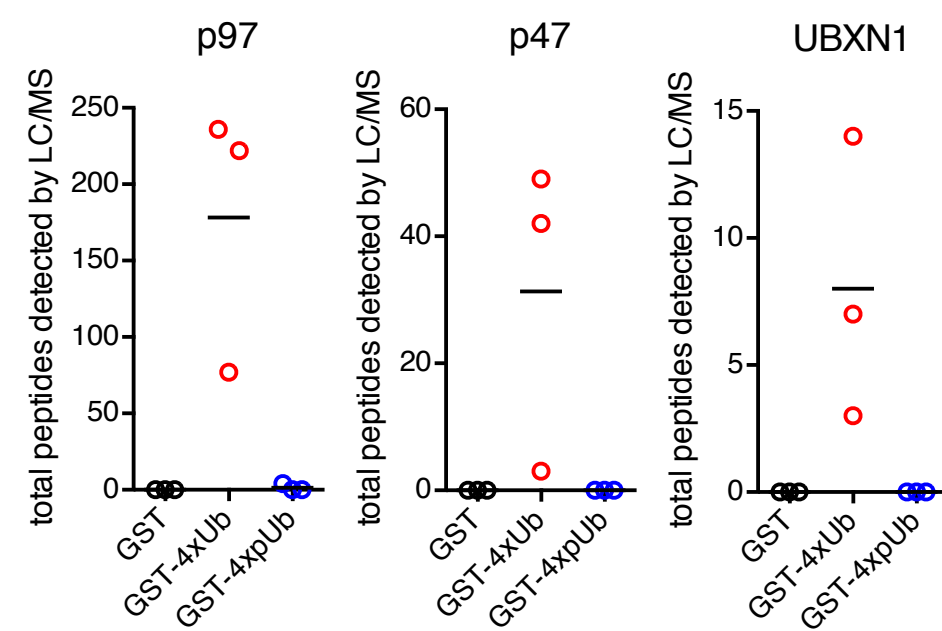

Supplement: supp [file elife-32866-supp-v1.zip]

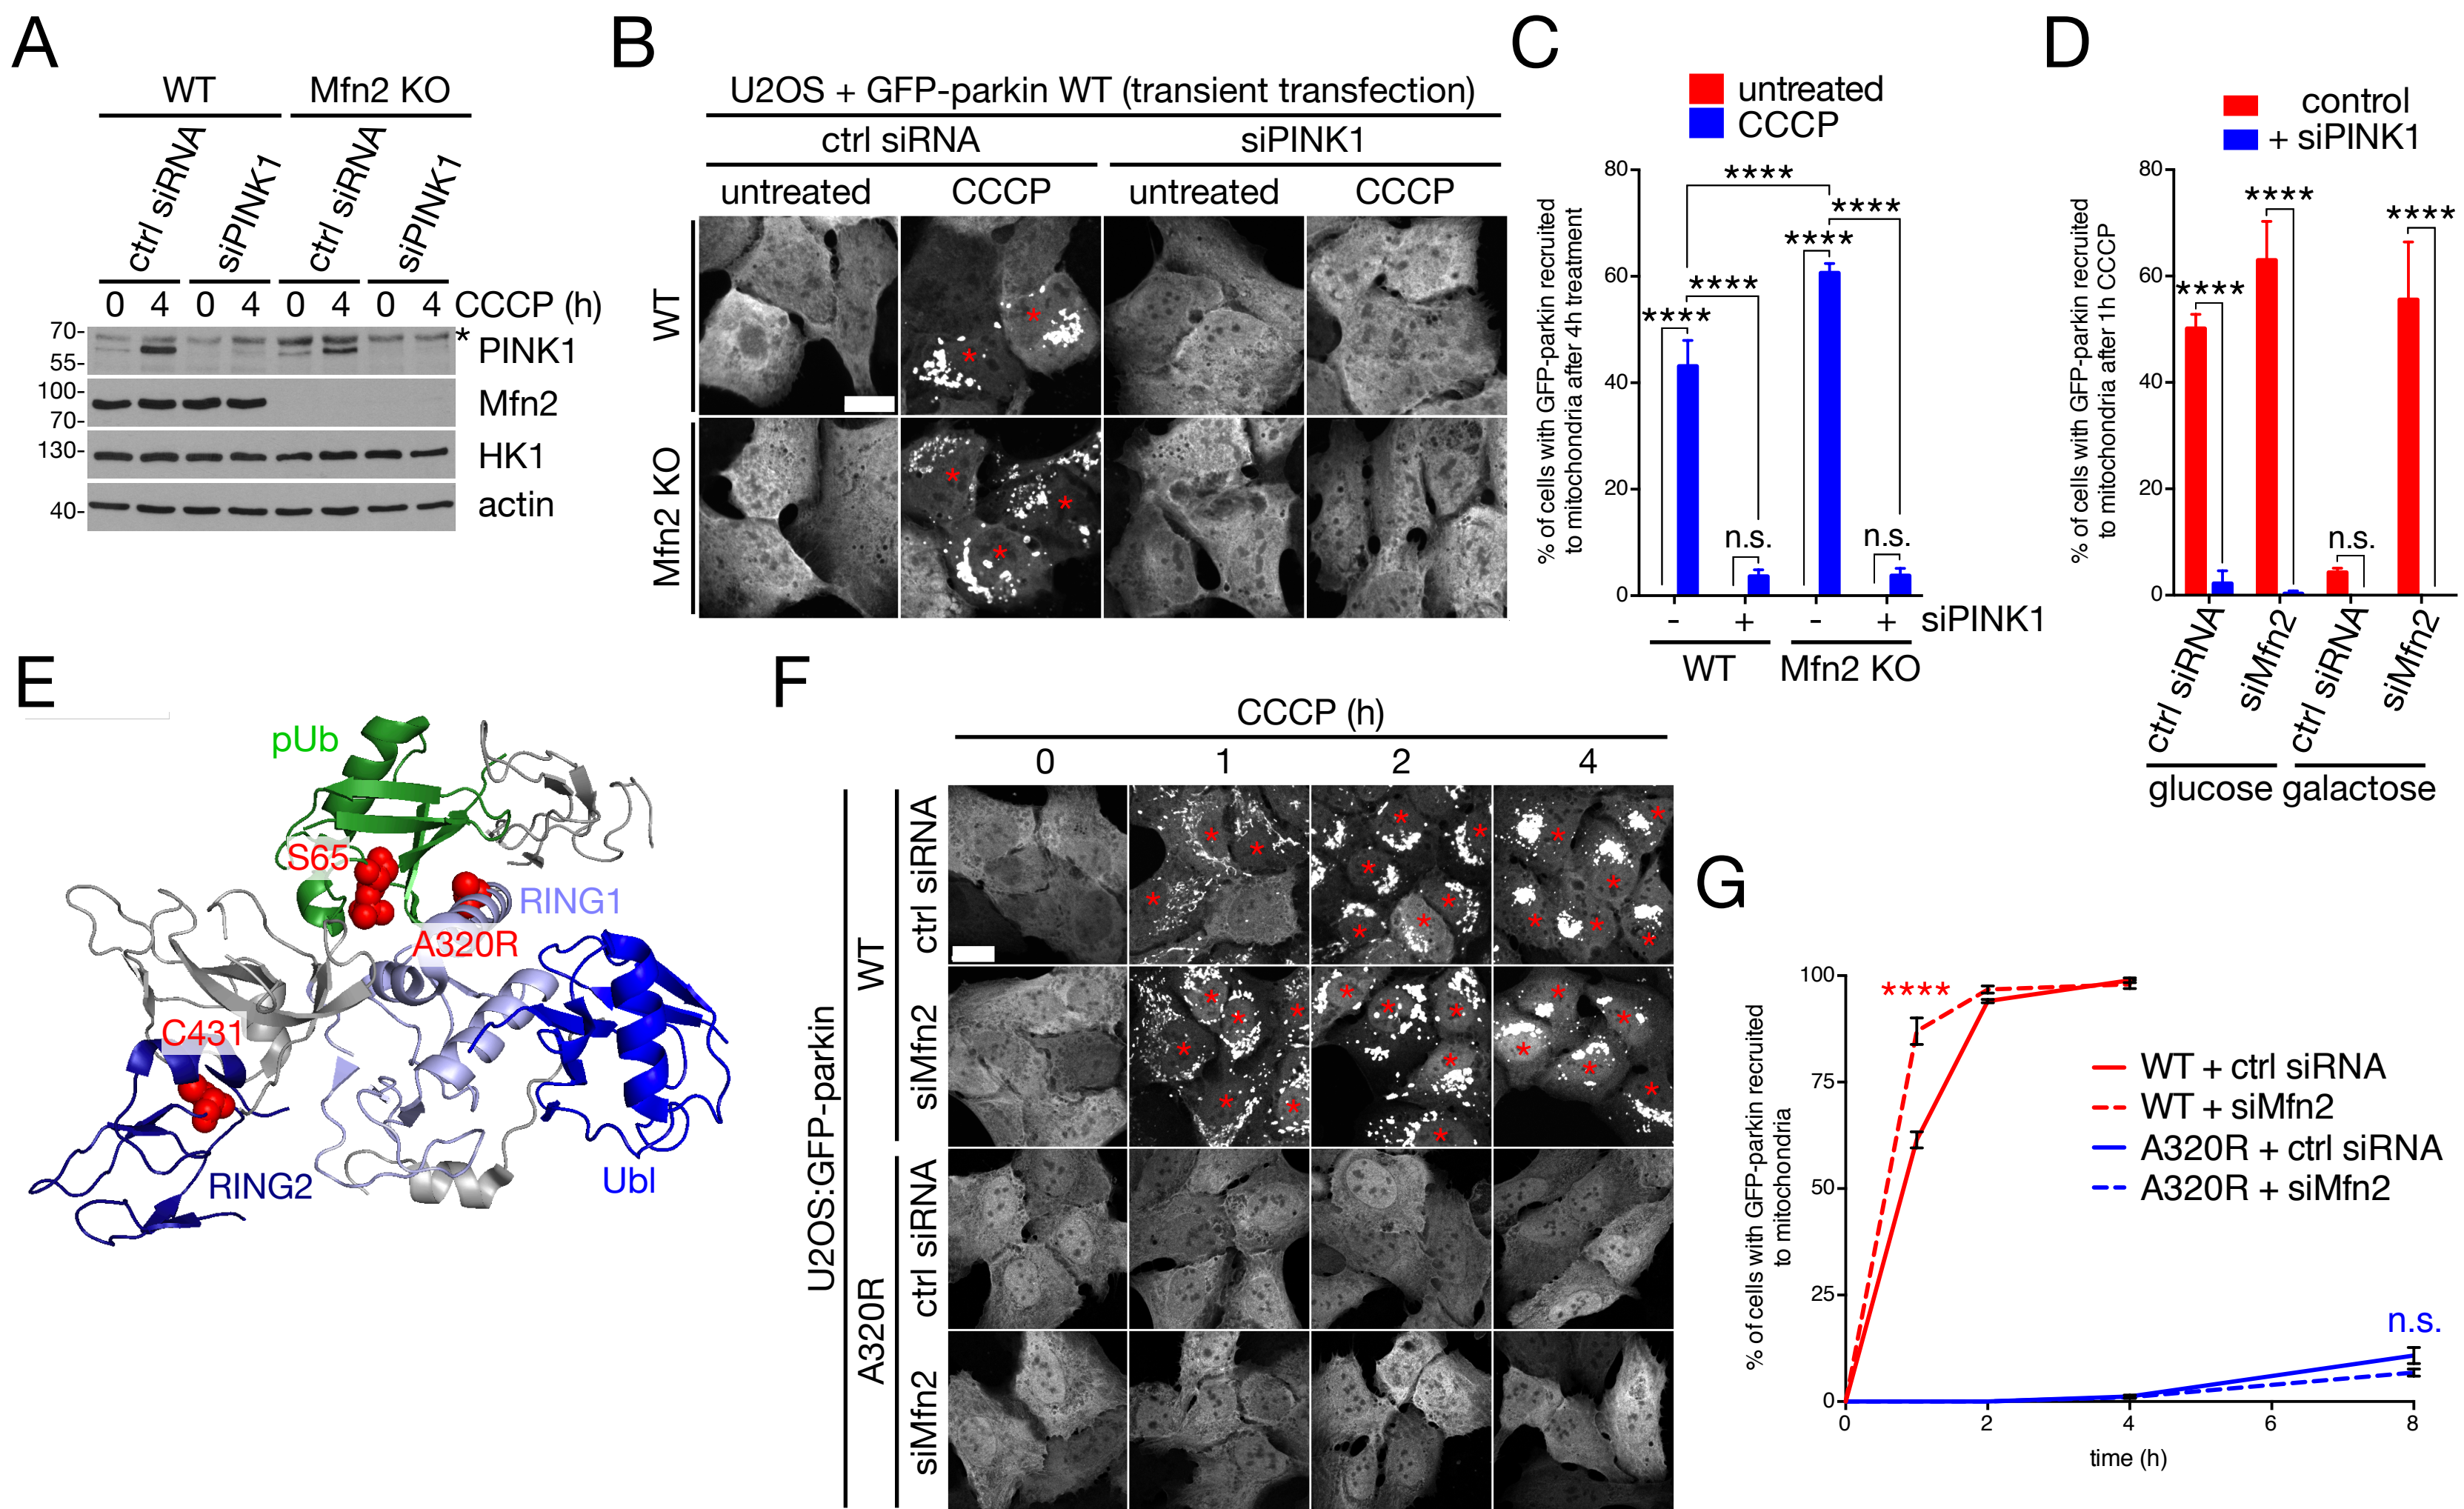

Supplement: supp [file elife-32866-supp-v1.zip]

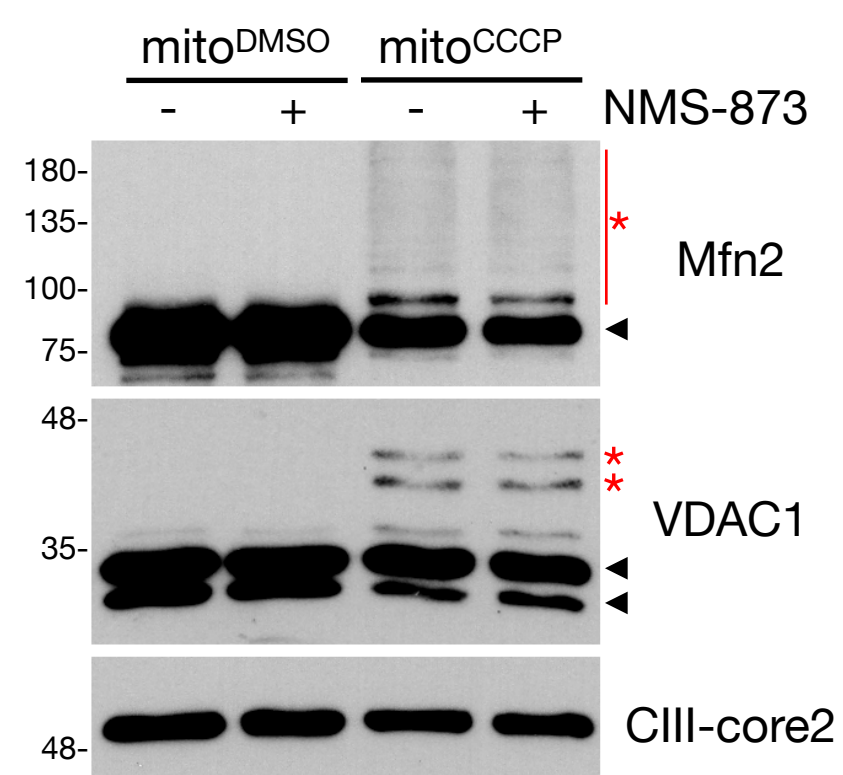

Supplement: supp [file elife-32866-supp-v1.zip]

A

## base peak chromatograms

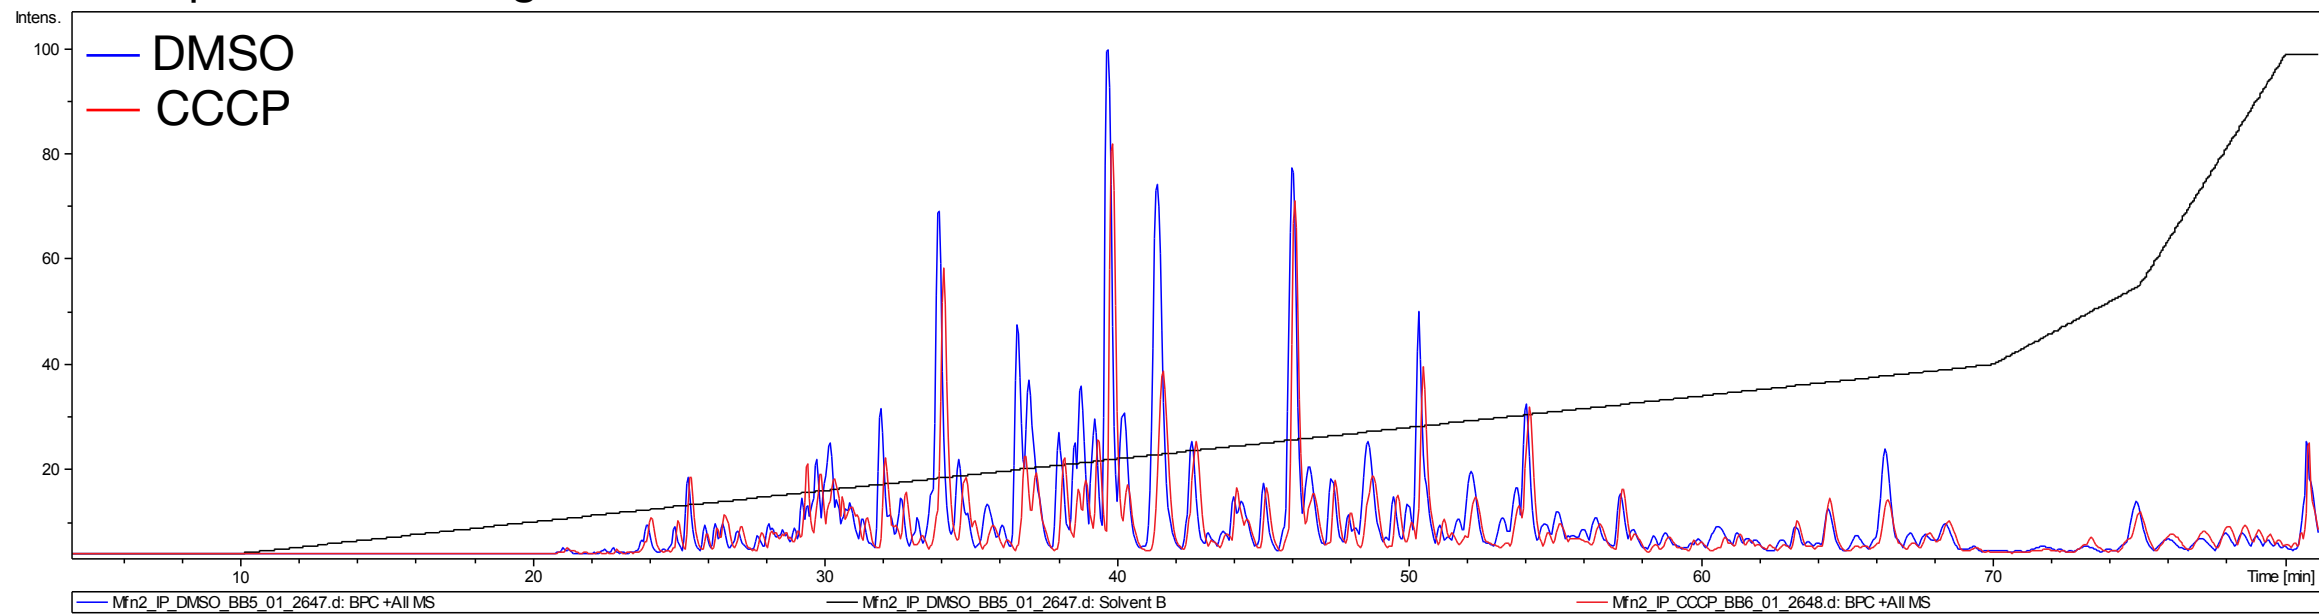

B

## extracted ion chromatograms

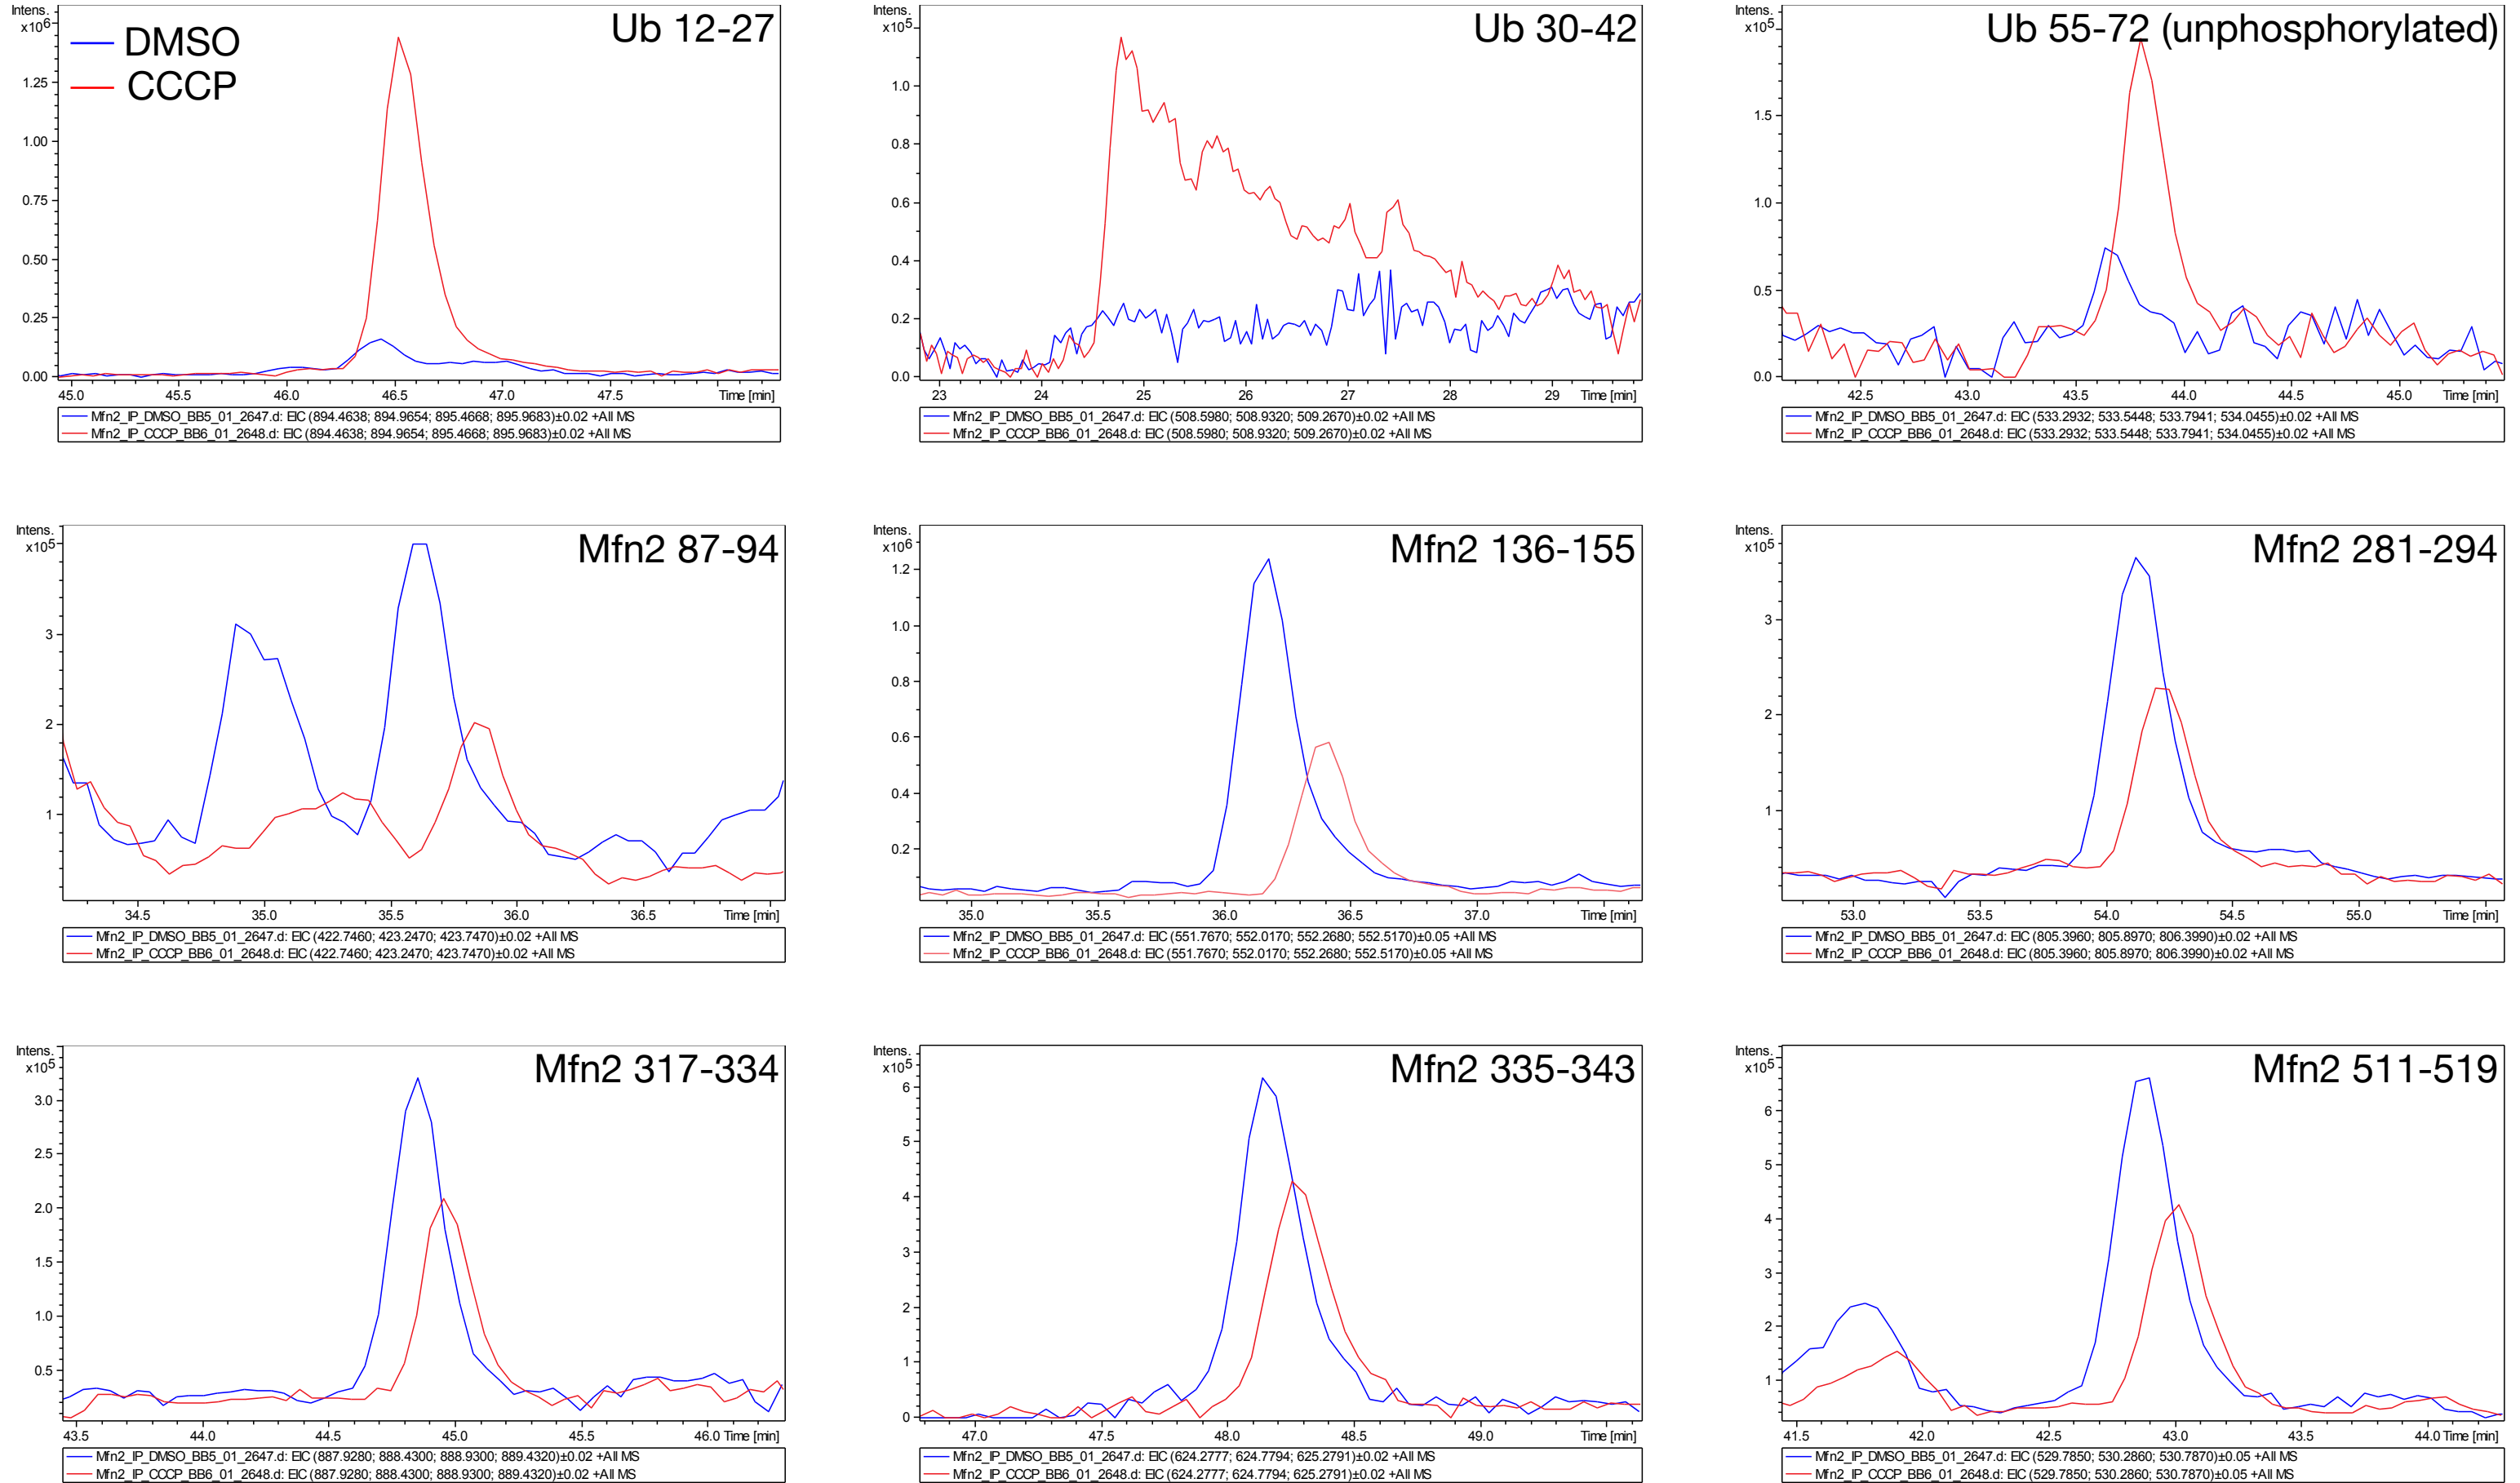

Supplement: supp [file elife-32866-supp-v1.zip]

A

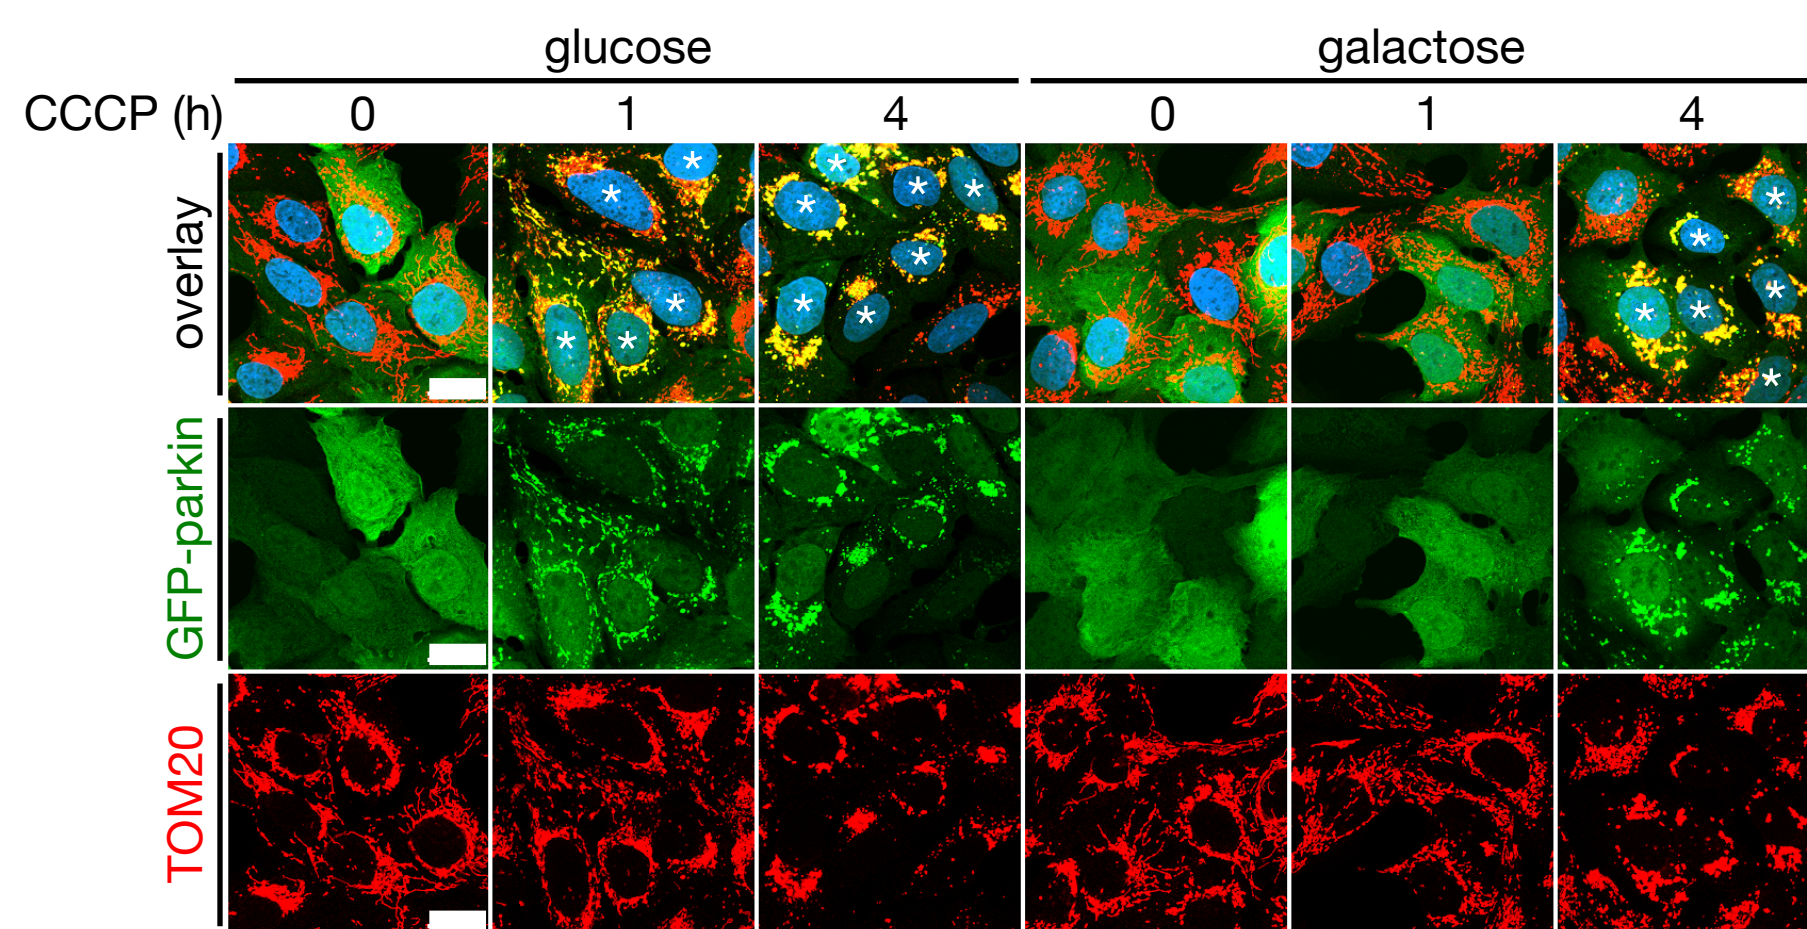

B

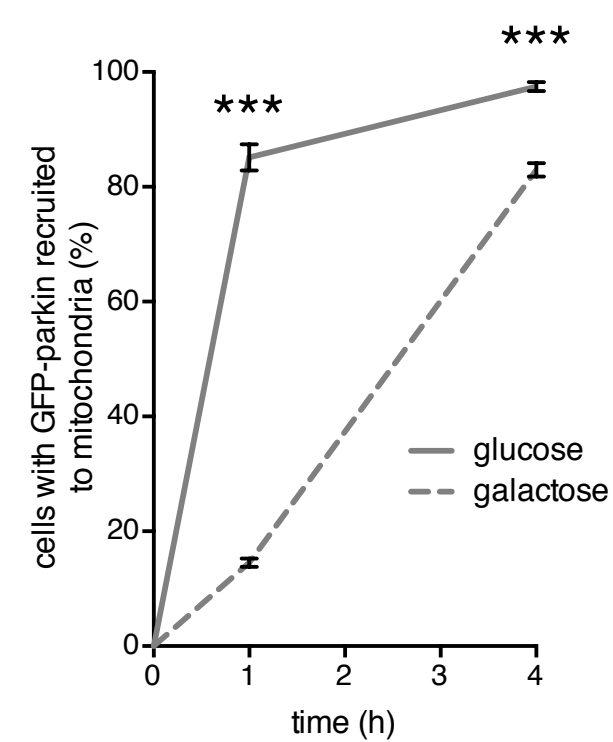

C

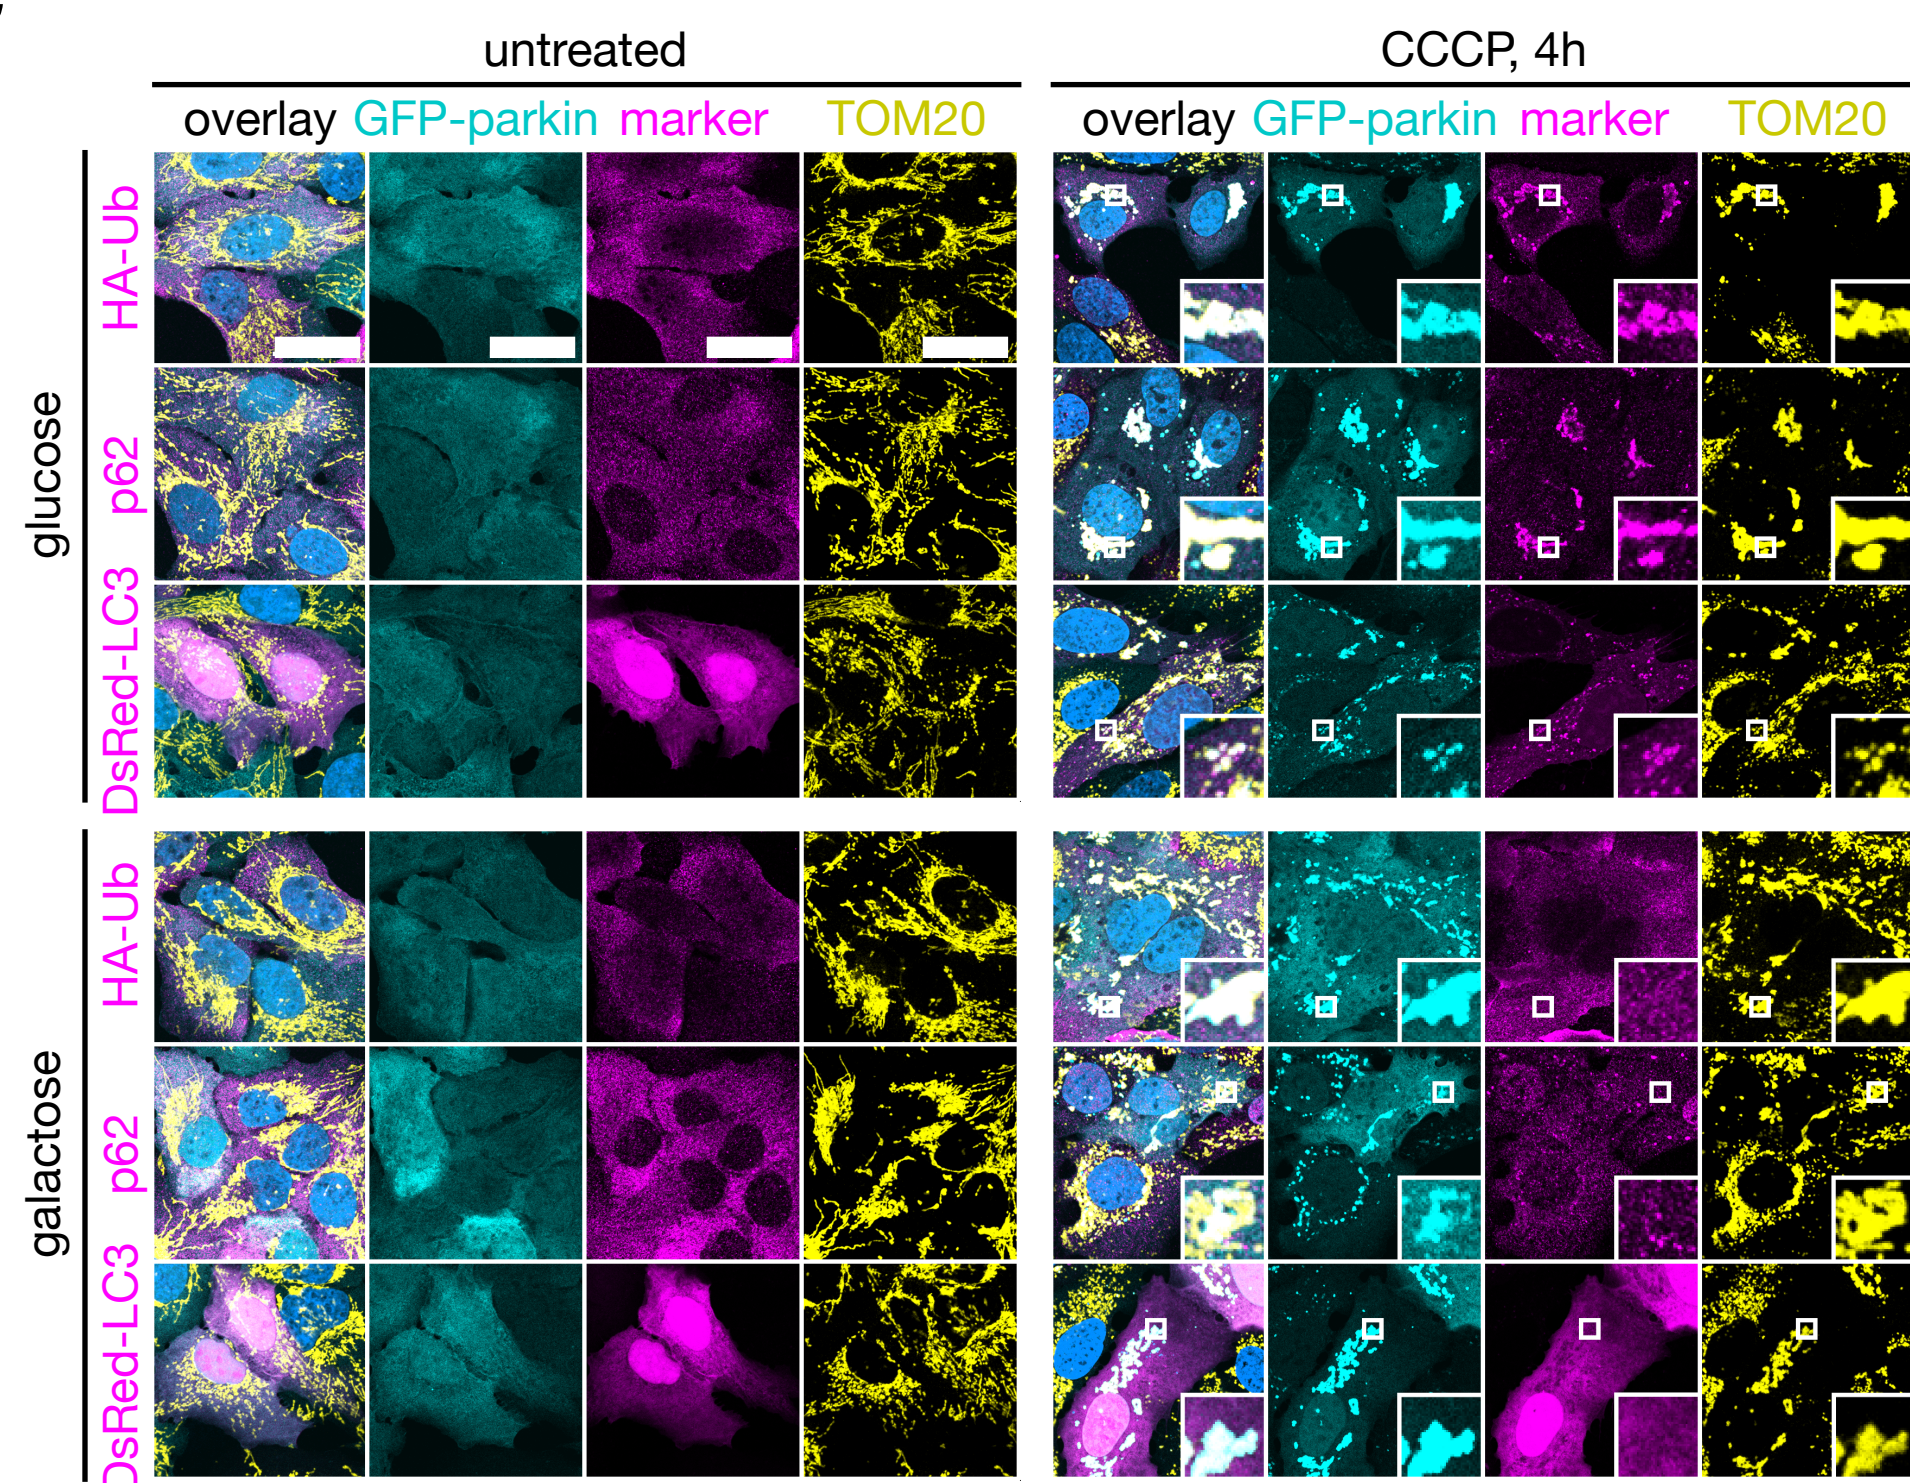

D

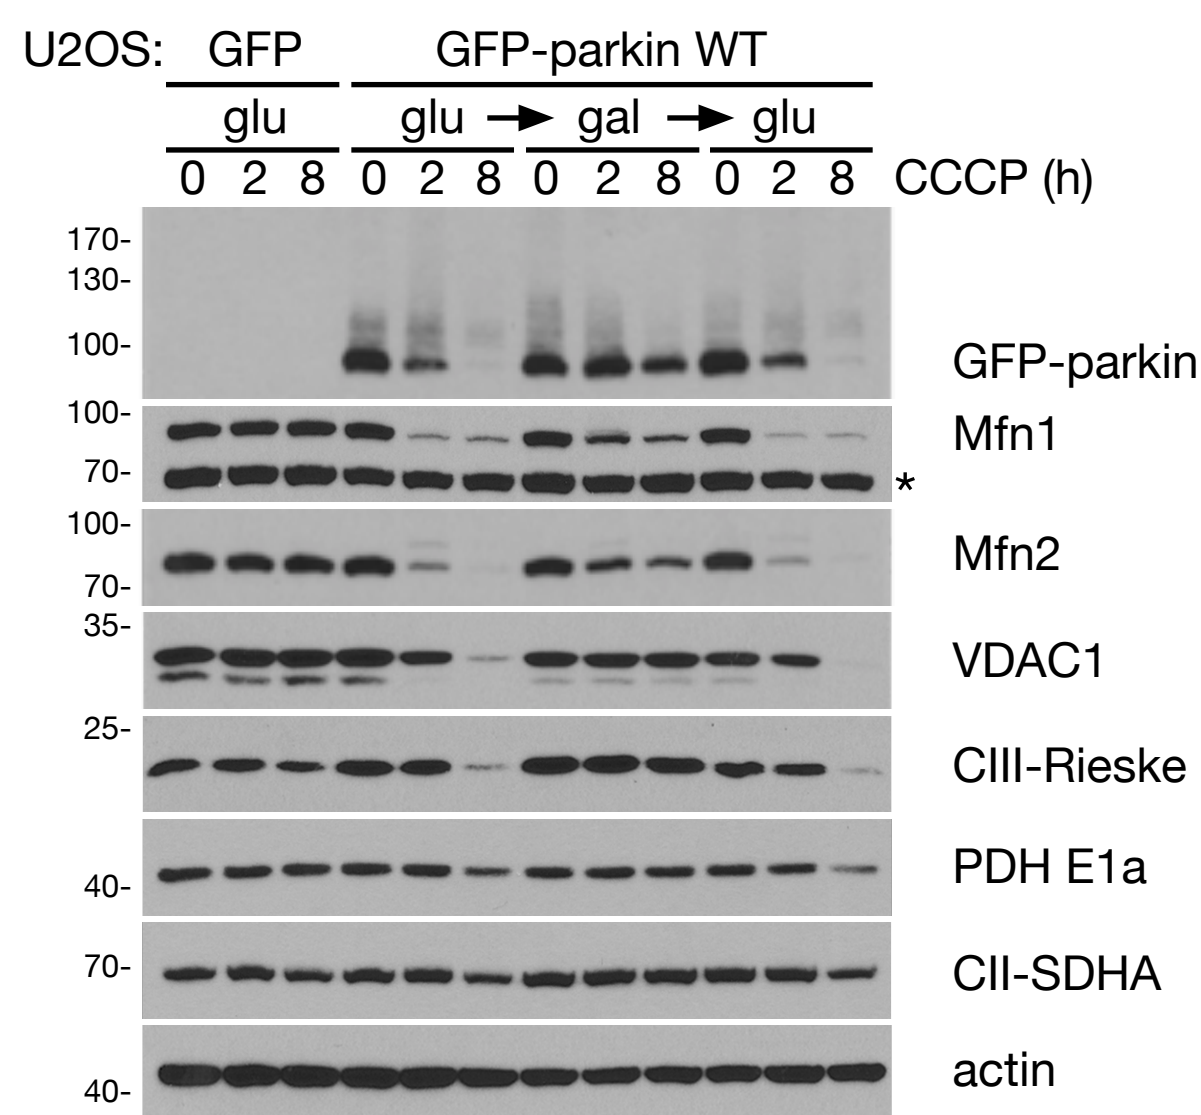

Supplement: supp [file elife-32866-supp-v1.zip]

A

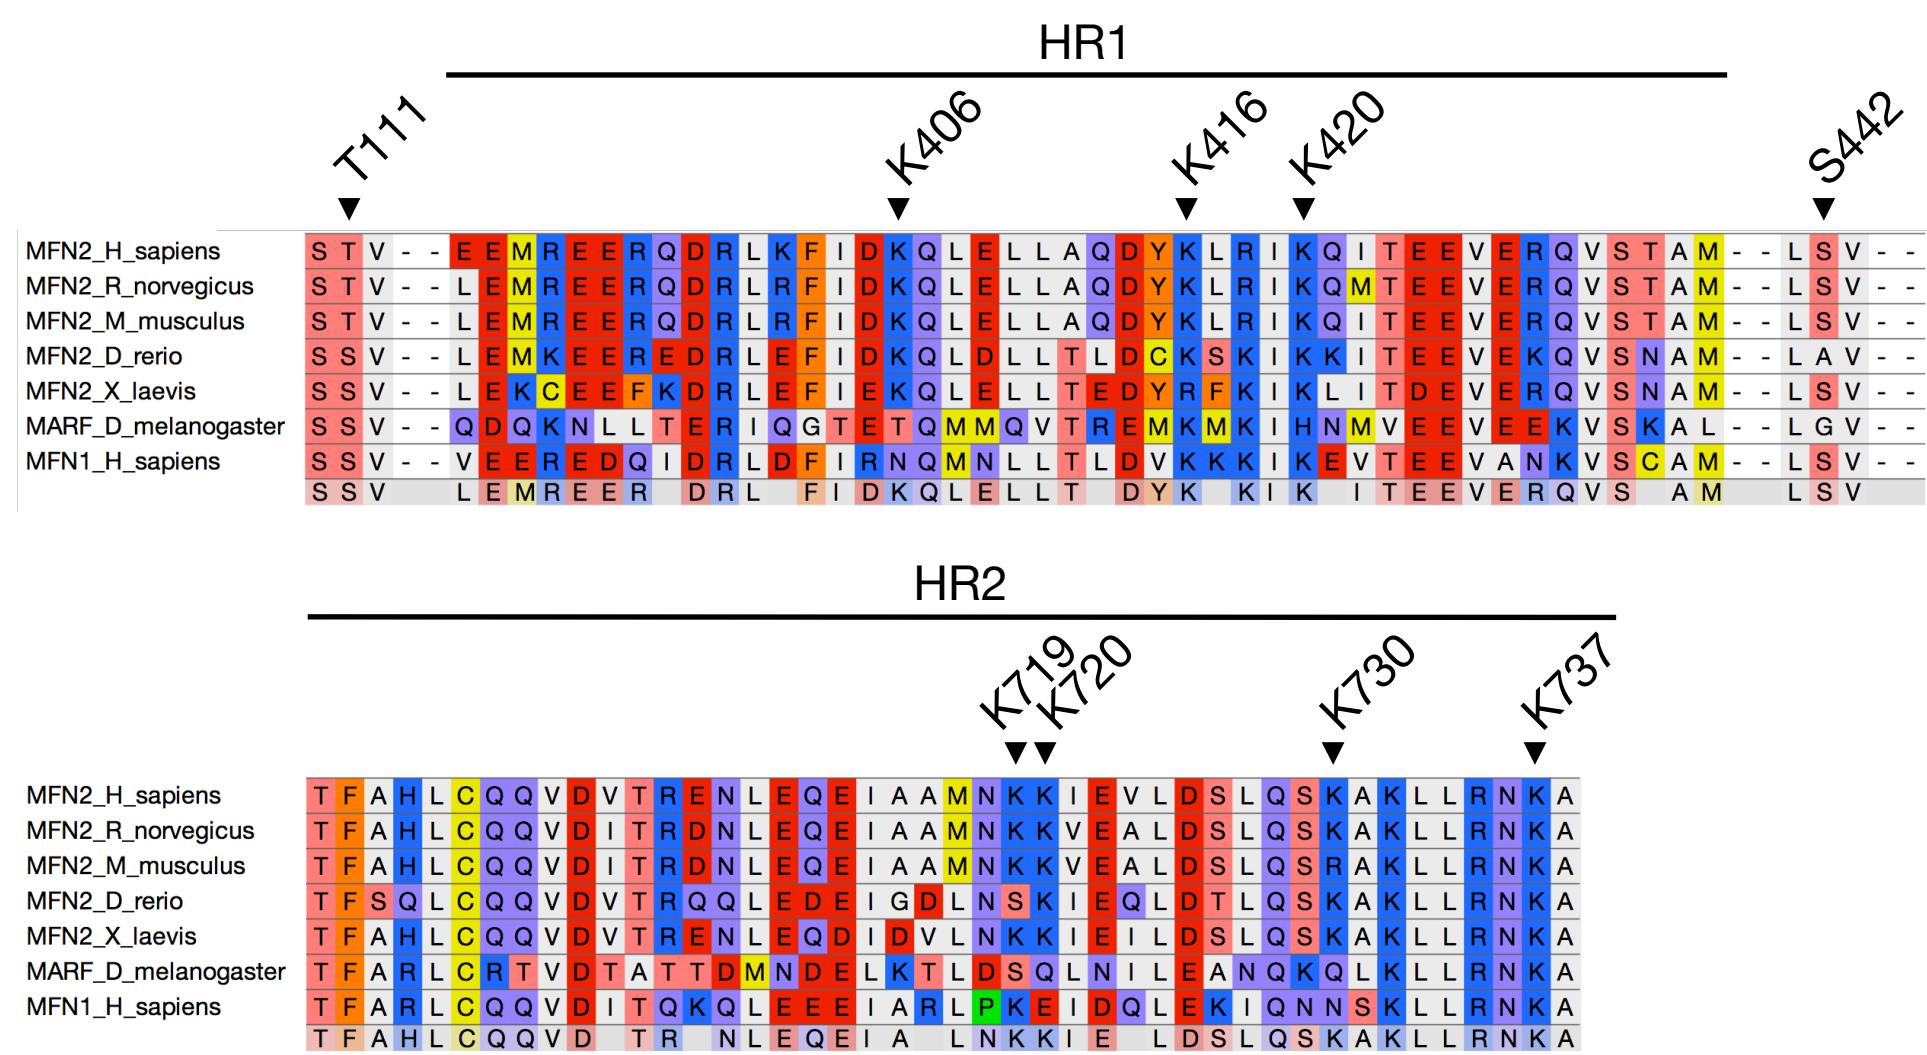

B

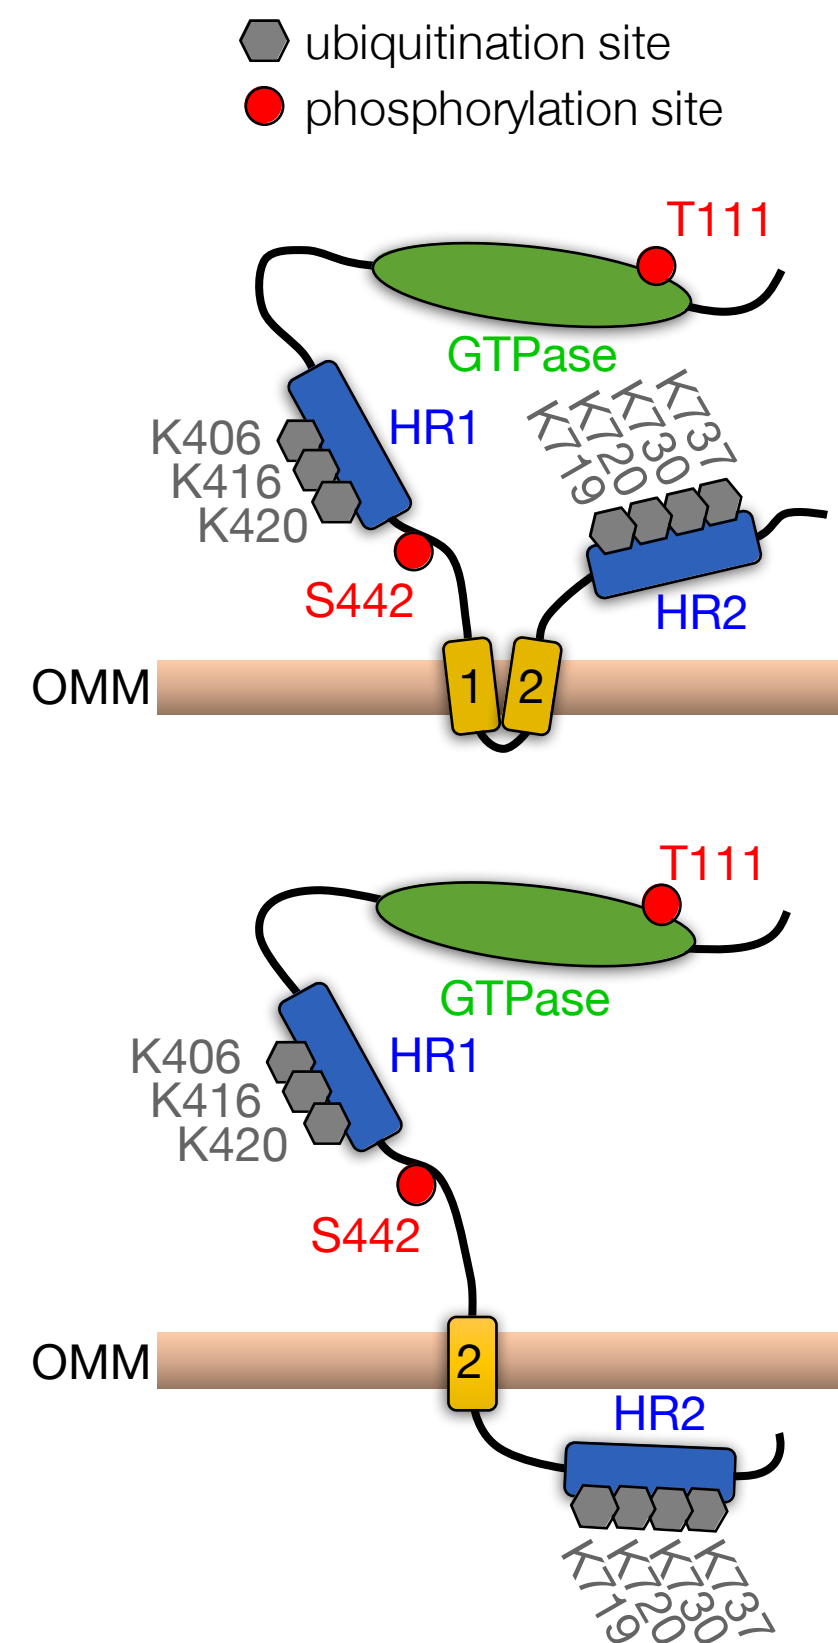

Supplement: supp [file elife-32866-supp-v1.zip]
